# Supplementary material for: A WW-like module in the RAG1 N-terminal domain contributes to previously unidentified protein–protein interactions
Source: PubMed Central journal article supplement — Nucleic Acids Res. 2009 Mar 25;37(10):3301–9. doi: 10.1093/nar/gkp192 (PMC2691831; doi:10.1093/nar/gkp192), 2009-03-25
Supplement: gkp192_1.pdf [file gkp192_1.pdf]

Supplement 1. Splicing Factor 3A2.

LOCUS NM\_013651 1688 bp mRNA linear ROD 17-NOV-2006  
DEFINITION Mus musculus splicing factor 3a, subunit 2 (Sf3a2), mRNA.  
ACCESSION NM\_013651  
VERSION NM\_013651.3 GI:22296887

Full length protein:

MDFQHRPGGKTGSGGVASSSESNRDRRERLRQLALETIDINKDP  
YFMKNHLGSYECKLCLTLHNNEGSYLAHTQGKKHQTNLARRAAKEAKEAPAQPAPEQV  
KVEVKKFVKIGRPGYKVTKQRDTEMGOQSLLFQIDYPEIAEGIMPRHRFMSAYEQRIE  
PPDRRWQYLLMAAEPYETIAFKVPSREIDKAEGKFFFLQFHFKMEKPPAPPSLPAGPP  
GVKRPPPLMNGLPPRPPLPDALPPPPPGGLPLPPMPPTGPAPSGPPGPPQMPPAPG  
VHPPAPVVHPPTSGVHPPAPGVHPPAPVVHPPTSGVHPPAPGVHPPPTPGVHPPA  
(C-terminal cloned target begins here)  
/PGVHPPAPGVHPPAPGVHPPPTPGVHPPAPGVHPPAPGVHPPAPGVHPPPSAGVHPQAPGVHP  
PAPAVHPQAPGVHPPAPGIHPQAPGVHPQPPPGVHPAAPGVHPQPPGVHPSNPGVHPA  
PMPMLRPPLPSDGPNGMPPPPGN
