# Supplementary material for: A WW-like module in the RAG1 N-terminal domain contributes to previously unidentified protein–protein interactions
Source: PubMed Central journal article supplement — Nucleic Acids Res. 2009 Mar 25;37(10):3301–9. doi: 10.1093/nar/gkp192 (PMC2691831; doi:10.1093/nar/gkp192), 2009-03-25
Supplement: gkp192_2.pdf [file gkp192_2.pdf]

Supplemental alignments of RAG1 sequences over the WW-like motif.

The query sequence was from the Coelecanth:

1  
VIHPTHFCHTC**W**TVIRKWISDPNSQ**EMGVL**ADRVV**GWLP**HSLF  
CKICDTGNRAVK 55

Bolded letters above are the residues specifically addressed in the accompanying manuscript. In the alignments vertical red lines precede the conserved Ws and the central residue of the hydrophobic core.

Dots are identity to the query sequence.

Genebank accession numbers for each sequence are listed on the left.

This file is bookmarked to divide it into taxonomic groups: Mammals, Reptiles1, Reptiles2, Turtles, Crocodiles, Amphibians, Lizards, Birds, And Fish.

# MAMMALS Alignments

|              |     |             |     |      |      |     |      |        |        |      |      |          |          |          |      |     |     |      |       |       |       |     |     |     |
|--------------|-----|-------------|-----|------|------|-----|------|--------|--------|------|------|----------|----------|----------|------|-----|-----|------|-------|-------|-------|-----|-----|-----|
| Query        | 1   | VIHPHFCHCTC | WT  | VIRK | WISD | PN  | SQEM | GL     | ADRV   | VVGL | WLP  | PHSL     | FKIC     | CDT      | GNRA | VK  | 55  |      |       |       |       |     |     |     |
| AAP76417     | 138 | T           | ... | E    | ...  | N   | ...  | S      | IMHRKF | SAPC | -    | VYF      | PPRNATME | H        | ...  | APS | D   | ...  | H     | AR    | GL    | 191 |     |     |
| AAP76411     | 139 | ...         | E   | ...  | N    | ... | S    | IMHRKF | SAPC   | -    | VYF  | PPRNATME | H        | ...      | TPS  | D   | ... | H    | AR    | GL    | 191   |     |     |     |
| AAP76412     | 5   | ...         | E   | ...  | N    | ... | S    | IMHRKF | SAPC   | -    | VYF  | PPRNATME | H        | ...      | TPS  | D   | ... | H    | AR    | GL    | 57    |     |     |     |
| EAW68118     | 170 | ...         | E   | ...  | N    | ... | S    | IMHRKF | SAPC   | -    | VYF  | PPRNATME | H        | ...      | TPS  | D   | ... | N    | AR    | GL    | 222   |     |     |     |
| XP 521888    | 170 | ...         | E   | ...  | N    | ... | S    | IMHRKF | SAPC   | -    | VYF  | PPRNATME | H        | ...      | TPS  | D   | ... | N    | AR    | GL    | 222   |     |     |     |
| NP 000439    | 170 | ...         | E   | ...  | N    | ... | S    | IMHRKF | SAPC   | -    | VYF  | PPRNATME | H        | ...      | TPS  | D   | ... | N    | AR    | GL    | 222   |     |     |     |
| XP 001488008 | 169 | ...         | E   | ...  | N    | ... | S    | IMHRKF | SAPC   | -    | VYF  | PPRNATME | H        | ...      | TPS  | D   | ... | H    | AR    | GL    | 221   |     |     |     |
| AAH37344     | 170 | ...         | E   | ...  | N    | ... | S    | IMHRKF | SAPC   | -    | VYF  | PPRNATME | H        | ...      | TPS  | D   | ... | N    | AR    | GL    | 222   |     |     |     |
| AAP76418     | 139 | ...         | E   | ...  | N    | ... | S    | IMHRKF | SAPC   | -    | VYF  | PPRNATME | H        | ...      | TPS  | D   | ... | H    | VR    | GL    | 191   |     |     |     |
| AAP76419     | 10  | ...         | E   | ...  | N    | ... | S    | IMHRKF | SAPC   | -    | VYF  | PPRNATME | H        | ...      | TPS  | D   | ... | H    | VR    | GL    | 62    |     |     |     |
| XP 001084631 | 170 | ...         | E   | ...  | N    | ... | S    | IMHRKF | SAPC   | -    | VYF  | PPRNVT   | E        | H        | ...  | TPS | D   | ...  | N     | AR    | GL    | 222 |     |     |
| AAP76421     | 139 | ...         | E   | ...  | N    | ... | S    | IMHRKF | SAPC   | -    | VYF  | PPRNATME | H        | ...      | TPS  | D   | ... | HSAR | GL    | 191   |       |     |     |     |
| AAP76408     | 140 | ...         | E   | ...  | N    | ... | S    | IMHRKF | SAPC   | -    | VYF  | PPRNATME | H        | ...      | TPS  | D   | ... | H    | AR    | GL    | 191   |     |     |     |
| P34088       | 169 | ...         | E   | ...  | N    | ... | S    | IMHRKF | GAPC   | -    | VYF  | PPRNATME | H        | ...      | APS  | D   | ... | Y    | AR    | GL    | 221   |     |     |     |
| AAP76407     | 109 | T           | ... | E    | ...  | N   | ...  | S      | IMHRKF | SAPC | -    | VYF      | PPRNATME | H        | ...  | TPS | N   | ...  | H     | AR    | GL    | 162 |     |     |
| AAP76431     | 114 | ...         | Q   | ...  | QN   | ... | G    | IMHRKF | SAP    | -    | R    | VYF      | PPRNATME | H        | ...  | TPS | D   | ...  | H     | AR    | GL    | 166 |     |     |
| AAQ63083     | 143 | ...         | E   | ...  | N    | ... | S    | IMYRKF | SAPC   | -    | VYF  | PPRNAIME | H        | ...      | TPS  | D   | ... | L    | AH    | GL    | 195   |     |     |     |
| AAP76410     | 133 | ...         | E   | ...  | N    | ... | S    | IMHRKF | SAPC   | -    | VYF  | PPRNATME | R        | ...      | TSS  | D   | ... | H    | AR    | GL    | 186   |     |     |     |
| AAP76426     | 137 | ...         | E   | ...  | QN   | ... | S    | IMHRKF | SSPC   | -    | VYF  | PPRNATME | H        | ...      | TPS  | D   | ... | HAAC | GL    | 189   |       |     |     |     |
| AAP76414     | 138 | T           | ... | E    | ...  | N   | ...  | S      | IMHRKF | SAPC | -    | VYF      | PPRNATME | H        | ...  | APS | D   | ...  | H     | AR    | GL    | 191 |     |     |
| AAQ76435     | 129 | ...         | E   | ...  | QN   | ... | S    | IMHRKF | SAPC   | -    | VYF  | QRNATME  | H        | ...      | TPS  | D   | ... | H    | AR    | GL    | 181   |     |     |     |
| AAQ63058     | 131 | T           | ... | E    | ...  | N   | ...  | S      | IMHRKF | SAPC | -    | VYF      | PPRNATME | H        | ...  | TPS | D   | ...  | LN    | AH    | GL    | 184 |     |     |
| AAP76427     | 135 | ...         | E   | ...  | QN   | ... | S    | IMHRKF | SAP    | -    | R    | VYF      | PPRNATME | H        | ...  | TPS | D   | ...  | H     | AR    | GL    | 187 |     |     |
| AAQ63084     | 138 | ...         | E   | ...  | N    | ... | S    | IMYRKF | SAPC   | -    | VYF  | PPRNATME | H        | ...      | TPS  | D   | ... | V    | L     | AHQGL | 190   |     |     |     |
| XP 001508375 | 292 | T           | ... | Q    | ...  | N   | ...  | S      | I      | HRKF | NAPC | -        | VYF      | PPRNATMA | Q    | ... | T   | DL   | HP    | T     | CQKL  | 345 |     |     |
| AAQ63087     | 142 | ...         | E   | ...  | N    | ... | S    | IMYRKF | SAPC   | -    | KVYF | PPRNATME | H        | ...      | TPS  | D   | ... | L    | AH    | GL    | 194   |     |     |     |
| AAQ63075     | 128 | ...         | E   | ...  | N    | ... | S    | IMYRKF | SAPC   | -    | VYF  | PPRNATME | H        | ...      | TAS  | D   | ... | LP   | S     | HQGL  | 180   |     |     |     |
| AAQ63080     | 140 | ...         | E   | ...  | N    | ... | S    | IMYRKF | SAPC   | -    | VYF  | PPRNATME | H        | ...      | TPS  | D   | ... | L    | VH    | GL    | 192   |     |     |     |
| AAP76422     | 134 | ...         | E   | ...  | N    | ... | S    | IMHRKF | SAPC   | -    | VYF  | PPRNATME | H        | ...      | TPS  | D   | ... | H    | VR    | GL    | 186   |     |     |     |
| AAQ63086     | 142 | ...         | E   | ...  | N    | ... | S    | IMYRKF | -      | APC  | -    | VYF      | PPRNATME | H        | ...  | TPS | D   | ...  | L     | AHQGL | 193   |     |     |     |
| AAP76415     | 111 | T           | ... | E    | ...  | N   | ...  | S      | IMHRKF | SAPC | -    | VYF      | PPRNAIME | H        | ...  | APS | D   | ...  | H     | AR    | GL    | 164 |     |     |
| O867B5       | 170 | ...         | E   | ...  | N    | ... | S    | FMHRKF | STPC   | -    | VYF  | SPRNAAME | H        | ...      | T    | N   | ... | D    | HTAR  | GL    | 222   |     |     |     |
| ABS32179     | 135 | T           | ... | Q    | ...  | N   | ...  | S      | I      | HRKF | NAPC | -        | VYF      | PPRNATMA | Q    | ... | T   | DL   | HP    | T     | PROKL | 188 |     |     |
| AAQ63088     | 141 | ...         | E   | ...  | N    | ... | S    | IMYRKF | SAPC   | -    | KVYF | PPRNATME | Y        | ...      | APS  | D   | ... | L    | AH    | GL    | 193   |     |     |     |
| AAP76420     | 134 | ...         | E   | ...  | N    | ... | S    | IMHRKF | SAPC   | -    | VYF  | PPRNATME | H        | ...      | TPS  | D   | ... | HSLL | GL    | 186   |       |     |     |     |
| AAQ63074     | 136 | ...         | E   | ...  | N    | ... | S    | IMYRKF | SAPC   | -    | VYF  | PPRNATME | H        | ...      | TAS  | D   | ... | LP   | S     | HQGL  | 188   |     |     |     |
| AAK19233     | 130 | ...         | E   | ...  | N    | ... | S    | FMHRKF | SAPC   | -    | VYF  | CPKSVTME | H        | ...      | TPS  | D   | ... | HAAR | GL    | 222   |       |     |     |     |
| ABI74735     | 151 | ...         | Q   | ...  | N    | ... | S    | IMYGRF | N      | SP   | -    | Y        | VYF      | PPRNATIE | H    | ... | TPS | D    | ...   | QAAR  | GL    | 203 |     |     |
| ABI74702     | 151 | ...         | Q   | ...  | N    | ... | S    | IMYGRF | N      | SP   | -    | Y        | VYF      | PPRNATIE | H    | ... | TPS | D    | ...   | HAAR  | GL    | 203 |     |     |
| ABI74737     | 151 | ...         | Q   | ...  | N    | ... | S    | IMYGRF | N      | SP   | -    | Y        | VYF      | PPRNATIE | H    | ... | TPS | D    | ...   | QAAR  | GL    | 203 |     |     |
| ABI74738     | 151 | ...         | Q   | ...  | N    | ... | S    | IMYGRF | N      | SP   | -    | Y        | VYF      | PPRNATIE | H    | ... | TPS | D    | ...   | QAAR  | GL    | 203 |     |     |
| AAP76413     | 134 | ...         | E   | ...  | N    | ... | S    | IMHRKF | RAPC   | -    | VYF  | PPRNATME | H        | ...      | APS  | D   | ... | HAAR | GL    | 186   |       |     |     |     |
| AAQ63081     | 141 | ...         | E   | ...  | S    | ... | S    | IMYRKF | SAPC   | -    | VYF  | PPRNVTTE | H        | ...      | TPS  | D   | ... | L    | AH    | GL    | 193   |     |     |     |
| ABI74720     | 151 | ...         | Q   | ...  | N    | ... | S    | IMYGRF | N      | SP   | -    | Y        | VYF      | PPRNATIE | H    | ... | TPS | D    | ...   | QAAR  | GL    | 203 |     |     |
| AAQ63076     | 134 | ...         | E   | ...  | S    | ... | G    | MYRKF  | SAPC   | -    | VYF  | PPRNATME | H        | ...      | TPS  | D   | ... | LP   | AH    | GL    | 186   |     |     |     |
| AAQ63067     | 133 | ...         | E   | ...  | N    | ... | S    | IMHRKF | SAH    | ...  | -    | VYF      | PPRNVT   | E        | H    | ... | TPS | D    | ...   | F     | AH    | GL  | 185 |     |
| AAP76429     | 138 | ...         | E   | ...  | QN   | ... | S    | IMHRKF | SAP    | -    | -    | VYF      | PPRNATME | R        | ...  | TPS | D   | ...  | HAAR  | GL    | 191   |     |     |     |
| AAP76416     | 138 | ...         | E   | ...  | N    | ... | S    | IMHRKF | SAPC   | -    | VYF  | PPRNATME | H        | ...      | APS  | D   | ... | H    | AR    | GL    | 49    |     |     |     |
| AAP76398     | 126 | T           | ... | E    | ...  | N   | ...  | S      | IMHRKF | SAPC | -    | VYF      | PPRNATME | H        | ...  | TPS | D   | ...  | LN    | AH    | GL    | 179 |     |     |
| AAV88340     | 136 | ...         | E   | ...  | N    | ... | S    | IMHRKF | SAH    | ...  | -    | VYF      | PPRNVT   | E        | H    | ... | TPS | D    | ...   | F     | AH    | GL  | 188 |     |
| AAQ63068     | 134 | ...         | E   | ...  | N    | ... | S    | IMHRKF | SAH    | ...  | -    | VYF      | PPRNVT   | E        | H    | ... | TPS | D    | ...   | F     | AH    | GL  | 186 |     |
| ABI74722     | 149 | ...         | Q   | ...  | N    | ... | S    | IMYGRF | N      | SP   | -    | Y        | VYF      | PPRNATIE | H    | ... | TPS | D    | ...   | QAAR  | GL    | 203 |     |     |
| AAP76424     | 134 | ...         | E   | ...  | QN   | ... | S    | IMHRKF | SAPC   | -    | VYF  | PPRNATME | X        | ...      | TPS  | N   | ... | H    | AHQGL | 186   |       |     |     |     |
| ABI74732     | 151 | ...         | Q   | ...  | N    | ... | S    | IMYGRF | N      | SP   | -    | Y        | VYF      | PPRNATIE | H    | ... | TPS | D    | ...   | QAAR  | GL    | 203 |     |     |
| ABI74707     | 151 | ...         | Q   | ...  | N    | ... | S    | IMYGRF | N      | SP   | -    | Y        | VYF      | PPRNATIE | H    | ... | TPS | D    | ...   | QAAR  | GL    | 203 |     |     |
| ABI74734     | 151 | ...         | Q   | ...  | N    | ... | S    | IMYGRF | N      | SP   | -    | Y        | VYF      | PPRNATIE | H    | ... | TPS | D    | ...   | QAAR  | GL    | 203 |     |     |
| ABI74705     | 151 | ...         | Q   | ...  | N    | ... | S    | IMYGRF | N      | SP   | -    | Y        | VYF      | PPRNATIE | H    | ... | TPS | D    | ...   | QAAR  | GL    | 203 |     |     |
| ABI74733     | 151 | ...         | Q   | ...  | N    | ... | S    | IMYGRF | N      | SP   | -    | Y        | VYF      | PPRNATIE | H    | ... | TPS | D    | ...   | QAAR  | GL    | 203 |     |     |
| ABI74723     | 149 | ...         | Q   | ...  | N    | ... | S    | IMYGRF | N      | SP   | -    | Y        | VYF      | PPRNATIE | H    | ... | TPS | D    | ...   | QAAR  | GL    | 201 |     |     |
| ABI74719     | 151 | ...         | Q   | ...  | N    | ... | S    | IMYGRF | N      | SP   | -    | Y        | VYF      | PPRNATIE | H    | ... | TPS | D    | ...   | QAAR  | GL    | 203 |     |     |
| AAV88326     | 136 | ...         | E   | ...  | N    | ... | S    | IMHRKF | SAH    | ...  | -    | VYF      | PPRNVT   | E        | H    | ... | TPS | D    | ...   | F     | AH    | GL  | 188 |     |
| ABI74724     | 149 | ...         | Q   | ...  | N    | ... | S    | IMYGRF | N      | SP   | -    | Y        | VYF      | PPRNATIE | H    | ... | TPS | D    | ...   | QAAR  | GL    | 201 |     |     |
| ABI74710     | 151 | ...         | Q   | ...  | N    | ... | S    | IMYGRF | N      | SP   | -    | Y        | VYF      | PPRNATIE | H    | ... | TPS | D    | ...   | QAAR  | GL    | 203 |     |     |
| ABI74725     | 151 | ...         | Q   | ...  | N    | ... | S    | IMYGRF | N      | SP   | -    | Y        | VYF      | PPRNATIE | H    | ... | APS | D    | ...   | QAAR  | GL    | 203 |     |     |
| ABI74726     | 151 | ...         | Q   | ...  | N    | ... | S    | IMYGRF | N      | SP   | -    | Y        | VYF      | PPRNATIE | H    | ... | APS | D    | ...   | QAAR  | GL    | 203 |     |     |
| AAQ63077     | 137 | ...         | E   | ...  | N    | ... | S    | IMYRKF | SAPC   | -    | AYF  | PPRNATME | H        | ...      | TPS  | N   | ... | LP   | AH    | GL    | 189   |     |     |     |
| ABI74731     | 151 | ...         | Q   | ...  | N    | ... | S    | IMYGRF | N      | SP   | -    | Y        | VYF      | PPRNATIE | H    | ... | TPS | D    | ...   | QAAR  | GL    | 203 |     |     |
| ABI74713     | 151 | ...         | Q   | ...  | N    | ... | S    | IMYGRF | N      | SP   | -    | Y        | VYF      | PPRNATIE | H    | ... | TPS | D    | ...   | QAAR  | GL    | 203 |     |     |
| ABI74712     | 151 | ...         | Q   | ...  | N    | ... | S    | IMYGRF | N      | SP   | -    | Y        | VYF      | PPRNATIE | H    | ... | TPS | D    | ...   | QAAR  | GL    | 203 |     |     |
| ABI74716     | 151 | ...         | Q   | ...  | N    | ... | S    | IMYGRF | N      | SP   | -    | Y        | VYF      | PPRNATIE | H    | ... | APS | D    | ...   | QAAR  | GL    | 203 |     |     |
| AAP76438     | 133 | T           | ... | E    | ...  | QN  | ...  | S      | IMHRKF | SAP  | -    | H        | GYF      | PRKET    | E    | H   | ... | TPS  | D     | ...   | H     | AR  | GL  | 186 |
| ABI74715     | 151 | ...         | Q   | ...  |      |     |      |        |        |      |      |          |          |          |      |     |     |      |       |       |       |     |     |     |

|              |     |      |      |     |              |         |            |    |         |          |          |     |     |
|--------------|-----|------|------|-----|--------------|---------|------------|----|---------|----------|----------|-----|-----|
| ABI74717     | 151 | ...  | Q... | N.  | NIMYGRF      | NSP-Y   | VYFPRNATXE | H. | TPS.D.  | RAAR     | GL.      | 203 |     |
| ABI74736     | 151 | ...  | Q... | N.  | NIMYGRF      | NSP-Y   | VYFPRNATIE | H. | TPS.DV. | QAARGGL. |          | 203 |     |
| XP 001365035 | 293 | ...  | Q... | N.  | NIMYGRF      | NSP-H   | VYFPRNATIE | H. | TPS.D.  | QAARWGL. |          | 245 |     |
| AA851657     | 174 | ...  | Q... | N.  | NIMYGRF      | NSP-H   | VYFPRNATIE | H. | TPS.D.  | QAARWGL. |          | 326 |     |
| AA588339     | 132 | ...  | E... | N.  | SIMHRKF      | SAH.    | VYFPRSVT   | E. | TPS.D.  | F.AH     | GL.      | 184 |     |
| AA588328     | 136 | ...  | E... | YN. | SIMHRKF      | SAH.    | VYFPRNVT   | E. | TPS.D.  | F.AH     | GL.      | 188 |     |
| ABI74700     | 151 | ...  | K... | N.  | NIMYGRF      | NSP-Y   | VYFPRNATIE | H. | MPS.D.  | QAARQGL. |          | 203 |     |
| AA41962      | 140 | ...  | E... | N.  | SIMYRKF      | SAPC-KV | VYFPRNATME | H. | TPS.D.  | L.AH     | GL.      | 192 |     |
| ABB48313     | 139 | ...  | E... | N.  | RILYRKF      | SAPC-VH | VYFPRNATME | H. | TPS.D.  | H.AROGL. |          | 191 |     |
| ABI74729     | 151 | ...  | Q... | N.  | NIMYGRF      | NSP-H   | VYFPRNATIE | H. | MPS.D.  | QAAR     | GL.      | 203 |     |
| AA76403      | 133 | ...  | E... | N.  | IIMYRKF      | SAPC-VH | VYFPRNATME | H. | TAS.D.  | LPNHQGL. |          | 185 |     |
| AA588332     | 133 | ...  | E... | N.  | SIMHRKF      | SAH.    | VYFPRNVT   | E. | Q.      | TPS.D.   | FAAH     | GL. | 185 |
| AA588329     | 136 | V... | E... | N.  | SIMHRKF      | SAH.    | VYFPRNVT   | E. | H.      | TPS.D.   | F.AR     | GL. | 188 |
| ABB48312     | 139 | ...  | E... | N.  | RILYRKF      | SAP-R   | VYFPRNAIME | H. | TPS.D.  | H.AROGL. |          | 191 |     |
| AA063082     | 141 | ...  | E... | N.  | IIMYRKF      | SAPC-VH | VYFPRNATME | H. | TPS.D.  | L.AHPGL. |          | 193 |     |
| AA588342     | 136 | ...  | E... | N.  | SIMHRKF      | SAH.RI  | VYFPRKVT   | E. | H.      | TPS.D.   | F.AH     | GL. | 188 |
| ABX71992     | 137 | ...  | E... | QN. | SIMHRKF      | SAP-    | IYFPRNATME | R. | TPS.D.  | HAAR     | GL.      | 190 |     |
| AA76436      | 137 | ...  | E... | QN. | SIMHRKF      | GTP-R   | GYFQRNVTME | H. | TPS.D.  | H.AR     | GL.      | 189 |     |
| ABI74701     | 151 | ...  | Q... | N.  | NIMYGRF      | NSP-Y   | VYFPRNATIE | H. | MPS.D.  | QAARQGL. |          | 203 |     |
| ABI74740     | 151 | ...  | Q... | N.  | NIMYGRF      | NSP-Y   | VYFPRNATIE | H. | TPS.D.  | QAARGL.  |          | 203 |     |
| P15919       | 169 | ...  | E... | D.  | SIMHRKF      | SSH.    | VYFPRKVT   | E. | H.      | TPS.D.   | F.AH     | GL. | 221 |
| AA588327     | 136 | ...  | E... | YN. | SIMHRKF      | SVH.    | VYFPRNVT   | E. | H.      | TPS.D.   | F.AH     | GL. | 188 |
| AA76432      | 125 | ...  | Q... | QN. | GIMHRKF      | SAP-R   | VYFPRNATME | H. | TPS.D.  | H.AR     | GL.      | 177 |     |
| NP 033045    | 169 | ...  | E... | D.  | SIMHRKF      | SSH.    | VYFPRKVT   | E. | H.      | TPS.D.   | F.AH     | GL. | 221 |
| AA76404      | 139 | ...  | E... | N.  | IIMYRKF      | SAP-R   | VYFPRNATIE | H. | TPS.D.  | L.AH     | GL.      | 191 |     |
| ABI74730     | 151 | ...  | Q... | N.  | NIMYGRF      | NSL-Y   | VYFPRNATIE | H. | TPS.D.  | QAAR     | GL.      | 203 |     |
| AA41960      | 140 | ...  | E... | N.  | SIMYRKF      | SAPC-KV | VYFPRNATME | H. | TPS.D.  | L.AH     | GL.      | 192 |     |
| AA41958      | 140 | ...  | E... | N.  | SIMYRKF      | SAPC-KV | VYFPRNATME | H. | TPS.D.  | L.AH     | GL.      | 192 |     |
| ABI74709     | 151 | ...  | Q... | N.  | NIMYGRF      | NSP-Y   | VYFPRNATIE | H. | TPS.D.  | QAARWGL. |          | 203 |     |
| ABI74727     | 151 | ...  | Q... | N.  | MYGRF        | NSP-Y   | VYFPRNATIE | H. | APS.DV. | QAAR     | GL.      | 203 |     |
| AA063078     | 132 | ...  | E... | N.  | SIMYRKF      | SAPC-VH | VYFPRKATIE | H. | TPS.D.  | LPHTHGL. |          | 184 |     |
| AA063061     | 138 | ...  | E... | N.  | SIMHRKF      | SAH.    | VYFPRNVT   | E. | H.      | TPS.DV.  | F.AHPGL. |     | 190 |
| AA12378      | 12  | ...  | E... | N.  | SIMHRKF      | SAPC-VH | VYFPRNATME | H. | TPS.D.  | H.AROGL. |          | 64  |     |
| AA12390      | 12  | ...  | E... | N.  | SIMHRKF      | SAPC-VH | VYFPRNATME | H. | TPS.D.  | H.AHQGL. |          | 64  |     |
| ABS32177     | 66  | ...  | Q... | N.  | S.MYARF      | NAPC-VH | VYFPRNASIE | H. | TPS.D.  | QAAR     | GL.      | 118 |     |
| ABX72002     | 137 | ...  | E... | QN. | SIMHRKF      | SAP-    | IYFPRNATIE | R. | TPS.D.  | HAAR     | GL.      | 190 |     |
| ABX71993     | 137 | ...  | E... | QN. | SIMHRKF      | SAP-    | IYFPRNATME | R. | TPS.D.  | HAAR     | GL.      | 190 |     |
| ABX71997     | 137 | ...  | E... | QN. | SIMHRKF      | SAP-    | IYFPRNATME | R. | TPS.D.  | HAAR     | GL.      | 190 |     |
| AA41959      | 128 | ...  | E... | N.  | SIMYRKF      | SAPC-KV | VYFPRNATME | H. | TPS.D.  | L.AH     | GL.      | 180 |     |
| AA41963      | 140 | ...  | E... | N.  | SIMYRKF      | SAPC-KV | VYFPRNATME | H. | TPS.D.  | L.AH     | GL.      | 192 |     |
| ABB48310     | 139 | ...  | E... | K.  | SIMYRKF      | SAP-R   | VYFPRNATME | H. | TPS.D.  | H.AHQGR. |          | 191 |     |
| AA76437      | 136 | ...  | E... | QN. | SIMHRKF      | SAP-H   | GYFQRKET   | E. | H.      | PS.D.    | HAAR     | GL. | 188 |
| ABI74706     | 151 | ...  | Q... | YN. | NIMYGRF      | NSP-Y   | VYFPRNATIE | H. | TPS.D.  | QAAR     | GL.      | 203 |     |
| ABX72018     | 137 | ...  | E... | QN. | SIMHRKF      | SAP-    | IYFPRNATIE | R. | TPS.D.  | HAAR     | GL.      | 190 |     |
| AA41961      | 140 | ...  | E... | N.  | SIMYRKF      | SAPC-KV | VYFPRNATME | H. | TPS.D.  | LXAH     | GL.      | 192 |     |
| AA41991      | 142 | ...  | E... | N.  | SIMYRKF      | SAPC-KV | VYFPRNATME | H. | TPS.D.  | L.AH     | GL.      | 194 |     |
| AA42034      | 138 | ...  | E... | N.  | SIMYRKF      | SAPC-KV | VYFPRNATME | H. | TPS.D.  | L.AH     | GL.      | 190 |     |
| AA42017      | 140 | ...  | E... | N.  | SIMYRKF      | SAPC-KV | VYFPRNATME | H. | TPS.D.  | L.AH     | GL.      | 192 |     |
| AA063073     | 133 | ...  | E... | N.  | LIMH.KF      | SAHC-VH | VYFPRVVT   | E. | H.      | TPS.DV.  | L.AH     | GL. | 185 |
| AA42024      | 140 | ...  | E... | N.  | SIMYRKF      | SAPC-KV | VYFPRNATME | H. | TPS.D.  | L.AH     | GL.      | 192 |     |
| AA41956      | 140 | ...  | E... | N.  | SIMYRKF      | SAPC-KV | VYFPRNATME | Y. | TPS.D.  | L.AHQGL. |          | 192 |     |
| AA42029      | 140 | ...  | E... | N.  | SIMYRKF      | SAPC-KV | VYFPRNATME | H. | TPS.D.  | L.AH     | GL.      | 192 |     |
| AA41976      | 146 | ...  | E... | N.  | SIMYRKF      | SAPC-KV | VYFPRNATME | H. | TPS.D.  | L.AH     | GL.      | 198 |     |
| AA41975      | 146 | ...  | E... | N.  | SIMYRKF      | SAPC-KV | VYFPRNATME | H. | TPS.D.  | L.AH     | GL.      | 198 |     |
| AA42031      | 139 | ...  | E... | N.  | SIMYRKF      | SAPC-KV | VYFPRNATME | H. | TPS.D.  | L.AH     | GL.      | 191 |     |
| AA42032      | 139 | ...  | E... | N.  | SIMYRKF      | SAPC-KV | VYFPRNATME | H. | TPS.D.  | L.AH     | GL.      | 191 |     |
| AA41973      | 137 | ...  | E... | N.  | SIMYRKF      | SAPC-KV | VYFPRNATME | H. | TPS.D.  | L.AH     | GL.      | 189 |     |
| AA42016      | 140 | ...  | E... | N.  | SIMYRKF      | SAPC-KV | VYFPRNATME | H. | TPS.D.  | L.AH     | GL.      | 192 |     |
| AA42019      | 140 | ...  | E... | N.  | SIMYRKF      | SAPC-KV | VYFPRNATME | H. | TPS.D.  | L.AH     | GL.      | 192 |     |
| AA42025      | 140 | ...  | E... | N.  | SIMYRKF      | SAPC-KV | VYFPRNATME | H. | TPS.D.  | L.AH     | GL.      | 192 |     |
| AA41990      | 142 | ...  | E... | N.  | SIMYRKF      | SAPC-KV | VYFPRNATME | H. | TPS.D.  | L.AH     | GL.      | 194 |     |
| AA42005      | 139 | ...  | E... | N.  | SIMYRKF      | SAPC-KV | VYFPRNATME | H. | TPS.D.  | L.AH     | GL.      | 191 |     |
| AA42006      | 140 | ...  | E... | N.  | SIMYRKF      | SAPC-KV | VYFPRNATME | H. | TPS.D.  | L.AH     | GL.      | 192 |     |
| AA41994      | 140 | ...  | E... | N.  | SIMYRKF      | SAPC-KV | VYFPRNATME | H. | TPS.D.  | L.AH     | GL.      | 192 |     |
| AA097258     | 89  | ...  | Q... | N.  | RIMHRRF      | SAPC-VH | VYFPRNTTME | H. | PS.D.   | HSTR     | GL.      | 141 |     |
| ABX72017     | 137 | ...  | E... | QN. | SIMHRKF      | SAP-    | IYFPRNATIE | R. | TPS.D.  | HAAR     | GL.      | 190 |     |
| AA41966      | 140 | ...  | E... | N.  | SIMYRKF      | SAPC-KV | VYFPRNATME | H. | TPS.D.  | L.AH     | GL.      | 192 |     |
| AA41970      | 140 | ...  | E... | N.  | SIMYRKF      | SAPC-KV | VYFPRNATME | H. | TPS.D.  | L.AH     | GL.      | 192 |     |
| AA42014      | 133 | ...  | E... | N.  | SIMYRKF      | SAPC-KV | VYFPRNATME | H. | TPS.D.  | L.AH     | GL.      | 185 |     |
| AA41977      | 140 | ...  | E... | N.  | SIMYRKF      | SAPC-KV | VYFPRNATME | H. | TPS.D.  | L.AH     | GL.      | 192 |     |
| AA41981      | 141 | ...  | E... | N.  | SIMYRKF      | SAPC-KV | VYFPRNATME | H. | TPS.D.  | L.AH     | GL.      | 193 |     |
| ABS32180     | 137 | ...  | E... | N.  | SIMHRKF      | HAP-    | IYFPRNATIE | HA | TPS.D.  | HAAR     |          | 186 |     |
| AA41969      | 137 | ...  | E... | N.  | SIMYRKF      | SAPC-KV | VYFPRNATME | H. | TPS.D.  | L.AH     | GL.      | 189 |     |
| AA41984      | 141 | ...  | E... | N.  | SIMYRKF      | SAPC-KV | VYFPRNATME | H. | TPS.D.  | L.AH     | GL.      | 193 |     |
| AA41993      | 139 | ...  | E... | N.  | SIMYRKF      | SAPC-KV | VYFPRNATME | H. | TPS.D.  | L.AH     | GL.      | 191 |     |
| AA41995      | 140 | ...  | E... | N.  | SIMYRKF      | SAPC-KV | VYFPRNATME | H. | TPS.D.  | L.AH     | GL.      | 192 |     |
| AA41954      | 140 | ...  | E... | N.  | SIMYRKF      | SAPC-KV | VYFPRNATME | Y. | TPS.D.  | L.AHQGL. |          | 192 |     |
| AA42011      | 140 | ...  | E... | N.  | SIMYRKF      | SAPC-KV | VYFPRNATME | H. | TPS.D.  | L.AH     | GL.      | 192 |     |
| AA41985      | 134 | ...  | E... | N.  | SIMYRKF      | SAPC-KV | VYFPRNATME | H. | TPS.D.  | L.AH     | GL.      | 186 |     |
| AA42033      | 140 | ...  | E... | N.  | SIMYRKF      | SAPC-KV | VYFPRNATME | H. | TPS.D.  | L.AH     | GL.      | 192 |     |
| XP 230375    | 169 | ...  | E... | N.  | SIMHRKFGSAH. | VH      | VYFPRNVT   | E. | H.      | TPS.D.   | F.AH     | GL. | 221 |
| AA41967      | 107 | ...  | E... | N.  | SIMYRKF      | SAPC-KV | VYFPRNATME | H. | TPS.D.  | L.AH     | GL.      | 159 |     |
| AA42000      | 133 | ...  | E... | N.  | SIMYRKF      | SAPC-KV | VYFPRNATME | H. | TPS.D.  | L.AH     | GL.      | 185 |     |
| AA41992      | 127 | ...  | E... | N.  | SIMYRKF      | SAPC-KV | VYFPRNATME | H. | TPS.D.  | L.AH     | GL.      | 179 |     |
| AA42018      | 133 | ...  | E... | N.  | SIMYRKF      | SAPC-KV | VYFPRNATME | H. | TPS.D.  | L.AH     | GL.      | 185 |     |
| AA41986      | 134 | ...  | E... | N.  | SIMYRKF      | SAPC-KV | VYFPRNATME | H. | TPS.D.  | L.AH     | GL.      | 186 |     |
| AA41998      | 133 | ...  | E... | N.  | SIMYRKF      | SAPC-KV | VYFPRNATME | H. | TPS.D.  | L.AH     | GL.      | 185 |     |
| AA057543     | 6   | V... | E... | N.  | RIMH.KF      | GAPC-VH | VYFPRNATIE | H. | APS.D.  | Y.AR     | GL.      | 58  |     |
| ABX72013     | 137 | ...  | E... | QN. | SIMHRKF      | SAP-    | IYFPRNATIE | R. | TPS.D.  | HAAR     | GL.      | 190 |     |
| ABX72009     | 137 | ...  | E... | QN. | SIMHRKF      | SAP-    | IYFPRNATME | R. | TPS.D.  | HAAR     | GL.      | 190 |     |
| ABX72005     | 137 | ...  | E... | QN. | SIMHRKF      | SAP-    | IYFPRNATME | R. | TPS.D.  | HAAR     | GL.      | 190 |     |
| AA588338     | 132 | ...  | E... | N.  | SIMHRKF      | SAHG-VH | VYFPRNVT   | E. | H.      | TPS.D.   | FAAH     | GL. | 184 |
| ABX72010     | 137 | ...  | E... | QN. | SIMHRKF      | SAP-    | IYFPRNATIE | R. | TPS.D.  | HAAR     | GL.      | 190 |     |
| ABX72004     | 137 | ...  | E... | QN. | SIMHRKF      | SAP-    | IYFPRNATME | R. | TPS.D.  | HAAR     | GL.      | 190 |     |
| ABX71996     | 137 | ...  | E... | QN. | SIMHRKF      | SXP-    | IYFPRNATIE | R. | TPS.D.  | HAAR     | GL.      | 190 |     |
| AA41987      | 133 | ...  | E... | N.  | SIMYRKF      | SAPC-KV | VYFPRNATME | H. | TPS.D.  | L.AH     | GL.      | 185 |     |
| AA588317     | 135 | ...  | E... | N.  | IIMYRKF      | SAHC-VH | VYFPRITT   | E. | H.      | TPS.D.   | L.AROGL. |     | 187 |
| AA41957      | 127 | ...  | E... | N.  | SIMYRKF      | SAPC-KV | VYFPRNATME | H. | TPA.D.  | L.AH     | GL.      | 179 |     |
| AA591502     | 89  | ...  | E... | N.  | RIMHRRF      | SAPC-VH | VYFPRNTTME | H. | PS.D.   | HSTR     | GL.      | 141 |     |
| AA097257     | 89  | ...  | E... | N.  | RIMHRRF      | SAPC-VH | VYFPRNTTME | H. | PS.D.   | HSTR     | GL.      | 141 |     |
| AA41989      | 54  | ...  | E... | N.  | SIMYRKF      | SAPC-KV | VYFPRNATME | H. | TPS.D.  | L.AH     | GL.      | 106 |     |
| AA41997      | 139 | ...  | E... | N.  | SIMYRKF      | SAPC-KV | VYFPRNATME | H. | TPS.D.  | L.AH     | GL.      | 191 |     |
| AA41968      | 139 | ...  | E... | N.  | SIMYRKF      | SAPC-KV | VYFPRNATME | H. | TPS.D.  | L.AH     | GL.      | 191 |     |

|           |     |          |         |                  |                    |                    |     |
|-----------|-----|----------|---------|------------------|--------------------|--------------------|-----|
| AAQ97249  | 89  | ...      | E...N   | RIMHRRF          | SAPC-VYFPRNTTME    | H...PS.D..HSTR.GL  | 141 |
| AAQ97246  | 89  | ...      | E...N   | RIMHRRF          | SAPC-VYFPRNTTME    | H...PS.D..HSTR.GL  | 141 |
| AAQ97247  | 89  | ...      | E...N   | RIMHRRF          | SAPC-VYFPRNTTME    | H...PS.D..HSTR.GL  | 141 |
| AA419555  | 113 | ...      | E...N   | SIMYRKF          | SAPC-KVYFPRNTTME   | H.TPS.D..L.AH.GL   | 165 |
| AAQ97248  | 89  | ...      | E...N   | RIMHRRF          | SAPC-VYFPRNTTME    | H...PS.D..HSTR.GL  | 141 |
| ABI74703  | 151 | ...      | Q...N   | NIMYGRF          | HSP-Y.VYFPRNTATLE  | H.TPS.D..QAAL.GL   | 203 |
| AAQ97254  | 89  | ...      | E...N   | RIMHRRF          | SAPC-VYFPRNTTME    | H...PS.D..HSTR.GL  | 141 |
| AAQ63064  | 138 | ...      | E...N   | SIMYRKF          | SAH...VYFPRNVT.E   | H.TPS.N..F.AHPGL   | 190 |
| AA42036   | 140 | ...      | E...N   | SIMYRKF          | SAPC-KVYFPRNTTME   | ...TPS.D..L.AH.GL  | 192 |
| AA88330   | 128 | ...      | E...N   | SIMYRKF          | SAH...VYFPRNVT.E   | H.TPS.N..F.AHPGL   | 180 |
| AAQ97255  | 89  | ...      | E...N   | RIMHRRF          | SAPC-VYFPRNTTME    | H...PS.D..HSTR.GL  | 141 |
| AA42037   | 140 | ...      | E...N   | SIMYRKF          | SAPC-KVYFPRNTTME   | ...TPS.D..L.AH.GL  | 192 |
| AA476405  | 138 | ...      | E...N   | SIMYRKF          | SAPC-VYFPRNTTME    | ...TPS.D..L.AH.GL  | 190 |
| AAQ97245  | 89  | ...      | E...N   | RIMHRRF          | SAPC-VYFPRNTTME    | H...PS.D..HSTR.GL  | 141 |
| AAQ63056  | 138 | ...      | E..QN   | RIMYRKF          | GAPC-VYFPRNTTME    | N.TPS.D..HRAH.GL   | 190 |
| AA41988   | 141 | ...      | E...N   | SIMYRKF          | SAPC-KVYFPRNTTME   | ...TPS.D..L.AH.GL  | 193 |
| AAT28181  | 88  | ...      | E...N   | RIMHRRF          | SAPC-VYFPRNTTME    | H...PS.D..HSTR.GL  | 140 |
| AAQ97262  | 89  | ...      | E...N   | RIMHRRF          | SAPC-VYFPRNTTME    | H...PS.D..HSTR.GL  | 141 |
| AAT28182  | 88  | ...      | E...N   | RIMHRRF          | SAPC-VYFPRNTTME    | H...PS.D..HSTR.GL  | 140 |
| AAT28175  | 88  | ...      | E...N   | RIMHRRF          | SAPC-VYFPRNTTME    | H...PS.D..HSTR.GL  | 140 |
| ABI74704  | 151 | ...      | Q...N   | NIMYGRF          | HSP-Y.VYFPRNTATLE  | H.TPS.D..QAARXGL   | 203 |
| AA488344  | 136 | ...      | E...H   | SIMYRKF          | SAH-ROVCFPRNVT.E   | H.TPS.D..F.AH.GL   | 188 |
| AAQ63062  | 132 | ...      | E...NX  | SIMHRKF          | SAH...VYFPRNVT.E   | H.TPS.D..F.AX.GL   | 184 |
| AA488324  | 134 | ...      | E...N   | SIMHRKF          | SAH...VYCPNVT.E    | H.TPS.N..F.AH.EL   | 186 |
| AA41972   | 140 | ...      | E...N   | SIMYRKF          | SAPC-KVYFPRNTTME   | ...TPS.D..L.AH.GL  | 192 |
| ABI74739  | 151 | V..      | Q...N   | NIMYGRF          | HSPC-VYFPRNTTME    | H.TPS.D..QAAL.GL   | 203 |
| AAT28179  | 88  | ...      | E...N   | RIMHRRF          | SAPC-VYFPRNTTME    | H...PS.D..HSTR.GL  | 140 |
| AA488341  | 136 | ...      | E...N   | SIMHRKF          | SAH...X.VYFSRNVT.E | H.TPS.D..F.AHPGL   | 188 |
| ABS32175  | 139 | ...      | Q..YN   | N.MYGRF          | NNPC-VYFPRNTAITE   | H.TPS.D..QAAR.GL   | 191 |
| AAP12381  | 12  | ...      | E...N   | RILYRKF          | SAP-R.VYFPRNTTME   | H.TPS.D..H.AROGL   | 174 |
| AA42010   | 126 | ...      | E...N   | SIMYRKF          | SAPC-KVYFPRNTTME   | ...TPS.D..L.AH.GL  | 168 |
| AAP12385  | 12  | ...      | E...N   | SIMYRKF          | RAPC-VYFPRNTTME    | H.TPS.D..YAAH.XL   | 64  |
| AAQ97261  | 89  | ...      | E...N   | RIMHRRF          | SAPC-VYFPRNTTME    | H...PS.D..HSTRQGL  | 141 |
| AA488323  | 131 | ...      | E...N   | SIMHRKF          | SAH...VYCPNVT.E    | H.TPS.D..F.AH.EL   | 183 |
| AAQ97251  | 89  | ...      | E...N   | RIMHRRF          | SAPC-VYFPRNTTME    | H...PS.D..HSTR.GL  | 141 |
| AA488318  | 136 | ...      | E...N   | V.MYRKF          | SAHC-VYFPRNTTME    | H.TPS.D..L.AROGL   | 188 |
| AAP76397  | 131 | T..      | E...N   | RIMYRKF          | SA-R.VYFPRNTTME    | H.TPS.D..LSAHOGL   | 184 |
| AAQ97264  | 89  | ...      | E...N   | RIMHRRF          | SAPC-VYFPRNTTME    | H...PS.D..HSTR.GL  | 141 |
| AAQ97265  | 89  | ...      | E...N   | RIMHRRF          | SAPC-VYFPRNTTME    | R...PS.D..YSTRQGL  | 141 |
| AAQ63066  | 133 | V..      | E...N   | SIMHRKF          | SAH...VYFPRNVT.E   | H.TPS.N..F.AH.GL   | 185 |
| ABX72021  | 137 | ...      | E..QN   | SIMHRKF          | SAP...VYFPRNTTME   | R.TPS.D..HAAR.GL   | 190 |
| AAQ97263  | 89  | ...      | E...N   | GIMHRRF          | SAPC-VYFPRNTTME    | H...PS.D..HSTR.GL  | 141 |
| AAP76434  | 113 | ...      | E..QN   | SIMHRKF          | SGP-RDIIHFQRNVTME  | H.TAS.D..H.AH.GL   | 165 |
| AAQ97256  | 89  | V..      | E...N   | RIMHRRF          | SAPC-VYFPRNTTME    | H...PS.D..HSTR.GL  | 141 |
| AAQ63069  | 64  | ...      | E...N   | I.MYRKF          | SAHC-VYFPRNTTME    | H.TPS.D..L.AROGL   | 116 |
| ABX72028  | 137 | ...      | E..QN   | SIMHRKF          | SAP...VYFPRNTTME   | R.TPS.D..HAAR.GL   | 190 |
| AA41971   | 140 | ...      | E...N   | XIMYRKF          | SAPC-KVYFPRNTTME   | ...TPS.D..L.AH.GL  | 192 |
| AA42001   | 140 | ...      | E...N   | SIMYRKF          | SAPC-KVYFPRNTTME   | ...TPS.D..L.AH.GL  | 192 |
| AA41999   | 140 | ...      | E...N   | SIMYRKF          | SAPC-KVYFPRNTTME   | ...TPS.D..L.AH.GL  | 192 |
| AA476430  | 138 | ...      | E..QN   | SIMHRKF          | SAP...VYFPRNTTME   | R.TPS.D..HAAR.GL   | 191 |
| AA41983   | 116 | ...      | E...N   | SIMYRKF          | XAPC-KVYFPRNTTME   | ...TPS.D..L.AH.GL  | 168 |
| AA42008   | 71  | ...      | E...N   | SIMYRKF          | SAPC-KVYFPRNTTME   | ...TPS.D..L.AH.GL  | 123 |
| AA488345  | 136 | ...      | E...N   | SIMHRKF          | SAH..F.VYFPRNVT.E  | R.TPS.D..L.AH.GP   | 188 |
| AAQ97259  | 89  | ...      | X...N   | RTMHRRF          | SAPC-VYFPRNTTME    | H...SS.D..HSTR.GL  | 141 |
| AA41965   | 140 | ...      | E...N   | SIMYRKF          | SAPC-KVYFPRNTTME   | ...XTPS.D..L.AH.GL | 192 |
| AAQ63065  | 118 | V..      | E...N   | SIMHRKF          | SAH...VYFPRNVT.E   | H.TPS.N..F.AHWGL   | 170 |
| AAP76399  | 128 | ...      | E...N   | LMHRKF           | SAHC-VYFPRNVT.E    | H.TPS.DV.L.AH.GL   | 180 |
| AAP76401  | 137 | ...      | E...D   | SIMHRKF          | SSH...VYFPRKVT.E   | H.TPS.D..F.AH.GL   | 189 |
| AAP12372  | 7   | ...      | E...N   | SFMHRKF          | SAPC-VYSPRNATME    | H.TPS.D..AARQGL    | 59  |
| AA42035   | 139 | ...      | E...N   | SIMYRKF          | SAPC-KVYFPRNTTME   | ...TPS.D..L.AH.GL  | 191 |
| AAP76439  | 1   | ...      | E..QN   | SIMHRKF          | SAP-H.VYFORKET.E   | H.TPS.D..H.AH.GL   | 51  |
| AAP76402  | 133 | ...      | E...N   | AIMYRKF          | SAPC-VYFPRNTTME    | H.TAS.D..LPNHQ.L   | 185 |
| AA42030   | 132 | ...      | E...N   | SIMXRF           | SAPC-KVYFPRNTTME   | ...TPS.D..L.AH.GL  | 184 |
| AAP12377  | 12  | ...      | E...N   | SFMHRKF          | SAPC-VYSPRSETME    | H.TPS.D..HAAR.GL   | 64  |
| AA41979   | 141 | ...      | E...N   | SIMYRKF          | SAPC-KVYFPRNATME   | ...TPS.D..L.AH.GL  | 193 |
| AA41978   | 141 | ...      | E...N   | SIMYRKF          | SAPC-KVYFPRNATME   | ...TPS.D..L.AH.GL  | 193 |
| AAQ63071  | 88  | ...      | E...S   | IIMY.KF          | SAHC-VYFPRNAT.E    | H.XTS.D..L.AROGL   | 140 |
| AA488336  | 131 | ...      | E..RN   | SIMHRKF          | SAH...VYFPRNVT.E   | H.TPS.D..F.AH.GL   | 183 |
| ABI74711  | 151 | ...      | Q...I   | IIMYGRF          | NSP-Y.VYFPRNTATIE  | H.TQS.D..QAAR.GL   | 203 |
| AAP12379  | 12  | ...      | E...N   | NIMHRKF          | SAPC-VYFPRNTTME    | H.TPS.D..H---KGL   | 61  |
| AAP76400  | 135 | ...      | E...N   | SIMHRKF          | SAH..F.VYFPRNTATXE | H.TPS.D..LNAH.GL   | 187 |
| AAP12374  | 9   | ...      | E...N   | SFMHRKF          | SAPC-VYSPRNATME    | SS.TPS.D..H.AH.GL  | 61  |
| AAQ63060  | 136 | ...      | E...N   | SIMHRKFGSAH      | ...VYCPNVT.E       | X.TP..D..F.AH.GL   | 188 |
| AA488322  | 132 | ...      | E...N   | SIMHRKF          | SAH...VYCPNVT.E    | H.TPS.D..F.AH.GL   | 184 |
| ABS32176  | 131 | ...      | Q...S   | NIMYGRF          | NAPC-IHFPRKAAIE    | R.TPD.DS.QAAR.GL   | 183 |
| AAP76428  | 84  | ...      | E..QN   | SIMHRKF          | GAP-R.VYFPRNATME   | R.TPS.D..HAAR.GL   | 137 |
| AA41964   | 140 | ...      | E...N   | SIMYRKF          | SDPC-KVYFPRNATME   | ...TXS.D..L.AHXGL  | 192 |
| AA488320  | 136 | ...      | IE..N   | SIMHRKFGSAH      | ...VYCPNVT.E       | H.TPS.D..F.AH.GL   | 188 |
| AA488331  | 133 | V..      | E...N   | SIMYRKF          | SAH...VYFPRNVT.E   | H.TPS.N..F.AHPVL   | 185 |
| ABI74728  | 151 | ...      | Q...N   | NIMYGRF          | NSP-Y.VYFPRNATIE   | H.TPS.D..QAA       | 198 |
| AAQ97260  | 89  | ...      | E...N   | RIMHRRF          | SAPC-VYFPRNTTME    | H...PS.D..H5       | 135 |
| AA488325  | 136 | ...      | E...N   | SIMHRKF          | SAH...VYCPRNMT.E   | H.TPS.D..FAVH.GL   | 188 |
| AA488321  | 133 | ...      | E...N   | GIMHRKF          | SAH...VYCPRNVTXE   | H.TPS.D..F.AHQGL   | 185 |
| AA488333  | 135 | ...      | E...N   | SIMHRKF          | GAH...VYFPRNVT.E   | Q.TXS.D..FAAH.GL   | 187 |
| XP 540538 | 170 | V...N..K | K.MYRRF | SAPRG-VCFPRKAAPE | ...APS.DL.RAARQGL  | 222                |     |
| ABB48287  | 139 | V...N..K | K.MYRRF | SAPRG-VCFPRKAAPE | ...APS.DL.RAARQGL  | 191                |     |
| AAP12384  | 12  | ...      | E...S   | SIMHRKL          | RAP-H.VYFPR.AATE   | H.TPS.N..H.TP.GL   | 64  |
| AA488337  | 131 | ...      | E..G    | SIMHRKF          | SAHG-VYLPRTVTAE    | H.TPS.D..FAAH.GL   | 183 |
| AAP12373  | 12  | ...      | E...N   | IFMHRRF          | SAPC-VYSPRNATME    | SS.TTP.D..HIAH.GL  | 64  |
| 2111205A  | 99  | ...      | E...N   | SIMHRKFGSAH      | ...VYCPNVT.E       | H.TPS.D..F.AH.GL   | 151 |
| ABB48285  | 139 | V...N..K | K.MYRRF | SAPRG-VCFPRKAAPE | ...APS.DL.RAARQGL  | 191                |     |
| ABB48281  | 139 | V...N..K | K.MYRRF | SAPRG-VCFPRKAAPE | ...APS.DL.RAARQGL  | 191                |     |
| ABB48283  | 139 | V...N..K | K.MYRRF | SAPRG-VCFPRKAAPE | ...APS.DL.RAARQGL  | 191                |     |
| ABB48297  | 139 | V...N..K | K.MYRRF | SAPRG-VCFPRKAAPE | ...APS.DL.RAARQGL  | 191                |     |
| ABB48291  | 139 | V...N..K | K.MYRRF | SAPRG-VCFPRKAAPE | ...APS.DL.RAARQGL  | 191                |     |
| ABB48299  | 139 | V...N..K | K.MYRRF | SAPRG-VCFPRKAAPE | ...APS.DL.RAARQGL  | 191                |     |
| ABB48286  | 139 | V...N..K | K.MYRRF | SAPRG-VCFPRKAAPE | ...APS.DL.RAARQGL  | 191                |     |
| ABB48289  | 139 | V...N..K | K.MYRRF | SAPRG-VCFPRKAAPE | ...APS.DL.RAARQGL  | 191                |     |
| ABB48304  | 139 | V...D..K | K.MYRRF | SAPRG-VCFPRKAAPE | ...APS.DL.RAARQGL  | 191                |     |
| ABB48295  | 139 | V...N..K | K.MYRRF | SAPRG-VCFPRKAAPE | ...APS.DL.RAARQGL  | 191                |     |
| ABB48309  | 139 | V...D..K | K.MYRRF | SAPRG-VCFPRKAAPE | ...TPS.DL.RAARQGL  | 191                |     |
| AAP12376  | 1   | ...      | ..N     | SFMHRKF          | STPC-VYSPRNATME    | H.T.N.D..HIAH.GL   | 48  |
| ABB48292  | 139 | V...D..K | K.MYRRF | SAPRG-VCFPRKAAPE | ...APS.DL.RAARQGL  | 191                |     |

|          |     |      |        |          |                |            |            |      |     |          |         |    |    |     |
|----------|-----|------|--------|----------|----------------|------------|------------|------|-----|----------|---------|----|----|-----|
| AAQ57533 | 1   | ...  | I.     | RIMHRKF  | SAP-H          | VYFPRNAT   | E          | H    | TPS | D        | H       | AH | L  | 48  |
| ABB48293 | 139 | V... | D...K. | K        | MYRRF          | SAPRG-V    | CFPRKAAPE  | ...  | APS | DL       | RAARQGL |    |    | 191 |
| ABB48308 | 139 | V... | D...K. | K        | MYRRF          | SAPRG-V    | CFPRKAAPE  | ...  | APS | DL       | RAARQGL |    |    | 191 |
| ABB48296 | 139 | V... | N...K. | K        | MYRRF          | SAPRG-V    | CFPRKAAPE  | ...  | APS | DL       | RAARQGL |    |    | 191 |
| ABB48301 | 139 | V... | D...K. | K        | MYRRF          | STPRG-V    | CFPRKAAPE  | ...  | TPS | DL       | RAARQGL |    |    | 191 |
| ABB48305 | 139 | V... | D...K. | K        | MYRRF          | SAPRG-V    | CFPRKAAPE  | ...  | APS | DL       | RAARQGL |    |    | 191 |
| ABB48280 | 139 | V... | D...K. | K        | MYRRF          | SAPRG-V    | CFPRKAAPE  | ...  | APS | DL       | RAARQGL |    |    | 191 |
| ABB48303 | 139 | V... | D...K. | K        | MYRRF          | SAPRG-V    | CFPRKAAPE  | ...  | APS | DL       | RAARQGL |    |    | 191 |
| AAQ57531 | 1   | N.   | S.     | MHRKF    | SAPC-          | AYFPRNATME | H          | TPS  | D   | H        | PR      | GL |    | 45  |
| ABB48306 | 139 | V... | D...K. | K        | MYRRF          | SAPRG-V    | CFPRKAAPE  | ...  | APS | DL       | CAARQGL |    |    | 191 |
| ABB48307 | 139 | V... | D...K. | K        | MYRRY          | SAPRG-V    | CFPRKAAPE  | ...  | TPS | DL       | RAARQGL |    |    | 191 |
| ABW06513 | 1   | N.   | S.     | FMRHKKF  | STPC-          | IYSPRNATME | H          | TPN  | D   | Y        | AH      | GL |    | 46  |
| ABW06512 | 1   | N.   | S.     | MHRKF    | STPC-          | IYSPRNATME | H          | T    | N   | D        | H       | AR | GL | 46  |
| ABW06502 | 1   | N.   | S.     | FMRHKKF  | SAPC-          | IYSPRNATME | H          | TPS  | D   | Y        | AH      | GL |    | 46  |
| AAQ57532 | 2   | N.   | S.     | MHRKF    | SAPC-          | IYSPRNATME | H          | TPS  | D   | H        | TR      | GL |    | 45  |
| AAQ57535 | 1   | ...  | N.     | S.       | ILHRKFRS       | PC-        | IYSPRNATME | H    | TPS | D        | HSARQGL |    |    | 48  |
| AAF12386 | 1   | N.   | S.     | MHRKF    | SAP-           | IYSPRNATME | H          | TPS  | D   | HAARQGL  |         |    |    | 44  |
| AAQ57536 | 1   | ...  | N.     | S.       | IMHRKFRS       | PC-        | IYSPRNATME | H    | TPS | DX       | HAR     | L  |    | 48  |
| AAF12388 | 1   | N.   | S.     | MHRKF    | CAP-           | IYSPRNATME | H          | TPS  | D   | HAVR     | GL      |    |    | 44  |
| AAQ57534 | 1   | N.   | S.     | MHRKF    | SAPC-          | IYSPRNATME | H          | TSS  | D   | HASS     | GL      |    |    | 44  |
| AAF12383 | 2   | N.   | S.     | MHRKF    | SAPC-          | IYSPRNATME | H          | TPS  | D   | HAAR     | GL      |    |    | 45  |
| AAQ57548 | 1   | N.   | S.     | MHRKF    | SAP-           | IYSPRNATME | H          | TPS  | D   | H        | AHXGL   |    |    | 44  |
| ABW06501 | 1   | N.   | S.     | FMRHKKF  | SAPC-          | IYSPRNATME | H          | TPS  | D   | AAH      | GL      |    |    | 45  |
| ABW06503 | 1   | N.   | S.     | FMRHKKF  | SAPC-          | IYSPRNATME | H          | TSS  | D   | AAH      | GL      |    |    | 44  |
| AAQ57541 | 1   | N.   | S.     | IMHRKF   | GAP-R          | IYSPRNATME | R          | TPS  | D   | QMAH     | GL      |    |    | 45  |
| ABW06514 | 1   | N.   | S.     | FMRHKKF  | SAPC-          | IYSPRNATME | H          | TPS  | D   | HAAR     | GL      |    |    | 45  |
| AAQ57537 | 1   | N.   | S.     | MHRKFRS  | PC-            | IYSPRNATME | H          | TPS  | D   | HNAR     | GL      |    |    | 44  |
| ABW06505 | 1   | N.   | S.     | LMHRKF   | SAPC-          | IYSPRNATME | H          | TPS  | D   | AAH      | GL      |    |    | 44  |
| ABW06506 | 1   | S.   | S.     | FMRHKKF  | STPC-          | IYSPRNATME | H          | TPS  | D   | H        | AH      | GL |    | 46  |
| AAQ57538 | 1   | N.   | S.     | IMHRKF   | SAPC-          | IYSPRNATME | H          | TPS  | D   | H        | AH      | GL |    | 44  |
| AAF12387 | 1   | N.   | S.     | IMHRKF   | CAP-           | IYSPRNATME | H          | IPS  | D   | QAVR     | GL      |    |    | 44  |
| AAQ57545 | 1   | N.   | S.     | IMHRKF   | HVPC-          | IYSPRNATME | H          | TPS  | D   | HAAR     | GL      |    |    | 45  |
| AAQ57542 | 1   | N.   | S.     | IMHRKF   | GAP-R          | IYSPRNATME | H          | TPS  | D   | QVARQGL  |         |    |    | 44  |
| AAF12382 | 1   | N.   | S.     | IMHRKF   | SAPC-          | IYSPRNATME | H          | TPS  | D   | RAARQGL  |         |    |    | 44  |
| AAF12389 | 1   | N.   | S.     | IMHRKF   | HAP-           | IYSPRNATME | HA         | TPS  | D   | HAAR     | GL      |    |    | 43  |
| ABW06508 | 1   | N.   | S.     | FMRHRRF  | SAPC-          | IYSPRNATME | SS         | TPP  | D   | H        | ARQGL   |    |    | 46  |
| AAQ57549 | 1   | N.   | S.     | IMHRKF   | GTCP-          | IYSPRNATME | H          | TPS  | D   | H        | VH      | GL |    | 41  |
| AAF12371 | 2   | N.   | S.     | FMRHKKF  | SAPC-          | IYSPRNATME | H          | TPS  | D   | AAH      | GL      |    |    | 45  |
| ABW06511 | 1   | N.   | S.     | FMRHKKF  | SAPC-          | IYSPRNATME | SS         | TPS  | D   | H        | ARQGL   |    |    | 46  |
| ABW06504 | 1   | N.   | S.     | FMRHRRF  | SALC-          | IYSPRNATME | H          | TPP  | D   | AAH      | GL      |    |    | 44  |
| ABW06507 | 1   | N.   | S.     | FMRHRRF  | SAPC-          | IYSPRNATME | SS         | TPP  | D   | H        | ARQGL   |    |    | 46  |
| AAQ57530 | 1   | N.   | S.     | IMHRKL   | SAP-H          | IYSPRNATME | H          | TPS  | NV  | X        | TL      | GL |    | 44  |
| AAQ57544 | 2   | N.   | S.     | MHRKF    | SAP-R          | IYSPRNATME | Q          | AAAS | D   | Y        | AH      | RL |    | 45  |
| ABW06509 | 1   | N.   | S.     | FMRHRRF  | SAPC-          | IYSPRNATME | SS         | TPP  | D   | H        | AR      | GL |    | 45  |
| AAQ57547 | 2   | N.   | S.     | IMY      | KVGRAPC-       | IYSPRNATME | H          | TPS  | DV  | QAAR     | GL      |    |    | 45  |
| AAQ57540 | 1   | N.   | S.     | GIMHRKLG | SAPGG-AYFPRHAT | E          | S          | TPS  | D   | HPAH     | GL      |    |    | 44  |
| ABW06510 | 1   | N.   | S.     | FMRHKKF  | SAPC-          | IYSPRNATME | SS         | TPS  | GV  | H        | ARQGL   |    |    | 43  |
| AAQ57546 | 1   | N.   | S.     | RLMYRKL  | HGPC-DVTF      | SRHATME    | H          | TPA  | D   | QAARL    | GL      |    |    | 45  |
| AAQ57539 | 1   | N.   | S.     | RRF      | SAP-           | IYSPRNATME | H          | TAS  | D   | QSAARQGL |         |    |    | 38  |
| AAF12375 | 1   | N.   | S.     | PC-      | IYSPRNATME     | H          | TPS        | D    | H   | AR       | GL      |    |    | 32  |

Database: All non-redundant GenBank CDS translations+PDB+SwissProt+PIR+PRF excluded environmental samples from WGS projects

Posted date: Jan 24, 2008 5:51 PM

Number of letters in database: 2,024,981,677

Number of sequences in database: 5,872,341

Lambda K H  
0.328 0.139 0.522

Gapped  
Lambda K H  
0.267 0.0594 0.140

Matrix: BLOSUM62

Gap Penalties: Existence: 11, Extension: 1

Number of Sequences: 5872341

Number of Hits to DB: 31550355

Number of extensions: 1618417

Number of successful extensions: 3976

Number of sequences better than 100: 3

Number of HSP's better than 100 without gapping: 0

Number of HSP's gapped: 3975

Number of HSP's successfully gapped: 3

Length of query: 55

Length of database: 2024981677

Length adjustment: 28

Effective length of query: 27

Effective length of database: 1860556129

Effective search space: 50235015483

Effective search space used: 50235015483

T: 11

A: 40

X1: 15 (7.1 bits)

X2: 38 (14.6 bits)

X3: 64 (24.7 bits)

S1: 40 (19.5 bits)

S2: 65 (29.1 bits)

## REPTILES 1 Alignments

|          |     |             |        |       |        |        |          |        |       |        |        |          |     |
|----------|-----|-------------|--------|-------|--------|--------|----------|--------|-------|--------|--------|----------|-----|
| Query    | 1   | VIHPTHFCHTC | WTVIRK | WISDP | NSOEM  | GVLADR | VVGV     | WLP    | PHSLF | CKICD  | TGNRAV | K        | 55  |
| AAW21733 | 125 | T....R...N  | .SI    | .HRKF | .NAPC- | .VYF   | PRNSTME  | .K...  | .PN   | .TV    | .Y     | .ARSG..  | 178 |
| AAW21734 | 125 | T....R...N  | .SI    | .HRKF | .NAPC- | .VYF   | PRNSTME  | .KS... | .SN   | .TV    | .Y     | .AR.G..  | 178 |
| AAW21737 | 125 | T....R...N  | .SI    | .HRKF | .NAPC- | .VYF   | PRNSTME  | .KS... | .PN   | .TV    | .Y     | .AR.G..  | 178 |
| AAW21735 | 125 | T....R...N  | .SI    | .HRKF | .NAPC- | .VYF   | PRNSTME  | .KS... | .PD   | .TV    | .Y     | .AR.G..  | 178 |
| AAW21739 | 125 | T....R...N  | .SI    | .HRKF | .NAPC- | .VYF   | PRNSTMD  | .KS... | .PN   | .TV    | .Y     | .AR.G..  | 178 |
| AAW21745 | 125 | T....R...N  | .SI    | .HRKF | .NAPC- | .VYF   | PRNSTME  | .QS... | .S    | .TV    | .Y     | .AH.G..  | 178 |
| AAW21736 | 125 | T....R...N  | .SI    | .HRKF | .NTPC- | .VYF   | PRNSTIME | .KS... | .PN   | .TV    | .Y     | .AR.G..  | 178 |
| AAW21742 | 122 | T....R...N  | .SI    | .HRKF | .NAPC- | .VYF   | PRNSTMD  | .KS... | .PN   | .TV    | .Y     | .AR.G..  | 175 |
| AAW21741 | 122 | T....R...N  | .SI    | .HRKF | .NAPC- | .VYF   | PRNSTMD  | .KS... | .PN   | .TV    | .Y     | .AR.G..  | 175 |
| AAW21743 | 125 | T....R...N  | .SI    | .HRKF | .NAPC- | .VYF   | PRNSTMD  | .KS... | .PN   | .TV    | .Y     | .AR.G..  | 178 |
| AAW21746 | 125 | T....R...N  | .SI    | .HRKF | .NAPC- | .VYF   | PRNSTME  | .QS... | .PS   | .TV    | .C     | .AH.G..  | 178 |
| AAW21744 | 125 | T....R...N  | .SI    | .HRKF | .NAPC- | .VYF   | PRNSTME  | .QS... | .PS   | .TV    | .Y     | .IAH.G.. | 178 |
| AAW21747 | 125 | T....R...N  | .SI    | .HRKF | .NAPC- | .VYF   | PRNSTME  | .QS... | .PS   | .TV    | .C     | .AH.G..  | 178 |
| AAW21728 | 125 | T....R...N  | .SI    | .HRKF | .NAPC- | .VYF   | PRNSTME  | .KS... | .PN   | .TV    | .R     | .APHG..  | 178 |
| AAW21729 | 125 | T....R...N  | .SI    | .HRKF | .NTPC- | .VYF   | PRNSTME  | .KS... | .PN   | .TV    | .C     | .AP.G..  | 178 |
| AAW21748 | 125 | T....R...N  | .SI    | .HRKF | .NAPC- | .VYF   | PRNSTME  | .QS... | .PS   | .TV... | .AQ    | .GI..    | 178 |
| AAV97817 | 125 | T....R...N  | .SI    | .HRKF | .NAPC- | .VYF   | PRNSTME  | .KS... | .PN   | .TV    | .C     | .ARCG..  | 178 |
| AAW21730 | 125 | T....R...N  | .SI    | .HRKF | .NTPC- | .VYF   | PRNSTME  | .KS... | .SN   | .TV    | .C     | .AP.G..  | 178 |
| AAW21740 | 125 | T....R...N  | .SI    | .HRKF | .NAPC- | .VYF   | PRNSTMD  | .KS... | .PN   | .TV    | .Y     | .ARCG..  | 178 |
| AAW21738 | 125 | T....R...N  | .SI    | .HRKF | .NGPC- | .VYF   | PRNSTMD  | .KS... | .PD   | .TV    | .Y     | .AR.G..  | 178 |
| AAW21731 | 125 | T....R...N  | .SI    | .HRKF | .NTPC- | .VYF   | ARNNAME  | .K...  | .PN   | .TV    | .C     | .AHHG..  | 178 |
| AAW21732 | 125 | T....R..YN  | .SI    | .QRKF | .NAPC- | .VYF   | PRNSTMD  | .KS... | .PN   | .TV    | .Y     | .AR.G..  | 178 |
| AAW21749 | 125 | T....R...N  | .SI    | .HRKF | .TAPC- | .VYF   | PRNSTME  | .QS... | .PS   | .TV... | .AH    | .GI..    | 178 |
| AAW21750 | 126 | T....R...N  | .SI    | .HRKF | .NAPC- | .VYF   | PRNNTME  | .ES... | .PN   | .TV    | .F     | .AQ.GI.. | 178 |
| ABF81767 | 78  | T....R...N  | .SI    | .HRKF | .NAPC- | .VYF   | PRNSTME  | .KS... | .PN   | .TV    | .R     | .APHG..  | 131 |
| ABF81772 | 78  | T....R...N  | .SI    | .HRKF | .NAPC- | .VYF   | PRNSTME  | .KS... | .PN   | .TV    | .R     | .APHG..  | 131 |
| ABF81773 | 78  | T....R...N  | .SI    | .HRKF | .NAPC- | .VYF   | PRNSTME  | .KS... | .PN   | .TV    | .R     | .APHG..  | 131 |
| ABF81766 | 78  | T....R...N  | .SI    | .HRKF | .NAP-R | .VYF   | PRNSTME  | .KS... | .PN   | .TV    | .R     | .APHG..  | 131 |
| ABF81732 | 78  | T....R...N  | .SI    | .HRKF | .NAPC- | .VYF   | PRNSTME  | .KS... | .PN   | .TV    | .R     | .APHG..  | 131 |
| ABF81746 | 78  | T....R...N  | .SI    | .HRKF | .NAPC- | .VYF   | PRNSTME  | .KS... | .PN   | .TV    | .R     | .APHG..  | 131 |
| ABF81744 | 78  | T....R...N  | .SI    | .HRKF | .NAPC- | .VYF   | PRNSTME  | .KS... | .PN   | .TV    | .R     | .APHG..  | 131 |
| ABF81757 | 78  | T....R...N  | .SI    | .HRKF | .NAPC- | .VYF   | PRNSTME  | .KS... | .PN   | .TV    | .R     | .APHG..  | 131 |
| ABF81737 | 78  | T....R...N  | .SI    | .HRKF | .NAPC- | .VYF   | PRNSTME  | .KS... | .PN   | .TV    | .R     | .APHG..  | 131 |
| ABF81736 | 78  | T....R...N  | .SI    | .HRKF | .NAPC- | .VYF   | PRNSTME  | .KS... | .PN   | .TV    | .R     | .APHG..  | 131 |
| ABF81758 | 78  | T....R...N  | .SI    | .HRKF | .NAPC- | .VYF   | PRNSTME  | .KS... | .PN   | .TV    | .R     | .APHG..  | 131 |
| ABF81764 | 78  | T....R...N  | .SI    | .HRKF | .NAPC- | .VYF   | PRNSTME  | .KS... | .PN   | .TV    | .R     | .APHG..  | 131 |
| ABF81768 | 78  | T....R...N  | .SI    | .HRKF | .NAPC- | .VYF   | PRNSTME  | .KS... | .PN   | .TV    | .S     | .APHG..  | 131 |
| ABF81771 | 78  | T....R...N  | .SI    | .HRKF | .NAPC- | .VYF   | PRNSTME  | .KS... | .PN   | .TV    | .R     | .APHG..  | 131 |
| ABF81770 | 78  | T....R...N  | .SI    | .HRKF | .NAPC- | .VYF   | PRNSTME  | .KS... | .PN   | .TV    | .R     | .APHG..  | 131 |
| ABF81753 | 76  | T....R...N  | .SI    | .HRKF | .NAPC- | .VYF   | PRNSTME  | .KS... | .PN   | .TV    | .R     | .APHG..  | 129 |
| ABF81763 | 78  | T....R...N  | .SI    | .HRKF | .NAPC- | .VYF   | PRNSTME  | .KS... | .PN   | .TV    | .R     | .APHG..  | 130 |
| ABF81762 | 78  | T....R...N  | .SI    | .HRKF | .NAPC- | .VYF   | PRNSTME  | .K.R   | .PN   | .TV    | .R     | .APHG..  | 130 |

Database: All non-redundant GenBank CDS translations+PDB+SwissProt+PIR+PRF excluded environmental samples from WGS projects

Posted date: Jan 24, 2008 5:51 PM

Number of letters in database: 2,024,981,677

Number of sequences in database: 5,872,341

| Lambda | K     | H     |
|--------|-------|-------|
| 0.328  | 0.139 | 0.522 |

| Gapped<br>Lambda | K      | H     |
|------------------|--------|-------|
| 0.267            | 0.0594 | 0.140 |

Matrix: BLOSUM62

Gap Penalties: Existence: 11, Extension: 1

Number of Sequences: 5872341

Number of Hits to DB: 31550355

Number of extensions: 1618417

Number of successful extensions: 3976

Number of sequences better than 100: 3

Number of HSP's better than 100 without gapping: 0

Number of HSP's gapped: 3975

Number of HSP's successfully gapped: 3

Length of query: 55

Length of database: 2024981677

Length adjustment: 28

Effective length of query: 27

Effective length of database: 1860556129

Effective search space: 50235015483

Effective search space used: 50235015483

T: 11

A: 40

X1: 15 (7.1 bits)

X2: 38 (14.6 bits)

X3: 64 (24.7 bits)

S1: 40 (19.5 bits)

S2: 65 (29.1 bits)

---

**REPTILES 2 Alignments**

---

Query 1 VIHPTHFCHTCWTVIRKWI~~SD~~PNSQEM~~GV~~LADRVV~~GW~~LPHSLFCKICDTGNRAVK 55  
AAV90754 140 T.....N..SI.HRKF.NAPC-.VVFPRNSTMK.Q....N.EV.G.AH.G.. 193

Database: All non-redundant GenBank CDS translations+PDB+SwissProt+PIR+PRF excluding environmental samples from WGS projects

Posted date: Jan 24, 2008 5:51 PM

Number of letters in database: 2,024,981,677

Number of sequences in database: 5,872,341

Lambda K H  
0.328 0.139 0.522

Gapped

Lambda K H  
0.267 0.0594 0.140

Matrix: BLOSUM62

Gap Penalties: Existence: 11, Extension: 1

Number of Sequences: 5872341

Number of Hits to DB: 31550355

Number of extensions: 1618417

Number of successful extensions: 3976

Number of sequences better than 100: 3

Number of HSP's better than 100 without gapping: 0

Number of HSP's gapped: 3975

Number of HSP's successfully gapped: 3

Length of query: 55

Length of database: 2024981677

Length adjustment: 28

Effective length of query: 27

Effective length of database: 1860556129

Effective search space: 50235015483

Effective search space used: 50235015483

T: 11

A: 40

X1: 15 (7.1 bits)

X2: 38 (14.6 bits)

X3: 64 (24.7 bits)

S1: 40 (19.5 bits)

S2: 65 (29.1 bits)

# TURTLES Alignments

|          |     |              |                            |                     |     |
|----------|-----|--------------|----------------------------|---------------------|-----|
| Query    | 1   | VIHPTHFCHTC  | WTVIRKWISDPNSOEMGVLADRVVG  | WLPHSLFKICKDTGNRAVK | 55  |
| AAW21733 | 125 | T....R...N.. | .SI.HRKF.NAPC-.VYFPRNSTME. | .K...PN.TV.Y.ARSG.. | 178 |
| AAW21734 | 125 | T....R...N.. | .SI.HRKF.NAPC-.VYFPRNSTME. | .KS..SN.TV.Y.AR.G.. | 178 |
| AAW21737 | 125 | T....R...N.. | .SI.HRKF.NAPC-.VYFPRNSTME. | .KS..PN.TV.Y.AR.G.. | 178 |
| AAW21735 | 125 | T....R...N.. | .SI.HRKF.NAPC-.VYFPRNSTME. | .KS..PD.TV.Y.AR.G.. | 178 |
| AAW21739 | 125 | T....R...N.. | .SI.HRKF.NAPC-.VYFPRNSTMD. | .KS..PN.TV.Y.AR.G.. | 178 |
| AAW21745 | 125 | T....R...N.. | .SI.HRKF.NAPC-.VYFPRNSTME. | .QS...S.TV.Y.AH.G.. | 178 |
| AAW21736 | 125 | T....R...N.. | .SI.HRKF.NTPC-.VYFPRNSIME. | .KS..PN.TV.Y.AR.G.. | 178 |
| AAW21742 | 122 | T....R...N.. | .SI.HRKF.NAPC-.VYFPRNSTMD. | .KS..PN.TV.Y.AR.G.. | 175 |
| AAW21741 | 122 | T....R...N.. | .SI.HRKF.NAPC-.VYFPRNSTMD. | .KS..PN.TV.Y.AR.G.. | 175 |
| AAW21743 | 125 | T....R...N.. | .SI.HRKF.NAPC-.VYFPRNSTMD. | .KS..PN.TV.Y.AR.G.. | 178 |
| AAW21746 | 125 | T....R...N.. | .SI.HRKF.NAPC-.VYFPRNSTME. | .QS..PS.TV.C.AH.G.. | 178 |
| AAW21744 | 125 | T....R...N.. | .SI.HRKF.NAPC-.VYFPRNSTME. | .QS..PS.TV.YIAH.G.. | 178 |
| AAW21747 | 125 | T....R...N.. | .SI.HRKF.NAPC-.VYFPRNSTME. | .QS..PS.TV.C.AH.G.. | 178 |
| AAW21728 | 125 | T....R...N.. | .SI.HRKF.NAPC-.VYFPRNSTME. | .KS..PN.TV.R.APHG.. | 178 |
| AAW21729 | 125 | T....R...N.. | .SI.HRKF.NTPC-.VYFPRNSTME. | .KS..SN.TV.C.AP.G.. | 178 |
| AAW21748 | 125 | T....R...N.. | .SI.HRKF.NAPC-.VYFPRNSTME. | .QS..PS.TV...AQ.GI. | 178 |
| AAV97817 | 125 | T....R...N.. | .SI.HRKF.NAPC-.VYFPRNSTME. | .KS..PN.TV.C.ARCG.. | 178 |
| AAW21730 | 125 | T....R...N.. | .SI.HRKF.NTPC-.VYFPRNSTME. | .KS..SN.TV.C.AP.G.. | 178 |
| AAW21740 | 125 | T....R...N.. | .SI.HRKF.NAPC-.VYFPRNSTMD. | .KS..PN.TV.Y.ARCG.. | 178 |
| AAW21738 | 125 | T....R...N.. | .SI.HRKF.NGPC-.VYFPRNSTMD. | .KS..PD.TV.Y.AR.G.. | 178 |
| AAW21731 | 125 | T....R...N.. | .SI.HRKF.NTPC-.VYFARNNAME. | .K...PN.TV.C.AHHG.. | 178 |
| AAW21732 | 125 | T....R...YN. | .SI.ORKF.NAPC-.VYFPRNSTMD. | .KS..PN.TV.Y.AR.G.. | 178 |
| AAW21749 | 125 | T....R...N.. | .SI.HRKF.TAPC-.VYFPRNSTME. | .QS..PS.TV...AH.GI. | 178 |
| AAW21750 | 126 | ....R...N..  | .SI.HRKF.NAPC-.VYFPRNNTME. | .ES..PN.TV.F.AQ.GI. | 178 |
| ABF81767 | 78  | T....R...N.. | .SI.HRKF.NAPC-.VYFPRNSTME. | .KS..PN.TV.R.APHG.. | 131 |
| ABF81772 | 78  | T....R...N.. | .SI.HRKF.NAPC-.VYFPRNSTME. | .KS..PN.TV.R.APHG.. | 131 |
| ABF81773 | 78  | T....R...N.. | .SI.HRKF.NAPC-.VYFPRNSTME. | .KS..PN.TV.R.APHG.. | 131 |
| ABF81766 | 78  | T....R...N.. | .SI.HRKF.NAP-R.VYFPRNSTME. | .KS..PN.TV.R.APHG.. | 131 |
| ABF81732 | 78  | T....R...N.. | .SI.HRKF.NAPC-.VYFPRNSTME. | .KS..PN.TV.R.APHG.. | 131 |
| ABF81746 | 78  | T....R...N.. | .SI.HRKF.NAPC-.VYFPRNSTME. | .KS..PN.TV.R.APHG.. | 131 |
| ABF81744 | 78  | T....R...N.. | .SI.HRKF.NAPC-.VYFPRNSTME. | .KS..PN.TV.R.APHG.. | 131 |
| ABF81757 | 78  | T....R...N.. | .SI.HRKF.NAPC-.VYFPRNSTME. | .KS..PN.TV.R.APHG.. | 131 |
| ABF81737 | 78  | T....R...N.. | .SI.HRKF.NAPC-.VYFPRNSTME. | .KS..PN.TV.R.APHG.. | 131 |
| ABF81736 | 78  | T....R...N.. | .SI.HRKF.NAPC-.VYFPRNSTME. | .KS..PN.TV.R.APHG.. | 131 |
| ABF81758 | 78  | T....R...N.. | .SI.HRKF.NAPC-.VYFPRNSTME. | .KS..PN.TV.R.APHG.. | 131 |
| ABF81764 | 78  | T....R...N.. | .SI.HRKF.NAPC-.VYFPRNSTME. | .KS..PN.TV.R.APHG.. | 131 |
| ABF81768 | 78  | T....R...N.. | .SI.HRKF.NAPC-.VYFPRNSTME. | .KS..PN.TV.S.APHG.. | 131 |
| ABF81771 | 78  | T....R...N.. | .SI.HRKF.NAPC-.VYFPRNSTME. | .KS..PN.TV.R.APHG.. | 131 |
| ABF81770 | 78  | T....R...N.. | .SI.HRKF.NAPC-.VYFPRNSTME. | .KS..PN.TV.R.APHG.. | 131 |
| ABF81753 | 76  | T....R...N.. | .SI.HRKF.NAPC-.VYFPRNSTME. | .KS..PN.TV.R.APHG.. | 129 |



|                 |    |              |                          |                    |     |
|-----------------|----|--------------|--------------------------|--------------------|-----|
| <b>ABF81763</b> | 78 | T....R...N.. | SI.HRKF.NAPC-.VYFPRNSTME | .KS..PN.TV.R.APHG. | 130 |
| <b>ABF81762</b> | 78 | T....R...N.. | SI.HRKF.NAPC-.VYFPRNSTME | .K.R.PN.TV.R.APHG. | 130 |

Database: All non-redundant GenBank CDS translations+PDB+SwissProt+PIR+PRF exclu  
environmental samples from WGS projects

Posted date: Jan 24, 2008 5:51 PM

Number of letters in database: 2,024,981,677

Number of sequences in database: 5,872,341

|        |       |       |  |
|--------|-------|-------|--|
| Lambda | K     | H     |  |
| 0.328  | 0.139 | 0.522 |  |

Gapped

|        |        |       |  |
|--------|--------|-------|--|
| Lambda | K      | H     |  |
| 0.267  | 0.0594 | 0.140 |  |

Matrix: BLOSUM62

Gap Penalties: Existence: 11, Extension: 1

Number of Sequences: 5872341

Number of Hits to DB: 31550355

Number of extensions: 1618417

Number of successful extensions: 3976

Number of sequences better than 100: 3

Number of HSP's better than 100 without gapping: 0

Number of HSP's gapped: 3975

Number of HSP's successfully gapped: 3

Length of query: 55

Length of database: 2024981677

Length adjustment: 28

Effective length of query: 27

Effective length of database: 1860556129

Effective search space: 50235015483

Effective search space used: 50235015483

T: 11

A: 40

X1: 15 (7.1 bits)

X2: 38 (14.6 bits)

X3: 64 (24.7 bits)

S1: 40 (19.5 bits)

S2: 65 (29.1 bits)

# CROCODILIANS Alignments

|          |     |                                                                      |     |
|----------|-----|----------------------------------------------------------------------|-----|
| Query    | 1   | VIHPTHFCHTCWTVIRKWISDPNSQEMGVLADR <del>VVE</del> WLPHSLFCKICDTGNRAVK | 55  |
| AAD34951 | 140 | T...R...N...SI.QRKF.SSP-Y.VYFPRNSTME.Q...PN.DV.H.SC.GI.              | 193 |
| AAD34950 | 140 | T...R...N...SI.QRKF.SSP-Y.VYFPRNSAME.Q...PN.DV.H.SC.GI.              | 193 |
| ABY59708 | 1   | ...R...N...SI.QRKF.SSP-Y.VYFPRNSAME.Q...PN.DV.H.SCQGI.               | 52  |
| ABY59709 | 1   | ...R...N...SI.QRKF.SSP-Y.VYFPRNSAME.Q...PN.DV.H.SCQGI.               | 52  |
| ABY59705 | 1   | ...R...N...SI.QRKF.SSP-Y.VYFPRNSAME.Q...PN.DV.H.SCQGI.               | 52  |
| ABY59710 | 1   | ...R.QN...SI.QRKF.SSP-Y.VYFPRNSAME.Q...PN.DV.H.SCQGI.                | 52  |
| ABY59714 | 1   | ...R.QN...SI.QRKF.SSP-Y.VYFPRNSAME.Q...PN.DV.H.SCQGI.                | 52  |
| ABY59711 | 1   | ...R.QN...SI.QRKF.SSP-Y.VYFPRNSAME.Q...PN.DV.H.SCQGI.                | 52  |
| ABY59713 | 1   | ...R.QN...SI.QRKF.SSP-Y.VYFPRNSAME.Q...PN.DV.H.SCQGI.                | 52  |
| ABY59712 | 1   | ...R.QN...SI.QRKF.SSP-Y.VYFPRNSA.E.Q...PN.DV.H.SCQGI.                | 52  |
| AAP20631 | 1   | .QRKF.SSP-Y.VYFPRNSTME.Q...PN.DV.H.SC.GI.                            | 40  |
| AAP20626 | 1   | .QRKF.SSP-Y.VYFPRNSAME.Q...PN.DV.H.SC.GI.                            | 40  |
| AAP20623 | 1   | .QRKF.SSP-Y.VYFPRNSAME.Q...PN.DV.H.SCQGI.                            | 40  |
| AAP20625 | 1   | .QRKF.SSP-Y.VYFPRNSAME.Q...PN.DV.H.SCQGI.                            | 40  |
| AAP20624 | 1   | .QRKF.SSP-Y.VYFPRNSAME.Q...PN.DV.H.SCQGI.                            | 40  |
| AAP20621 | 1   | .QRKF.SSP-Y.VYFPRNSAME.Q...PN.DV.H.SCQGI.                            | 40  |
| AAP20629 | 1   | .QRKF.SSP-Y.VYFPRNSTME.Q...PN.DV.L.SC.GI.                            | 40  |
| AAP20627 | 1   | .QRKF.SSP-Y.VYFPRNSTME.Q...PN.DV.L.SC.GI.                            | 40  |
| AAP20630 | 1   | .QRKF.SSP-Y.VYFPRNSTME.Q...PN.DV.L.SC.GI.                            | 40  |
| AAP20628 | 1   | .QRKF.SSP-Y.VYFPRNSTME.Q...PN.DV.L.SC.GI.                            | 40  |
| AAN15778 | 1   | KF.SSP-Y.VYFPRNSTME.Q...PN.DV.H.SC.GI.                               | 37  |
| AAN15777 | 1   | KF.SSP-Y.VYFPRNSTME.Q...PN.DV.H.SC.GI.                               | 37  |
| AAN15769 | 1   | KF.SSP-Y.VYFPRNSAME.Q...PN.DV.H.SC.GI.                               | 37  |
| AAN15768 | 1   | KF.SSP-Y.VYFPRNSAME.Q...PN.DV.H.SC.GI.                               | 37  |
| AAN15766 | 1   | KF.SSP-Y.VYFPRNSAME.Q...PN.DV.H.SCQGI.                               | 37  |
| AAN15776 | 1   | KF.SSP-Y.VYFPRNSTME.Q...PN.DV.L.SC.GI.                               | 37  |
| AAN15767 | 1   | KF.SSP-Y.VYFPRNSAME.Q...PN.DV.H.SCQGI.                               | 37  |
| AAN15770 | 1   | KF.SSP-Y.VYFPRNSTME.Q...PN.DV.L.SC.GI.                               | 37  |
| AAN15773 | 1   | KF.SSP-Y.VYFPRNSTME.Q...PN.DV.L.SC.GI.                               | 37  |
| AAN15763 | 1   | KF.SSP-Y.VYFPRNSAME.Q...PN.DV.H.SCQGI.                               | 37  |
| AAN15771 | 1   | KF.SSP-Y.VYFPRNSTME.Q...PN.DV.L.SC.GI.                               | 37  |

Database: All non-redundant GenBank CDS translations+PDB+SwissProt+PIR+PRF excluding environmental samples from WGS projects

Posted date: Jan 24, 2008 5:51 PM

Number of letters in database: 2,024,981,677

Number of sequences in database: 5,872,341

Lambda K H  
0.328 0.139 0.522

Gapped  
Lambda K H  
0.267 0.0594 0.140

Matrix: BLOSUM62

Gap Penalties: Existence: 11, Extension: 1

Number of Sequences: 5872341

Number of Hits to DB: 31550355

Number of extensions: 1618417

Number of successful extensions: 3976

Number of sequences better than 100: 3

Number of HSP's better than 100 without gapping: 0

Number of HSP's gapped: 3975

Number of HSP's successfully gapped: 3

Length of query: 55

Length of database: 2024981677

Length adjustment: 28

Effective length of query: 27

Effective length of database: 1860556129

Effective search space: 50235015483

Effective search space used: 50235015483

T: 11

A: 40

X1: 15 (7.1 bits)

X2: 38 (14.6 bits)

X3: 64 (24.7 bits)

S1: 40 (19.5 bits)

S2: 65 (29.1 bits)

# AMPHIBIANS Alignments

|                 |     |                                                         |     |
|-----------------|-----|---------------------------------------------------------|-----|
| Query           | 1   | VIHPHFCHTCTWTVIRKWISDPNSQEMGVLADRVLGWLPHSLFCKICDTGNRAVK | 55  |
| <b>ABS32184</b> | 147 | T.....N..SI.HQKF.NAPC-.VYFPRNDT.E.Q...VT.SV.TSVR.G..    | 200 |
| <b>ABS32186</b> | 136 | T....R...N..SI.NQKFNNAPC-.VYFPRNDA.E.Q...VT.SV.TSFQ.GI. | 189 |
| <b>ABS32185</b> | 131 | T....R...N..SI.NQKFNNAPC-.VYFPRNDA.E.Q...VT.SV.TSVR.GI. | 184 |
| <b>ABS32183</b> | 131 | T.....N..SI.NQKF.NAPC-.VYFPRNGA.E.Q...V.SV.TSVR.GI.     | 184 |
| <b>CAC20851</b> | 204 | TV...S...N..AI.KORF.STPC-.VYFPRNGA.E.Q...AN.GV.RSAKHSL. | 257 |
| <b>ABS32182</b> | 140 | ....R...N..SIVHQKF.NSF-.VYFPRNKA.E.K..CST.DV.SSS        | 187 |
| <b>Q91829</b>   | 169 | T....Q...N..IMNQKF.NI-.S.VYFPHNQA.E.T...AN.YV.HSS       | 217 |
| <b>ABS00342</b> | 83  | T....R...N..IMNQKF.H-.S.VYFPHNQA.E.T...SA.NV.HSS        | 131 |
| <b>ABS00336</b> | 144 | T....R...N..IMN.KF.H-.S.VYFPHNQA.E.T...AA.NV.HSS        | 192 |
| <b>ABS32181</b> | 138 | TV...S...N..SI.KORF.NTPC-.VYFPRKGT.E.KS..AD.G..HXVK.G.. | 191 |
| <b>ABS00332</b> | 139 | T....R...N..LMNQKF.NNP-.VYFPHNQTA.E.K...AE.DV.RST       | 187 |
| <b>ABS00349</b> | 163 | T....R...N..IMNQKF.H-.S.VYFPHNQA.E.T...AA.NV.HSS        | 211 |
| <b>ABS00352</b> | 163 | T....R...N..IMNQKF.H-.S.VYFPHNQA.E.T...AA.NV.HSS        | 211 |
| <b>ABS00354</b> | 83  | T....R...N..IMNQKF.H-.S.VYFPHNQA.E.T...AA.NV.HSS        | 131 |
| <b>ABS00353</b> | 163 | T....R...N..IMNQKF.H-.S.VYFPHNQA.E.T...AA.NV.HSS        | 211 |
| <b>ABS00345</b> | 83  | T....R...N..IMNQKF.H-.S.VYFPHNQA.E.T...AA.NV.HSS        | 131 |
| <b>ABS00359</b> | 122 | T....R...N..IMNQKF.HNA-.VYFPHNQA.E.T...AA.NV.HSS        | 170 |
| <b>ABS00358</b> | 122 | T....R...N..IMNQKF.HNA-.VYFPHNQA.E.T...AA.NV.HSS        | 170 |
| <b>ABS00355</b> | 83  | T....R...N..IMNQKF.H-.S.VYFPHNQA.E.T...AA.NV.HSS        | 131 |
| <b>ABS00347</b> | 163 | T....R...N..IMNQKF.HNA-.VYFPHNQA.E.T...AA.NV.HSS        | 211 |
| <b>ABS00356</b> | 163 | T....R...N..IMNQKF.HNA-.VYFPHNQA.E.T...AA.NV.HSS        | 211 |
| <b>ABS00357</b> | 163 | T....R...N..IMNQKF.HNA-.VYFPHNQA.E.T...AA.NV.HSS        | 211 |
| <b>ABS00348</b> | 163 | T....R...N..IMNQKF.HNA-.VYFPHNQA.E.T...AA.NV.HSS        | 211 |
| <b>ABS00335</b> | 65  | T....R...N..LMNQKF.H-.S.VYFPHNQA.E.T...SA.NV.HSS        | 113 |
| <b>ABS00344</b> | 83  | T....R...N..IVNQKF.H-.S.VYFPHNQA.E.T...AA.NV.HSS        | 131 |
| <b>BAF99790</b> | 115 | T....R...N..IMHQKF.NT-.S.VYFPRNT.E.KS..SM.DV.NNSR       | 164 |
| <b>ABS00346</b> | 83  | T....Q...N..IMNQKF.HI-.S.VYFPHNQA.E.T...AA.YV.HSS       | 131 |
| <b>ABS00350</b> | 163 | T....R...N..IMNQKF.RNA-.VYFPHNQA.E.T...AA.NV.HSS        | 211 |
| <b>ABS00343</b> | 83  | T....R...N..LMNQKF.H-.S.VYFPHNQA.E.T...AA.NV.HSS        | 131 |
| <b>ABS00341</b> | 83  | T....R...N..LMNQKF.H-.S.VYFPHNQA.E.T...AA.NV.HSS        | 131 |
| <b>BAF99787</b> | 106 | T....R...N..IMHQKF.NT-.S.VYFPRNK.E.KS..ST.DV.NNS        | 154 |
| <b>BAF99781</b> | 132 | T....R...N..IMHQKF.NT-.N.VYFPRNK.E.KS..ST.DV.SNS        | 180 |
| <b>ABS00351</b> | 163 | T....R...N..IMNQKF.H-.S.VYFPHNQA.E.T...LAA.NV.HSS       | 211 |
| <b>BAF99783</b> | 99  | T....R...N..IMHQKF.NT-.S.VYFPRNK.E.KS..ST.DV.NNS        | 147 |
| <b>BAF99785</b> | 127 | T....R...N..IMHQKF.NT-.N.VYFPRNK.E.KS..ST.DV.XNS        | 175 |
| <b>BAF99779</b> | 116 | T....R...N..IMHQKF.NT-.N.VYFPRNK.E.KS..ST.DV.SNS        | 164 |
| <b>BAF99789</b> | 127 | T....R...N..IMHQKF.NT-.N.VYFPRNK.E.KS..ST.DV.SNS        | 175 |
| <b>BAF99791</b> | 127 | T....R...N..IMHQKF.NT-.S.VYFPRNK.E.K...ST.ET.NNS        | 175 |
| <b>BAF99782</b> | 114 | T....R...N..IMHQKF.NT-.S.VYFPRNK.E.KS..XT.DV.NNS        | 162 |
| <b>BAF99788</b> | 134 | T....X...N..IMHQKF.NT-.N.VYFPRNK.E.KS..ST.DV.SNS        | 182 |

|          |     |              |                           |                   |     |
|----------|-----|--------------|---------------------------|-------------------|-----|
| ABS00339 | 65  | T....R...N.. | ..LMNQRF.H-.S.VYFPHNOA.E  | T...AA.NV.HSS     | 113 |
| ABS00340 | 83  | T....G...N.. | ..IMNQKF.H-.S.VYFPHNOA.E  | T...AA.NV.XSS     | 131 |
| BAF99786 | 68  | T....R...N.. | ..IMHQKF.NS-.S.VYFPRNKA.E | KS..ST.D..NNS     | 116 |
| ABS00337 | 65  | T....Q...N.. | ..I.NQKF.HNA-.VYFPHNOA.E  | TH..DA.NV.HSS     | 113 |
| BAF99780 | 68  | T....R...N.. | ..IMHQKF.NT-.N.VYFPRNK..E | KS..ST.DV.SNS     | 116 |
| BAF99784 | 114 | T....R...N.. | ..IMHQKF.NT-.S.VYFPRNK..E | KS.XXT.DV.NNS     | 162 |
| ABS00331 | 134 | T..S....N..  | ..SIVNQKF.H-.S.VYFPHNKT.E | M...DA.NV.RST     | 182 |
| ABS00338 | 147 | ....R...N..  | ..IMNQKFRHI-.S.VYFPHNKA.E | TL..AS.YA.HSS     | 194 |
| BAF99792 | 130 | T....R...N.. | ..IMHQKFRNT-.S.VYFPHNK..E | XS.LTP.EV.NNS     | 178 |
| ABR18629 | 1   |              | HRKFNNSP-.VYFPRNNA.E      | K..CAT.DV.NSS     | 34  |
| ABR18628 | 1   |              | HRKFNNS-.S.VYFPRNNA.E     | K..CST.DV.NSSKRG. | 39  |
| ABR18623 | 1   |              | HRKFNNS-.S.VYFPRNNA.E     | K..CST.DV.NSS     | 34  |
| ABR18614 | 1   |              | HRKFNNS-.S.VYFPRNNA.E     | K..CST.DV.NSS     | 34  |
| ABR18631 | 1   |              | HRKFNNS-.S.VYFPRNNA.E     | K..CST.DV.NSS     | 34  |
| ABR18613 | 1   |              | HQKF.NT-.S.VYFPRNNA.E     | K..CVS.DV.NSS     | 34  |
| ABR18619 | 1   |              | HRKFNNS-.S.VYFPRNNA.E     | K..CST.DV.NSS     | 34  |
| ABR18617 | 1   |              | HQKF.NS-.S.VYFPRNNA.E     | K..CST.DV.NSS     | 34  |
| ABR18663 | 1   |              | HQKF.NS-.S.VYFPRNNA.E     | K..CST.DV.NSS.    | 35  |
| ABR18626 | 1   |              | HQKF.NS-.S.VYFPRNNA.E     | K..CST.DV.NSS     | 34  |
| ABR18643 | 1   |              | HQKF.NS-.S.VYFPRNNA.E     | K..CSK.DV.SSS     | 34  |
| ABR18648 | 1   |              | HQKF.NS-.S.VYFPRNNA.E     | K..CSK.DV.SSS.    | 35  |
| ABR18637 | 1   |              | HQKF.NS-.S.VYFPRNNA.E     | K..CSK.DV.SSS     | 34  |
| ABR18630 | 1   |              | HQKF.NNS-.S.VYFPRNNA.E    | R...ST.DV.SSS     | 34  |
| ABR18652 | 1   |              | HQKF.NS-.S.VYFPRNNA.E     | K..CSK.DV.SSS     | 34  |
| ABR18611 | 1   |              | HQKF.NNS-.S.VYFPRNNA.E    | K..CST.D..NNS     | 34  |
| ABR18610 | 1   |              | HQKF.NNS-.S.VYFPRNNA.E    | K..CST.DV.NSS     | 34  |
| ABR18638 | 1   |              | HQKF.NS-.S.VYFPRNNA.E     | K..CSK.DV.SSS     | 34  |
| ABR18659 | 1   |              | HQKF.NSF-.VYFPRNNA.E      | K..CST.DV.NSS     | 34  |
| ABR18658 | 1   |              | HQKF.NS-.S.VYFPRNNA.E     | K..CSK.DV.SSS     | 34  |
| ABR18621 | 1   |              | HRKFNNS-.S.VYFPRNNA.E     | K...YT.DV.NSS     | 34  |
| ABR18625 | 1   |              | HQKF.NNS-.S.VYFPRNNA.E    | K..CST.DV.SSS     | 34  |
| ABR18627 | 1   |              | HQKF.NNS-.S.VYFPRNNA.E    | K..CSK.DV.NSS     | 34  |
| ABR18608 | 1   |              | HQKF.NSF-.VYFPRNNA.E      | K..CSP.DV.NAS     | 34  |
| ABR18641 | 1   |              | HQKF.NNS-.S.VYFPRNNA.E    | K..CSK.DV.SSS     | 34  |
| ABR18649 | 1   |              | HQKF.NSF-.VYFPRNNA.E      | K..CSK.DV.SSS     | 34  |
| ABR18655 | 1   |              | HQKF.NNS-.S.VYFPRNNA.E    | K..CSK.DV.SSS     | 34  |
| ABR18667 | 1   |              | HQKF.HSF-.VYFPRNNA.E      | K..CST.DV.NSS     | 34  |
| ABR18616 | 1   |              | HQKF.NNS-.S.VYFPRNNAKE    | K..CST.D..NNS     | 34  |
| ABR18615 | 1   |              | HRKFNNS-.N.VYFPRNNA.D     | KA.CST.DV.NSS     | 34  |
| ABR18635 | 1   |              | HQKF.NNS-.S.VYFPRNNA.E    | KS.CSE.DV.NSS     | 34  |
| ABR18664 | 1   |              | F.NS-.S.VYFPRNNA.E        | K..CST.DV.NSS     | 31  |
| ABR18653 | 1   |              | HQKF.NS-.S.VYFPRNNA.E     | K..CSK.NV.        | 31  |
| ABR18651 | 1   |              | HHKF.NS-.S.VYFPRNNA.E     | KA.CSK.DV.SSS     | 34  |
| ABR18660 | 1   |              | HQKF.NNS-.S.VYFPRNNA.A    | KR.CSA.DV.NSS     | 34  |
| ABR18609 | 1   |              | .S.VYFPRNNA.E             | K..CST.DV.NSS     | 27  |
| ABR18622 | 2   |              | .S.VYFPRNNA.E             | K..CST.DV.NSS     | 28  |
| ABR18647 | 1   |              | NNS.S.VYFPRNNA.E          | K..CSK.DV.SSS     | 30  |
| ABR18612 | 3   |              | .S.VYFPRNNA.E             | K..CST.DV.NSS     | 29  |
| ABR18646 | 1   |              | .S.VYFPRNNA.E             | K..CSK.DV.SSS.    | 28  |
| ABR18650 | 2   |              | .S.VYFPRNNA.E             | K..CSK.DV.SSS     | 28  |
| ABR18656 | 2   |              | .S.VYFPRNNA.E             | K..CSK.DV.SSS     | 28  |
| ABR18618 | 1   |              | .VYFPRNNA.E               | T..CST.DV.NSS     | 25  |
| ABR18639 | 2   |              | .S.VYFPRNNA.D             | K..CSK.DV.SSS     | 28  |
| ABR18624 | 1   |              | S.VYFPRNNA.E              | K..CAT.DF.NSS     | 26  |
| ABR18645 | 1   |              | .VYFPRNNA.E               | KA.CSK.DV.SSS     | 25  |
| ABR18665 | 1   |              | S.VYFPRNNA.E              | KL.CST.DV.NLS     | 26  |

|                 |   |                         |    |
|-----------------|---|-------------------------|----|
| <b>ABR18666</b> | 1 | FPRNNA.E.K..CST.DV.NSS  | 22 |
| <b>ABR18634</b> | 1 | YFPRNDA.E.KR.CPT.DV.NSS | 23 |
| <b>ABR18636</b> | 1 | FPRNNA.A.K..CSA.DV.NSS  | 22 |
| <b>ABR18657</b> | 1 | NNA.E.K..CSK.DV.SSS     | 19 |
| <b>ABR18620</b> | 1 | NNA.E.K..CVP.DV.NSS     | 19 |

Database: All non-redundant GenBank CDS translations+PDB+SwissProt+PIR+PRF excluding environmental samples from WGS projects

Posted date: Jan 24, 2008 5:51 PM

Number of letters in database: 2,024,981,677

Number of sequences in database: 5,872,341

Lambda      K      H  
0.328      0.139      0.522

Gapped

Lambda      K      H  
0.267      0.0594      0.140

Matrix: BLOSUM62

Gap Penalties: Existence: 11, Extension: 1

Number of Sequences: 5872341

Number of Hits to DB: 31550355

Number of extensions: 1618417

Number of successful extensions: 3976

Number of sequences better than 100: 3

Number of HSP's better than 100 without gapping: 0

Number of HSP's gapped: 3975

Number of HSP's successfully gapped: 3

Length of query: 55

Length of database: 2024981677

Length adjustment: 28

Effective length of query: 27

Effective length of database: 1860556129

Effective search space: 50235015483

Effective search space used: 50235015483

T: 11

A: 40

X1: 15 (7.1 bits)

X2: 38 (14.6 bits)

X3: 64 (24.7 bits)

S1: 40 (19.5 bits)

S2: 65 (29.1 bits)

# LIZARDS Alignments

|          |     |                   |                  |                 |                   |     |
|----------|-----|-------------------|------------------|-----------------|-------------------|-----|
| Query    | 1   | VIHPTHFCHTCWTVIRK | WISDPNSOEMGVLADR | VVGWLP          | PHSLFCKICDTGNRAVK | 55  |
| AAV90760 | 140 | T....N...N..N..   | ORKF.NSP.-.      | VYFPRKGTME.H... | SS.DV.G.SF.G..    | 193 |
| AAV90759 | 140 | T....N...N..N..   | ORKF.NSP.-.      | VYFPRKGTME.H... | SS.DV.G.SFHGI..   | 193 |
| AAV90802 | 136 | T....N...N..S..   | ORKF.NAPC.-.     | VYFPRKGTME.H... | MS.D..G.SSHG..    | 189 |
| AAV90787 | 142 | T....N...N..N..   | VORKF.NSPC.-.    | VYFPRNGTME.H... | SS.DV.S.SFHG..    | 195 |
| AAV90765 | 140 | T....N...N..N..   | ORKF.NSP.-.      | VYFPRKGTME.H... | S.DV.G.SF.G..     | 193 |
| AAV90793 | 140 | T....N...N..N..   | VORKF.NSPCE.-.   | YFPRNGTME.H...  | SS.EV.G.SF.G..    | 193 |
| AAV90781 | 141 | T....N...N..N..   | VORKF.NSPC.-.    | VYFPRNGTME.H... | SS.DV.N.SF.G..    | 194 |
| AAV90758 | 140 | T....N...N..N..   | ORKF.NTP.-K      | VYFPRKGTME.H... | SS.DV.G.SF.GI..   | 193 |
| AAV90788 | 141 | T....N...N..N..   | VORKF.NSPC.-.    | VYLPRNGTME.H... | SS.DV.G.SF.G..    | 194 |
| AAV90796 | 140 | T....N...N..N..   | ORKF.NAP-YD      | VYFPRNGTME.H... | SS.EV.G.SFHG..    | 193 |
| AAV90783 | 141 | T....N...N..S..   | VORKF.NSPC.-.    | VYFPRNGTME.R... | S.DV.G.SF.G..     | 194 |
| AAV90761 | 140 | T....N...N..N..   | ORKF.NSL.-.      | VYFPRKGTME.H... | SS.DV.G.SF.G..    | 193 |
| AAV90821 | 129 | T....Q...N..R..   | VORKF.NAP.-.     | VYFPRKGTME.H... | SS.DV.G.SS.G..    | 182 |
| AAV90795 | 140 | T....N...N..N..   | ORKF.NSPC.-.     | VYFPRNGT.E.H..  | A.N.EV.G.SF.G..   | 193 |
| AAV90818 | 141 | ....N...N..N..    | ORKF.NDPC.-.     | VYFPRKGT.E.H..  | SS.DV.G.SS.G..    | 193 |
| AAV90785 | 141 | T....N...N..N..   | VORKS.HSPC.-.    | VYFPRNGTME.H... | SN.DV.G.SF.G..    | 194 |
| AAV90754 | 140 | T....N...N..S..   | HRKF.NAPC.-.     | VYFPRNSTMK.Q... | N.EV.G.AH.G..     | 193 |
| AAV90804 | 139 | T....N...N..N..   | K..ORKF.SAPC.-.  | VYFPRKGTME.H... | RS.DV.G.SSHG..    | 192 |
| AAV90780 | 141 | T....N...N..N..   | MVORKF.NSPC.-.   | VYFPRNGMME.H... | SS.DV.S.SF.G..    | 194 |
| AAV90819 | 141 | ....N...N..N..    | ORKF.NDPC.-.     | VYFPRKGT.E.H..  | SS.DV.G.SS.G..    | 193 |
| AAV90817 | 134 | ....N...N..N..    | ORKF.NDPC.-.     | VYFPRKGT.E.H..  | SS.DV.G.SS.G..    | 186 |
| AAV90782 | 141 | T....Q...N..N..   | VORKV.NSPC.-.    | VYFPRNGAME.H... | SS.DV.S.SF.G..    | 194 |
| AAV90822 | 140 | T....N...N..N..   | K.VORKF.NAPC.-.  | VYFPRKGTME.H... | SS.DV.G.PS.G..    | 193 |
| AAV90803 | 136 | T....N...N..S..   | ORKF.SVPC.-.     | VYFPRKGTME.H... | TR.DV.G.SS.GI..   | 189 |
| AAV90813 | 132 | T....N...N..N..   | ORKF.HVPC.-.     | VYFPRKDPME.H... | SS.DV.S.SS.G..    | 185 |
| AAV90805 | 139 | T....N...N..N..   | K..ORKF.SGPC.-.  | VYFPRKGTME.H... | MS.DV.G.SS.GM..   | 192 |
| AAV90823 | 134 | T....N...N..N..   | H..ORKF.NAPC.-.  | VYFPROGTME.H... | SM.DV.G.SA.GI..   | 187 |
| AAV90808 | 140 | T....N...N..N..   | ORKF.NVPC.-.     | VYFPRKGP.E.H..  | SC.DV.G.SS.G..    | 193 |
| AAV90801 | 136 | T....N...N..S..   | ORKF.NAPC.-.     | VYFPRKGTMEGH... | MN.DV.G.SSHGI..   | 189 |
| AAV90797 | 119 | T....N...N..N..   | MORKF.NSPC.-.    | VYFPRNDA.E.H..  | G.N.EV.G.SF.GI..  | 172 |
| AAV90816 | 140 | T....N...N..N..   | ORKF.NVPC-DV     | VYFPRKDP.E.H..  | SS.DV.G.SSHG..    | 193 |
| AAV90786 | 140 | T....N...N..N..   | VORKF.NSLC.-.    | VYFPRNDTME.H... | AN.DV.S.SFHG..    | 193 |
| AAV90800 | 130 | ....N...N..S..    | ORKF.NAPC.-.     | VYFPRKGT.E.H... | MS.DV.G.SSCGI..   | 182 |
| AAV90814 | 138 | T....N...N..N..   | ORKF.YVP-R.      | VYFPRKDPME.H... | SS.DV.G.SS.G..    | 191 |
| AAV90764 | 140 | T....N...N..RN.   | ORKF.NSP.-.      | VYFPRKEAME.Q... | SS.DV.G.SF.G..    | 193 |
| ABR28259 | 18  | T....N...N..N..   | VORKF.NSPCE.-.   | YFPRNGTME.H...  | PS.DV.G.SF.G..    | 71  |
| ABU43519 | 130 | T....N...N..S..   | ORKF.NVPC.-.     | VYFPRKGTME.H... | MN.DF.G.SSHGI..   | 183 |
| ABU43527 | 130 | T....N...N..N..   | ORKF.NAPC.-.     | VYFPRKGTME.H... | MS.DV.G.SSHGL..   | 183 |
| ABR28256 | 18  | T....N...N..N..   | VORKF.NSPCE.-.   | YFPRNGTME.H...  | PS.EV.G.SFHG..    | 71  |
| ABR28246 | 18  | T....N...N..N..   | VORKF.NSPCE.-.   | YFPRNGTME.H...  | PS.EV.G.SF.G..    | 71  |

|          |     |             |                            |                      |     |
|----------|-----|-------------|----------------------------|----------------------|-----|
| ABU43532 | 130 | T...N...N   | .S..QRKF.NAPC-.VYFPRKGTME  | .H...MS.D..G.SSHG..  | 183 |
| AAV90766 | 140 | T...N...N   | .N..QRKF.NSS.E.-YFPRKGTKE  | .H...SS.DV.G.SF.G..  | 193 |
| ABR28285 | 18  | T...N...N   | .N.VQRKF.NSPCE.-YFPRNGTME  | .H...PS.EV.G.SF.G..  | 71  |
| AAV90807 | 140 | T...N...N   | .NFVQ.KF.NVPC-.VYFPRKGP.E  | .H...SS.EV.G.LSHG..  | 193 |
| AAV90794 | 140 | T...N...N   | .D..QRKF.HSPC-.VSFPRNGA.E  | .H..T.N.EV.G.SFHG..  | 193 |
| AAV90820 | 140 | TV...N...N  | .DF.QRKF.NAPC-.VYFSRKSTME  | .H...SS.DV.G.SP.G..  | 193 |
| ABR28245 | 18  | T...N...N   | .N.VQRKF.NSPCE.-YFPRNGTME  | .H...PS.EV.G.SF.G..  | 71  |
| AAV90806 | 114 | T...N...N   | .RK..QRKF.SVPC-.VYFPRKGTME | .H...AS.DV.G.SS.GM.  | 167 |
| AAV90815 | 138 | TM...N...N  | .N..QRKF.SVPC-.YFPRKDP.E   | .Q...PN.DV.G.SS.G..  | 191 |
| ABR28270 | 18  | T...N...N   | .N.VQRKF.NSPCE.-YFPRNGTME  | .H...PS.EV.G.SFHG..  | 71  |
| ABR28255 | 18  | T...N...N   | .N.VQRKF.NSPCE.-YFPRNGTIE  | .H...PS.EV.G.SF.G..  | 71  |
| ABU43538 | 130 | T...N...N   | .S..QRKF.NTPC-.VYFPRKGTME  | .H...MS.DV.G.SSHGI.  | 183 |
| ABR28275 | 18  | T...N...N   | .N.VQRKF.NSPCE.-YFPRNGTME  | .H...PS.EV.G.AF.G..  | 71  |
| ABR28282 | 18  | T...N...D   | .N.VQRKF.NSPCE.-YFPRNGTME  | .H...PS.EV.G.SF.G..  | 71  |
| ABR28247 | 18  | T...N...N   | .N.VQRKF.NSPCE.-YFPRNGTME  | .H...PS.EV.A.SF.G..  | 71  |
| ABR28264 | 18  | T...N...N   | .N.VQRKF.NSPCE.-YFPRNGTME  | .H...XS.EV.G.SF.G..  | 71  |
| ABU43516 | 130 | T...N...N   | .S..QRKF.NNAPC-.VYFPRKGTME | .H...MN.DV.G.SSHGI.  | 183 |
| ABR28258 | 18  | T...N...N   | .N.VQRKF.NSPCE.-YFPRSGTME  | .H...PS.EV.G.SF.G..  | 71  |
| ABU43524 | 130 | T...N...N   | .S..QRKF.NAPC-.VYFPRNGTME  | .H...MS.NV.G.SSHGL.  | 183 |
| ABU43518 | 127 | T...N...N   | .S..QRKF.NAPC-.VYFPRKGTME  | .H...MN.DV.G.SSHGI.  | 180 |
| ABR28262 | 18  | T...N...N   | .N.VHRKF.NSPCE.C-FPRNGTME  | .H...PS.EV.G.SF.G..  | 71  |
| ABS52665 | 130 | T...N...N   | .S..QRKF.NIPC-.VYFPRKGTME  | .H...TS.DV.G.SSHG..  | 183 |
| AAV90784 | 141 | T...N...N   | .N.VQRKF.SSPYG-.VSFPRNSTME | .R...SS.D..GSSF.G..  | 194 |
| ABS52659 | 130 | T...N...N   | .S..QRKF.NIPC-.VYFPRKGTME  | .H...TS.DV.G.SSHGI.  | 183 |
| ABI78912 | 129 | T...N...N   | .NF.QRKF.RNVPC-.VYFPRKGTME | .H...SS.EV.G.SS.G..  | 182 |
| ABR28249 | 18  | T...N...N   | .N.VQRKF.HSPCE.-YFPRNGTME  | .H...SS.EV.G.SF.G..  | 71  |
| ABS52653 | 130 | T...N...N   | .S..QRKF.NIPC-.VYFPRKGTME  | .H...TS.DV.G.SSHG..  | 183 |
| ABS52649 | 130 | T...N...N   | .S..QRKF.NVPC-.VYFPRKGTME  | .H...TS.DV.G.SSHGI.  | 183 |
| ABS52668 | 130 | T...N...N   | .S..QRKF.NIPC-.VYFPRKGTME  | .H...TS.DV.G.SSHGI.  | 183 |
| ABS52663 | 130 | T...N...N   | .S..QRKF.NIPC-.VYFPRKGTME  | .H...TS.DV.G.SSHGI.  | 183 |
| ABS52658 | 130 | T...N...N   | .S..QRKF.NIPC-.VYFPRKGTME  | .H...TS.DV.G.SSHGI.  | 183 |
| ABU43514 | 133 | T...N...YN  | .K..QRKF.SVPC-.VYFPRKGTME  | .H...AS.DV.G.SS.GM.  | 186 |
| ABU43536 | 113 | T...N...N   | .S..QRKF.NAPC-.VYFPRKGTME  | .H...MR.DV.G.SSHGI.  | 166 |
| ABR28248 | 18  | T...N...N   | .N.AQRKF.NSPCE.-YLPRNGTME  | .H...PS.EV.G.SFHG..  | 71  |
| ABS52666 | 130 | T...N...N   | .S..QRKF.NIPC-.VYFPRKGTME  | .H...TS.DV.G.SSHGI.  | 183 |
| ABS52657 | 130 | T...N...N   | .S..QRKF.NIPC-.VYFPRKGTME  | .H...TS.DV.G.SSHGI.  | 183 |
| ABS52662 | 130 | T...N...N   | .S..QRKF.NIPC-.VYFPRKGTME  | .H...TS.DV.G.SSHGI.  | 183 |
| ABR28266 | 18  | T...IN...N  | .N.VQRKF.NSPCE.-YFPRNGTME  | .H...AS.EV.G.SF.G..  | 71  |
| ABS52667 | 129 | T...N...N   | .S..QRKF.NIPC-.VYFPRKGTME  | .H...TS.DV.G.SSHGI.  | 182 |
| ABR28277 | 18  | TT...N...N  | .N..QRKF.NSPCE.-YFPRNGTME  | .H...SS.EV.G.SF.G..  | 71  |
| ABU43509 | 133 | T...N...N   | .K..QRKF.NAPC-.VYFPRKGTME  | .H...MS.DV.G.SS.GM.  | 186 |
| ABR28263 | 18  | T...N...N   | .N.VQRKF.NSPCE.-YFPRNGT.E  | .H...LPS.EV.G.SF.G.. | 71  |
| AAV90809 | 139 | T.Y...N...N | .N..QRKF.SAPC-.VYLPRKGR.E  | .H...SS.EV.S.SS.G..  | 192 |
| ABR28244 | 18  | T...N...N   | .N.VQRKF.NSPCE.-YFPRNGTMA  | .H...AS.EV.G.SF.G..  | 71  |
| ABR28250 | 18  | TT...N...N  | .N.VQRKF.NSPCE.-YFPRNGTME  | .H...SS.EV.G.SF.G..  | 71  |
| ABR28278 | 18  | TT.....N    | .N..QRKF.NSPCE.-YFPRNGTME  | .H...SS.EV.G.SF.G..  | 71  |
| ABR28241 | 18  | T...N...N   | .K.VQRKF.NAPC-.VYFPRKGTME  | .H...PS.AV.G.SS.G..  | 71  |
| ABU43546 | 127 | T...N...N   | .NF.QRKF.RNVPC-.VYFPRKGTME | .H...SS.EV.G.SS.G..  | 180 |
| ABS52654 | 107 | T...N...N   | .S..QRKF.NIPC-.VYFPRKGTME  | .H...TS.DV.G.SSHGI.  | 160 |
| ABS52650 | 130 | T...N...N   | .S..QRKF.NIPC-.VYFPRKGTME  | .H...TS.DV.G.SSHGI.  | 183 |
| ABR28260 | 18  | T...N...N   | .N.VQKGF.NSPCE.-YFPRNGTME  | .H...PS.EV.G.SF.G..  | 71  |
| ABU43531 | 130 | T...N...N   | .N..QRKF.NVPC-.VYFPRKGTME  | .H...MS.DX.G.SSHG..  | 183 |
| ABS52652 | 130 | T...N...N   | .S..QRKF.NIPC-.VYFPRKGTME  | .H...TS.DV.G.SSHGI.  | 183 |
| ABS52656 | 130 | T...N...N   | .S..QRKF.NIPC-.VYFPRKGTME  | .H...TS.DV.G.SSHGI.  | 183 |
| ABR28280 | 18  | T...N...S   | .NAVQRKF.SSPCE.-YFPRNGTME  | .H...PS.DV.G.SF.G..  | 71  |
| ABS52651 | 130 | T...N...N   | .S..QRKF.NIPC-.VYFPRKGTME  | .H...TS.DV.G.SSHGI.  | 183 |

|          |     |                                                         |     |
|----------|-----|---------------------------------------------------------|-----|
| ABS52669 | 130 | T...N...N..S..QRKF.NIPC-.VYFPRKGTME.H...TS.DV.G.SSHGI.  | 183 |
| ABS52655 | 130 | T...N...N..S..QRKF.NIPC-.VYFPRKGTME.H...TS.DV.G.SSHGI.  | 183 |
| ABU43515 | 131 | ...N...N..S..QRKF.NAPC-.VYFPRKGTME.H...MS.DV.G.SSHGI.   | 183 |
| AAV90763 | 142 | ...N...N..RN.VQRKF.NAP-.VYFPRKDTMK.Q...SS.DV.G.SF.GI.   | 193 |
| ABU43542 | 130 | T...N...N..S..QRKF.NIPC-.VYFPRKGTMK.H...TS.DV.G.SSHGI.  | 183 |
| ABK59296 | 88  | T...IN...N..N.VQRKF.SFPCE.-YFPRNGTME.H...SS.EV.GPSF.G.. | 141 |
| ABU43523 | 120 | ...N...N..S..QRKF.NTPC-.VYFPRKGTME.H...KS.DV.G.SSHGI.   | 172 |
| ABR28271 | 18  | T...N...N..N.VQRKF.NSLCD.-YFPRNGTME.H...SR.EV.G.SFHG..  | 71  |
| AAV90777 | 140 | T...K...Q...VO.KL.NSPC-.LFFPRKGP.E.H...SS.DV.G.SLHG..   | 193 |
| ABK59293 | 88  | T...IN...N..N.VQRKF.SFPCE.-YFPRNGTME.H...SS.EV.G.SF.G.. | 141 |
| ABU43534 | 130 | T...N...N..S..QRKF.NAPC-.VYFPRKGTME.H...VS.DV.G.SSHGI.  | 183 |
| ABU43521 | 130 | T...N...N..S.V.RKF.NAPC-.VYFPRKGTME.H...VS.DV.G.SSHGI.  | 183 |
| ABU43537 | 130 | T...IN...N..S..QRKF.SAPC-.VYFPRKGTME.H...MS.DV.G.SSHGI. | 183 |
| ABK59291 | 88  | T...IN...N..N.VQRKF.NFPCE.-YFPRNGT.E.H...SS.EV.G.SF.G.. | 141 |
| ABR28268 | 18  | T...N...N..N.VQRKFGSSPCE.-YFPRNGT.E.H...SS.EV.G.SF.G..  | 71  |
| AAV90778 | 140 | T...K...Q...A.Q.KL.NSPC-.IFFSRNGP.E.H...SS.DV.G.SSHG..  | 193 |
| ABR28273 | 18  | T...IN...N..N.VQRKF.NLPCG.-YFPRNGT.E.H...SS.EV.G.SFHG.. | 71  |
| ABK59284 | 89  | T...IN...N..N.VQRKF.NLPCG.-YFPRNGT.E.H...SS.EV.G.SF.G.. | 142 |
| AAV90756 | 134 | T.Y.N...N..RN..QRKF.NSP.-VYFPRKSTKE...PN.DV.A.SFHG..    | 187 |
| ABU43512 | 133 | T...N...N..K..QRKF.SAPC-.VYFPRKGTME.X...MS.DV.G.SSHGM.  | 186 |
| ABR28272 | 18  | T...I...N..N.VQRKF.NSPCE.-SFPRNGTME.H...PS.EV.G.SF.G..  | 71  |
| ABK59288 | 89  | T...IN...N..N.VQRKF.NLPCG.-YFPRNGT.E.H...SS.EV.G.SFHG.. | 142 |
| ABU43507 | 131 | ...N...N..S..QRKF.NAPC-.VYFPRKGT.E.H...MS.DV.G.SSCGI.   | 183 |
| ABU41687 | 130 | T...N...N..S..QRKF.NVPC-.VYFPRKGTME.H...IS.DV.G.SSHGI.  | 183 |
| ABR28242 | 18  | T...N...N..N.VQRKF.NSPCE.-YFPR.GTME.H...SR.EV.GPSFHG..  | 71  |
| ABU43545 | 130 | T...N...N..S.VQRKF.SVPC-.VYFPRKGTME.H...TC.EV.G.SSHGI.  | 183 |
| ABS52672 | 130 | T.Y.N...N..S..QRKF.NIPC-.VYFPRKGTME.H...TS.DV.G.SSHGI.  | 183 |
| ABI78885 | 123 | T...K...N..NF..QRKF.NIP.-VYFPRNGPME.H...SG.EV.G.SAHG..  | 176 |
| ABK59295 | 88  | T...IN...N..N.VQRKF.SFPCE.-YFPRNGTME.H...SS.EV.GPSF.G.. | 141 |
| ABS52664 | 130 | T...N...N..S..QRKF.NIPC-.VYFPRKGTXE.H...TS.DV.G.SSHGI.  | 183 |
| ABS52671 | 130 | T.Y.N...N..S..QRKF.NIPC-.VYFPRKGTME.H...TS.DV.G.SSHGI.  | 183 |
| ABK59282 | 88  | T...IN...N..N.VQRKF.NFP.E.-YFPRNGAME.H...SS.EV.G.SF.G.. | 141 |
| ABK59285 | 88  | T...IN...N..N.VQRKF.NLPCG.-YFPRNGT.E.H...SS.EV.G.SF.G.. | 141 |
| ABI78880 | 120 | T...K...N..NF..QRKF.NVP.-VYFPRNGPME.H...SG.EV.G.SAHG..  | 173 |
| ABK59315 | 89  | T...IN...N..N.VQRKF.NFPCE.-YFPRNGTME.H...AS.EV.S.SF.G.. | 142 |
| ABR28265 | 18  | T...IN...N..N.VQRKF.NFPCE.-YFPRNGTME.Q...SS.V.G.SF.G..  | 71  |
| ABB84907 | 53  | T...N...N..S..QRKF.NAPC-.VYFPRKGTME.H...NS.DV.G.SS.GI.  | 106 |
| ABU43511 | 116 | T...N...N..K..QRKF.SAPC-.VYFPRKGTME.R...MS.DV.G.SPHGR.  | 169 |
| ABS52661 | 130 | T...N...N..S..QRKF.NIPC-.VYFPRKGTME.H...TS.DV.G.SSPGI.  | 183 |
| ABR28284 | 18  | T...IN...N..N.VQRKF.NFOCE.-YFPRNGTME.H...SS.EV.G.SF.G.. | 71  |
| ABU41702 | 115 | T...N...N..RS..QRKF.NVPC-.VYFPRKGTME.Q...TS.DV.G.SS.GI. | 168 |
| ABI78917 | 123 | T...K...N..NF..QRKF.NVP.-VYFPRNGPME.H...SG.EV.G.SAHG..  | 176 |
| ABU43526 | 130 | T...N...N..S..KRKF.NAPC-.VYFPRKGTME.H...MS.D.G.SSHGF.   | 183 |
| ABK59316 | 84  | T...IN...N..N.VQRKFXNSPC.-XYFPRNGTME.H...AS.EV.G.SF.G.. | 137 |
| AAT36580 | 134 | T.Y.N...N..RN..QRKF.NSP.-VYFPRKSTLE...PN.DV.A.SF.G..    | 187 |
| ABI78870 | 123 | T...K...N..NF..QRKF.NVP.-VYFPRNGPME.H...SG.EV.G.SAHG..  | 176 |
| AAT36587 | 134 | T.Y.N...N..RNI.QRKS.NSP.-VYFPRKSTME...PS.DV.A.SFHG..    | 187 |
| AAT36586 | 134 | T.Y.N...N..RNI.QRKS.NSP.-VYFPRKSTME...PS.DV.A.SFHG..    | 187 |
| ABI78907 | 123 | T...K...N..NF..QRKF.NVP.-VYFPRNGPME.H...SG.EV.G.SAHG..  | 176 |
| ABI78882 | 123 | T...K...N..NF..QRKF.NVP.-VYFPRNGPME.H...SG.EV.G.SAHG..  | 176 |
| ABI78887 | 123 | T...K...N..NF..QRKF.NVP.-VYFPRNGPME.H...SG.EV.G.SAHG..  | 176 |
| ABU41695 | 130 | T...N...N..RS..QRKF.NVPC-.VYFPRKGTME.Q...TS.DV.G.SS.GI. | 183 |
| ABU41706 | 121 | T...N...N..RS..QRKF.NVPC-.VYFPRKGTME.Q...TS.DV.G.SSHGI. | 174 |
| ABI78924 | 123 | T...K...N..NF..QRKF.NVP.-VYFPRNGPME.H...SG.EV.G.SAHG..  | 176 |
| ABI78898 | 123 | T...K...N..NF..QRKF.NVP.-VYFPRNSPME.H...SG.EV.G.SAHG..  | 176 |
| ABI78909 | 123 | T...K...N..NF..QRKF.NVP.-VYFPRNGPME.H...SG.EV.G.SAHG..  | 176 |



|          |     |            |                            |                     |     |
|----------|-----|------------|----------------------------|---------------------|-----|
| ABR28243 | 18  | T...N...N  | .N.VQRKF.NSPCE.-YFPRHGTME  | .H...SG.EV.A.SFHG.. | 71  |
| ABK59292 | 88  | T...IN...N | .N.VQRKF.SFPC.-YFPRNGPME   | .H...SS.EV.G.SF.G.. | 141 |
| ABU43517 | 130 | T...N...N  | .XS..QRKF.NAPC.-VYFPRKGTME | .H...MN.DV.G.SSHGI. | 183 |
| ABU43544 | 130 | T...N...N  | .S..QRKF.SVPC.-VYFPRKGTME  | .H...TR.DV.G.SSHGI. | 183 |
| ABS52647 | 121 | T.....N    | .RS..QRKF.NVPC.-VYFPRKGTME | .Q...TS.DV.G.SSHGI. | 174 |
| ABR28283 | 18  | T...N...N  | .N.VQRKF.NSPCE.-HFPRNGTME  | .HR..PS.EV.G.SF.G.. | 71  |
| ABS52646 | 130 | T...N...N  | .RS..QRKF.NVPC.-VYFPRKGTME | .Q...AS.EV.G.SSHGI. | 183 |
| ABK59273 | 88  | T...IN...N | .N.VQRKF.NLPCE.-YFPRNGT.E  | .H...SS.EV.G.SF.G.. | 141 |
| ABU41707 | 121 | T...N...N  | .RS..QRKF.NVPC.-VYFPRKGTME | .Q...TS.DV.G.SSHGI. | 174 |
| ABU41696 | 130 | T...N...N  | .RS..QRKF.NVPC.-VYFPRKGTME | .Q...TS.DV.G.SSHGI. | 183 |
| ABK59274 | 88  | T...IN...N | .N.VQRKF.NLPCE.-YFPRNGT.E  | .H...SS.EV.G.SF.G.. | 141 |
| ABU43508 | 130 | ...N...N   | .S..QRKF.NAP.-VYFPRKGT.E   | .H...MS.DV.G.SSCGI. | 182 |
| ABI78888 | 123 | T...K...N  | .NF.QRKF.NVP.-VYFPRNGPME   | .H...SG.EV.G.SA.G.. | 176 |
| ABI78875 | 123 | T...K...N  | .NF.QRKF.NVP.-VYFPRNGPME   | .H...TG.EV.G.SV.G.. | 176 |
| ABI78873 | 123 | T...K...N  | .NF.QRKF.NVP.-VYFPRNGPME   | .H...SG.EV.G.SA.G.. | 176 |
| ABI78901 | 123 | T...K...N  | .NF.QRKF.NVP.-VYFPRNGPME   | .H...SG.EV.G.SA.G.. | 176 |
| ABK59301 | 89  | T...IN...N | .N.VQRKF.NLPCE.-YFPRNGTTE  | .H...SS.EV.G.SF.G.. | 142 |
| ABI78866 | 122 | T...K...N  | .NF.QRKF.NVP.-VYFPRNGPME   | .H...SG.EV.G.SA.G.. | 175 |
| ABI78921 | 124 | T...N...N  | .NF.Q.KF.NVPC.-VYFPRKGP.E  | .H...PS.EV.G.LSCG.. | 177 |
| ABI78925 | 123 | T...K...N  | .NF.QRKF.NVP.-VYFPRNGPME   | .H...SG.EV.G.SA.G.. | 176 |
| ABR28269 | 18  | T...IN...N | .N.VQRKF.NFPC.-YFPRNGTAE   | .H...SS.EV.G.SF.G.. | 71  |
| ABI78918 | 123 | T...K...N  | .NF.QRKF.NVP.-VYFPRNGPME   | .H...SG.EV.G.SA.G.. | 176 |
| ABI78858 | 123 | T...K...N  | .NF.QRKF.NVP.-VYFPRNGPME   | .H...SG.EV.G.SA.G.. | 176 |
| ABI78897 | 108 | T...K...N  | .NF.QRKF.NVP.-VYFPRNGPME   | .H...SG.EV.G.SA.G.. | 161 |
| ABI78889 | 91  | T...K...N  | .NF.QRKF.NVP.-VYFPRNGPME   | .H...SG.EV.G.SA.G.. | 144 |
| ABI78859 | 123 | T...K...N  | .NF.QRKF.NVP.-VYFPRNGPME   | .H...SG.EV.G.SA.G.. | 176 |
| ABI78884 | 123 | T...K...N  | .NF.QRKF.NVP.-VYFPRNGPME   | .H...SG.EV.G.SA.G.. | 176 |
| ABI78862 | 123 | T...K...N  | .NF.QRKF.NVP.-VYFPRNGPME   | .H...SG.EV.G.ST.G.. | 176 |
| ABI78876 | 123 | T...K...N  | .NF.QRKF.NVP.-VYFPRNGPME   | .H...SG.EV.G.ST.G.. | 176 |
| AAV90768 | 137 | ...K...Q   | ...VQ.KL.NSPC.-FFPRKSL.E   | .H...PS.DV.GASFHG.. | 189 |
| AAV59310 | 89  | T...IN...N | .N.VQRKF.NLPCE.-YFPRNGTTE  | .H...SS.EV.G.SF.G.. | 142 |
| AAV90770 | 140 | T...K...Q  | ...VQ.KL.NSPC.-IFFSRKCP.E  | .H...SS.DV.G.SS.G.. | 193 |
| ABK59313 | 89  | T...IN...N | .N.VQRKF.NLPCE.-YFPRNGTTE  | .H...SS.EV.G.SF.G.. | 142 |
| ABK59309 | 87  | T...IN...N | .N.VQRKF.NLPCE.-YFPRNGTTE  | .H...SS.EV.G.SF.G.. | 140 |
| AAV90776 | 140 | T...K...H  | .I.LQ.KL.NSPC.-IFFPRKGS.E  | .H...SS.DV.G.SSQG.. | 193 |
| ABB84908 | 53  | T...N...N  | .S..QRKF.NAPC.-VYFPRKGTME  | .H...NS.EV.G.SSHGI. | 106 |
| ABU41700 | 130 | T...N...N  | .RS..QRKF.NVPC.-VYFPRKGTME | .Q...TS.DV.G.SSHGI. | 183 |
| ABK59304 | 89  | T...IN...N | .N.VQRKF.NLPCE.-YFPRNGTXE  | .H...SS.EV.G.SF.G.. | 142 |
| ABI78902 | 123 | T...K...N  | .NF.QRKF.NVP.-VYFPRNGPME   | .H...SG.EV.G.SA.G.. | 176 |
| ABI78863 | 123 | T...K...N  | .NF.QRKF.NVP.-VYFPRNGPME   | .H...SG.EV.G.SA.G.. | 176 |
| ABR28281 | 18  | T...N...S  | .N.VQRKF.NSPCE.-YFPRNGTME  | .HS..PS.EV.G.SFCG.. | 71  |
| ABK59300 | 86  | T...IN...N | .N.VQRKF.NLPCE.-YFPRNGTTE  | .H...SS.EV.G.SF.G.. | 139 |
| ABK59314 | 88  | T...IN...N | .N.VQRKF.NXPCE.-YFPRNGTXE  | .H...SS.EV.G.SF.G.. | 141 |
| ABI78881 | 123 | T...K...N  | .NF.QRKF.NVP.-VYFPRNGPME   | .H...SG.EV.G.SA.G.. | 176 |
| AAT36591 | 134 | T.Y.N...N  | .RNM.QRKF.NSP-N.VYFPRKSTME | ...PS.NV.A.SFHG..   | 187 |
| ABU41698 | 115 | T...N...N  | .RS..QRKF.NVPC.-VYFPRKGTME | .Q...TS.DV.G.SSHGI. | 168 |
| ABK59302 | 88  | T...IN...N | .N.VQRKF.NLPCE.-YFPRNGTTE  | .H...SS.EV.G.SF.G.. | 141 |
| ABU41701 | 130 | T...N...N  | .RS..QRKF.NVPC.-VYFPRKGTME | .Q...TS.DV.G.SSHGI. | 183 |
| ABU41699 | 112 | T...N...N  | .RS..QRKF.NVPC.-VYFPRKGTME | .Q...TS.DV.G.SSHGI. | 165 |
| ABI78911 | 123 | T...K...N  | .NF.QRKF.NVP.-VYFPRNGPME   | .H...SN.EV.GISA.G.. | 176 |
| ABR28251 | 18  | T.T.N...N  | .N.VQRKF.NSPCE.-YFPRNGTME  | .H...SS.EV.G.SFCG.. | 71  |
| AAV90762 | 140 | T...N...N  | .RN.VQRKF.NAP.-VYFPRKDTT   | .Q...SS.DV.S.SF.GI. | 193 |
| ABU43510 | 133 | T...N...N  | .K..QRKF.SAXC.-VYFPRKGTME  | .H...GS.DV.G.SS.GM. | 186 |
| ABI78867 | 123 | T...K...N  | .NF.QRKF.NVP.-VYFPRNGPME   | .H...SG.EV.G.SA.G.. | 176 |
| ABU43522 | 2   | T...N...N  | .S..QRKF.NAPC.-VYFPRKGTME  | .H...MN.DV.G.SSHGI. | 55  |
| ABU41690 | 130 | T.....N    | .RS..QRKF.NVPC.-VYFPRKGTME | .Q...TS.DV.G.SSHGI. | 183 |

|          |     |              |                                               |     |
|----------|-----|--------------|-----------------------------------------------|-----|
| ABU41709 | 118 | T.....N      | RS..QRKF.NVPC-.VYFPRKGTME.Q...TS.DV.G.SSHGI.  | 171 |
| ABK59303 | 89  | T...IN...N   | .N.VQRKF.NLPCE.-YFPRNGTKE.H...SS.EV.G.SF.G..  | 142 |
| ABU43539 | 118 | T...N...N    | .I..QRKF.NIPC-.VYFPRKGTKE.H...TS.DV.G.SSHGI.  | 171 |
| ABU43530 | 130 | T...T...H..  | X..QRKF.NAPC-.VYFPRKGTME.H...MS.D..G.SSHGI.   | 183 |
| ABK59306 | 88  | T...IN...N   | .N.VQRKF.NLPCE.-YFPRNGTXE.H...SS.EV.G.SF.G..  | 141 |
| ABU41705 | 121 | T...N...N    | RS..QRKF.NVPC-.VYFPRKGTME.Q...TS.DV.G.SSHGI.  | 174 |
| ABU43528 | 130 | T...N...N    | RS..QRKF.NAPC-.VYFPRKGTME.H...MS.DV.G.SSSGL.  | 183 |
| AAT36592 | 100 | T.Y..N...N   | RNM.QRKF.NSP-N.VYFPRKSTME....PS.NV.A.SFHG..   | 153 |
| ABI78894 | 123 | T...K...N    | .NF.QRKF.NVP.-.VYFPRNGPME.H...SG.EV.G.SA.G..  | 176 |
| ABU41704 | 130 | T...N...N    | RS..QRKF.NVPC-.VYFPRKGTME.Q...TS.DV.G.SSHGI.  | 183 |
| ABI78856 | 91  | T...K...N    | .NF.QRKF.NVP.-.VYFPRNGPME.H...SG.EV.G.LA.G..  | 144 |
| ABU43529 | 130 | T...N...N    | .C..QRKF.NAPC-.LYFPRKGAME.H...MS.DV.G.SSNGL.  | 183 |
| ABM05464 | 110 | T.Y..N...N   | RN..QRKF.NSP.-.VYFPRKSTME....PS.DV.A.SF.G..   | 163 |
| ABI78891 | 121 | T...K...N    | .NF.QRKF.NVP.-.YFPRNGPME.H...SG.EV.G.SA.G..   | 174 |
| ABI78877 | 123 | T...K...N    | .NF.QRKF.NVP.-.VYFPRNGPME.H...XSG.EV.G.ST.G.. | 176 |
| ABU41697 | 119 | T...N...N    | RS..QRKF.NVPC-.VYFPRKGTME.Q...TS.DV.G.SS.GI.  | 172 |
| AAV90769 | 125 | T...K...H... | VO.KL.NSPC-.AFFRRAP.E.H...ASS.DV.G.SS.GM.     | 178 |
| ABK59311 | 88  | T...IN...N   | .NIVQRKF.NLPCE.-YFPRNGTTE.H...SS.EV.G.SF.G..  | 141 |
| ABK59271 | 88  | T...IN...N   | .N.VQRKF.NLPCE.-YFPRNGTTE.H...SS.EV.G.SF.G..  | 141 |
| ABI78883 | 123 | T...K...N    | .NF.QRKF.NVP.-.VYFPRNGPME.H...SG.EV.G.SA.G..  | 176 |
| ABR28276 | 18  | T.Q..N...N   | .N.VQRKF.NFPCE.-SFPRNGAME.H...SS.EV.G.SFHG..  | 71  |
| ABI78910 | 123 | T...K...N    | .NF.QRKF.NVP.-.VYFPRNGPME.H...SG.EV.G.XA.G..  | 176 |
| ABK59307 | 88  | T...IN...N   | .NIVQRKF.NLPCE.-YFPRNGTTE.H...SS.EV.G.SF.G..  | 141 |
| ABR28261 | 18  | T...N...S    | .NAVQRKF.NSPHE.-YFPRNGAME.H...PS.EV.G.SF.G..  | 71  |
| ABI78930 | 108 | T...K...N    | .NF.QRKF.NVP.-.VYFPRNGLME.H..TSG..V.G.LA.G..  | 161 |
| ABU41691 | 113 | T...N...N    | RS..QRKF.NVPC-.VYFPRKGTME.Q...TS.DV.G.SSHGI.  | 166 |
| ABB84887 | 53  | T.....N      | .SF.QRKF.NVPC-.VYFPRKGTME.H...TS.DV.G.SSHGI.  | 106 |
| ABK59286 | 88  | T...IN...N   | .N.VQRKF.NLXCG.-YFPRNGT.E.H...SS.EV.G.SF.G..  | 141 |
| ABI78908 | 123 | T...K...N    | .NF.QRKF.NVP.-.VYFPRNGPME.H...SG.EV.G.LA.G..  | 176 |
| ABM05465 | 102 | T.Y..N...N   | RN..QRKF.NSP.-.VYFPRKSTME....PS.DV.A.SF.G..   | 155 |
| ABU41710 | 116 | T...N...N    | RS..QRKF.NVPC-.VYFPRKGTME.Q...TS.DV.G.SSHGI.  | 169 |
| ABM05448 | 110 | T.Y..N...N   | RN..QRKF.NSP.-.VYFPRKSTME....PS.DV.A.SFHG..   | 163 |
| ABS52648 | 130 | T...N...N    | .S..Q.KF.NVPC-.AYFPRKGAME.H...TS.NV.G.SSHGI.  | 183 |
| ABK59279 | 88  | T...IN...N   | .S.VQRKF.NFPPE.-YFPRNGAME.H...SS.EV.G.SF.G..  | 141 |
| ABU41703 | 130 | T...N...N    | RS..QRKF.NVPC-.VYFPRKGTME.Q...TS.DV.G.SSHGI.  | 183 |
| ABU41688 | 130 | T...N...N    | RS..QRKF.NVP.-.VYFPRKGTME.Q...TS.DV.G.SSHGI.  | 183 |
| ABI78893 | 123 | T...K...N    | .NF.QRKF.NVP.-.VYFPRNGPME.H...SG.E...SA.G..   | 176 |
| ABK59275 | 88  | T...IN...N   | .N.VQRKF.NLPCE.-FFPRNGT.E.H...SS.EV.G.SF.G..  | 141 |
| ABI78886 | 123 | T...K...N    | .NF.QRKF.NVP.-.VYFPRNGPME.H...SG.EV.G.LA.G..  | 176 |
| ABU41689 | 130 | T...N...N    | RS..QRKF.NVP.-.VYFPRKGTME.Q...TS.DV.G.SSHGI.  | 183 |
| AAT36582 | 134 | T.Y..N...N   | RN..QRKF.NSP.-.VYFPRKSTLE....PN.YV.A.SF.G..   | 187 |
| ABS52670 | 124 | T.Y..N...N   | .S..QXKF.NIPC-.VYFPRKGTME.H...TS.DV.G.SSHGI.  | 177 |
| ABI78927 | 123 | T...K...N    | .NF.QRKF.NVP.-.VYFPRNGPME.H...SG.EV.G.LAHG..  | 176 |
| ABU41708 | 130 | T...N...N    | RS..QRKF.NVPC-.VYFPRKGTME.Q...TS.DV.G.SSHGI.  | 183 |
| ABU41692 | 122 | T...N...N    | RS..QRKF.NVPC-.VYFPRKGTMD.Q...AS.DV.G.SSHGI.  | 175 |
| ABK59305 | 89  | T...IN...N   | .N.VQRKF.NLPCE.-YFPRNGTXE.H...SS.EV.G.SF.G..  | 142 |
| ABK59281 | 88  | T...IN...N   | .N.VQRKF.NFP.-.KYFPRNGAME.H...SS.EV.G.SFXG..  | 141 |
| ABK59278 | 88  | T...IN...N   | .X.VQRKF.NFPPE.-YFPRNGTME.H...SS.EV.G.SF.G..  | 141 |
| ABI78874 | 123 | T...K...N    | .NF.QRKF.NVP.-.VYFPRNGPME.H...SG.EV.G.LA.G..  | 176 |
| ABK59294 | 88  | T.X.IN...N   | .N.VQRKF.SFPCE.-YFPRNGTME.H...SS.EV.G.SF.G..  | 141 |
| ABI78923 | 123 | T...K...N    | .NF.QRKF.NVP.-.VYFPRNGPME.H...SG.EV.G.LA.G..  | 176 |
| ABB84890 | 53  | T.....S      | .SF.QRKF.NVPC-.VYFPRKGTME.H...TS.DV.G.SSHGI.  | 106 |
| AAV90771 | 125 | T...K...Q... | VO.KL.NSPC.-IFFSRKCP.E.H...S.DV.G.SS.G..      | 178 |
| ABK59270 | 88  | T...IN...N   | .N.VQRKF.NLPCE.-YFPRNGTTE.H...SS.EV.G.SF.G..  | 141 |
| ABI78860 | 94  | T...K...N    | .NF.QRKF.NVP.-.VYFPRNGPME.H...SG.EV.G.SA.G..  | 147 |
| AAT36584 | 134 | T.Y..N...N   | RN..QRKS.NSP.-.VHFPRKSTME....PS.DV.A.SFHG..   | 187 |

|          |     |                                                          |     |
|----------|-----|----------------------------------------------------------|-----|
| ABI78931 | 123 | T...K...N..NF.ORKF.NVP.-.VYFPRNGPME.H...SG.EV.G.XA.G..   | 176 |
| ABU43540 | 130 | T...N...S..R..ORKF.SVPC-.VYFPRKGTME.Y...TS.EV.G.SS.GI.   | 183 |
| ABK59280 | 88  | T...IN...N..B.VORKF.NFPXE.-YFPRNGAME.H...SS.EV.G.SF.G..  | 141 |
| ABR28267 | 18  | T...N...N..N.VORKFGSSPCE.-YFPRNGT.E.H...SN..V.G.SFCG..   | 71  |
| ABI78900 | 123 | T...K...N..NF.ORKF.NVP.-.VYFPRNGPME.H...SG.EV.C.SA.G..   | 176 |
| ABI78903 | 118 | T...N...XN..HF.Q.KF.NVPC-.VYFPRKGP.E.H...SN.EV.G.LT.G..  | 171 |
| ABM05453 | 110 | T.Y.N...N..RN..ORKF.NSP.-.VYFPRKSTME...PS.NV.A.SFHG..    | 163 |
| ABK59298 | 88  | T...IN...N..N.VORKF.SFPCE.-YFPRNGTME.H...XSS.XV.GPSF.G.. | 141 |
| AAT36585 | 134 | T.Y.N...N..RN..ORKS.NSP.-.VHFPRKSTME...PS.DV.A.SFHG..    | 187 |
| ABM05449 | 110 | T.Y.N...N..RN..ORKF.NSP.-.VYFPRKSTME...PS.DV.A.SFHG..    | 163 |
| ABI78892 | 123 | T...K...N..NF.ORKF.NVP.-.VYFPRNGPME.H...XSG.EV.G.SA.G..  | 176 |
| ABU43525 | 130 | T...N...N..R..ORKF.NAPC-.LYFPRKGMQ.H...MS.DV.G.SSNGL.    | 183 |
| ABU43513 | 133 | T...N...N..RK..ORKF.SVPC-.VYFPRKGTME.H...AS.DV.G.SS.GM.  | 186 |
| ABU43533 | 130 | T...N...N..S..KRKF.NAPC-.VYFPRKXTME.Y...VS.DV.G.SSHGI.   | 183 |
| ABK59289 | 88  | T...IN...N..N.VORKF.NFPCE.-YFPRNGT.E.H...SS.EV.G.SFLG..  | 141 |
| ABM05468 | 107 | T.Y.N...N..RN..ORKF.NS-.S.VYFPRKSTME...PS.DV.A.SFHG..    | 160 |
| ABI78919 | 123 | T...K...N..NF.ORKF.NVX.-.VYFPRNGPME.H...SG.EV.G.SA.G..   | 176 |
| ABR28257 | 18  | T...IN...K..N.VORKFNNSPCE.-YFPRNGTME.H...AN.EV.G.SFHGX.  | 71  |
| ABB84899 | 53  | T.....S..SF.ORKF.NVPC-.VYFPRKGTME.H...AS.DV.G.SSHGL.     | 106 |
| ABK59277 | 88  | T...IN...N..S.VORKF.NFPXE.-YFPRNGAME.H...SS.XV.G.SF.G..  | 141 |
| AAV90755 | 134 | T.Y.N...N..RN..ORKS.NS-QS.VYFPRKSTME...PS.DV.S.SF.G..    | 187 |
| ABM05467 | 107 | T.Y.N...N..RN..ORKF.NS-.S.VYFPRKSTME...PS.DV.A.SFHG..    | 160 |
| ABK59272 | 89  | T...IN...X..N.VORKF.NLPCE.-YFPRNGTXE.H...SS.EV.G.SF.G..  | 142 |
| ABI78878 | 123 | T...K...N..NF.ORKF.NVP.-.VYFPRNGPME.H...SG.EV.G.LA.G..   | 176 |
| ABI78896 | 123 | T...K...N..NF.ORKF.NVP.-.VYFPRNGPIE.H...SG.EV.G.LA.G..   | 176 |
| ABR28279 | 18  | T...IN...N..N.VORKF.NLPCE.-YFPRNGTTE...SS.EV.G.SF.G..    | 71  |
| ABB84866 | 53  | T.....S..SF.ORKF.NVPC-.VYFPRKGTME.H...AS.DV.G.SPHGI.     | 106 |
| ABM05470 | 110 | T.Y.N...N..RD..ORKF.NSP.-.VYFPRKSTME...PS.DV.A.SFHGI.    | 163 |
| ABI78915 | 123 | T...K...N..KF.ORKF.NVP.-.YFPRNGSME.H...SG.EV.G.SA.G..    | 176 |
| AAV90773 | 129 | T...K...Q...VQ.KL.NSPC-.FSPRQGPAE.H...SS.DV.G.SS.G..     | 182 |
| ABB84877 | 53  | T.....S..SF.ORKF.NVPC-.VYFPRKGTME.H...TS.DV.G.SSHGI.     | 106 |
| ABK59287 | 88  | ...IN...N..N.VORKF.NLPCG.-YFPRNGT.E.H...SS.EV.G.SFXG..   | 140 |
| ABM05471 | 107 | T.Y.N...N..RN..ORKF.NS-.S.VYFPRKSTME...PS.DV.A.SFHG..    | 160 |
| ABB84892 | 53  | T.....S..SF.ORKF.NVPC-.VYFPRKGTME.H...TS.DV.G.SSHGI.     | 106 |
| ABK59299 | 88  | T...IN...N..N.VORKF.NXPCE.-YFPXNGTXE.H...SS.EV.G.SF.G..  | 141 |
| ABI78916 | 123 | T...K...N..NF.ORKF.NVP.-.VYFPRNGPME.H...SG.EV.G.SA.G..   | 176 |
| ABI78928 | 105 | T...N...N..RF.ORKF.NA-.S..YFPRRGP.E.H...SS.EV...SSHG..   | 158 |
| ABB84901 | 53  | T.....S..SF.ORKF.NVPC-.VYFPRKGTME.H...AS.DV.G.SSHGL.     | 106 |
| ABB84876 | 53  | T.....S..SF.ORKF.NVPC-.VYFPRKGTME.H...TS.DV.G.SSHGI.     | 106 |
| ABB84898 | 53  | T.....S..SF.ORKF.NVPC-.VYFPRKGTME.H...TS.DV.G.SSHGI.     | 106 |
| ABI78895 | 123 | T...K...N..NF.ORKF.NVP.-.VYFARNGPME.H...SG.EV.G.SA.G..   | 176 |
| ABI78879 | 82  | T...K...N..NF.ORKF.NVP.-.VYFPRNGPME.H...SG.EV.G.SA.G..   | 135 |
| ABU41694 | 113 | T...N...N..RS..ORKF.NVPC-.VYFPRKGTMX.Q...AS.DV.G.SSHGI.  | 166 |
| ABI78861 | 123 | T...K...N..NF.ORKF.NVP.-.VYFPRNGPME.HX..SG.EV.G.SA.G..   | 176 |
| ABB84894 | 53  | T.....S..SF.ORKF.NVPC-.VYFPRKGTME.H...TS.DV.G.SSHGI.     | 106 |
| ABB84900 | 53  | T.....S..SF.ORKF.NVPC-.VYFPRKGTME.H...AS.DV.G.SSHGL.     | 106 |
| ABM05447 | 110 | T.Y.N...N..RN..ORKF.NSP.-.VHFPRKSTME...PS.DV.A.SFHG..    | 163 |
| ABK59290 | 88  | T...IN...N..N.VORKF.NFPCE.-YFPRNGT.E.H...SS.EVXG.SF.G..  | 141 |
| ABI78922 | 123 | T...N...XN..HF.Q.KF.NVPC-.VYFPRKGP.E.H...SN.EV.G.LT.G..  | 176 |
| ABU43535 | 130 | T...KX...N..S..ORKF.NAPC-.VYIIPRKGTME.H...MS.DV.G.SS.GI. | 182 |
| ABM05466 | 107 | T.Y.N...N..RN..ORKF.NS-.S.VYFPRKSTME...PS.DV.A.SFHG..    | 160 |
| ABB84891 | 53  | T.....S..SF.ORKF.NVPC-.VYFPRKGTME.H...TS.DV.G.SSHGI.     | 106 |
| ABB84893 | 53  | T.....S..SF.ORKF.NVPC-.VYFPRKGTME.H...TS.DV.G.SSHGI.     | 106 |
| ABB84902 | 53  | T.....S..SF.ORKF.NVPC-.VYFPRKGTME.H...TS.DV.G.SSHGI.     | 106 |
| ABK59308 | 88  | T...IN...N..NXVORKF.NLPCE.-YFPRNGTTE.H...SS.EV.G.SF.G..  | 141 |
| AAT36583 | 134 | T.Y..N...N..RN..ORKF.NSP.-.VYFPRKSTLE...PN.DV.X.SFHG..   | 187 |

|          |     |                                                          |     |
|----------|-----|----------------------------------------------------------|-----|
| ABI78899 | 123 | T...K...N..NF.QRKF.NVP.-.VYFPRNGXME.H...SG.EV.C.SA.G..   | 176 |
| ABB84875 | 53  | T.....S..SF.QRKF.NVPC-.VYFPRKGTME.H...TS.DV.G.SSHGI.     | 106 |
| ABK59318 | 88  | T...IN...N..N.VQRKF.NFP.E.-.YFPSNGTME.H...SS.EV.G.SFHG.. | 141 |
| ABM05462 | 110 | T.Y..N...N.RD..QRKF.NSP.-.VYFPRKSTME.V...PS.DV.A.SFHGI.  | 163 |
| ABM05474 | 110 | T.Y..N...N.RD..QRKF.NSP.-.VYFPRKSTME...PS.DV.A.SFHG..    | 163 |
| ABI78871 | 123 | T...K...N..NF.Q.KF.NVP.-.VYFPRNGPKE.H...SG.EV.G.SA.G..   | 176 |
| ABB84889 | 53  | T.....S..SF.QRKF.NVPC-.VYFPRKGTME.H...TS.DV.G.SSHGI.     | 106 |
| ABB84882 | 53  | T.....S..SF.QRKF.NVPC-.VYFPRKGTME.H...TS.DV.G.SSHGI.     | 106 |
| ABK59283 | 88  | T...IN...N..N.VQRKF.NLPCE.-.YFPXNGTAE.H...SS.EV.G.SF.G.. | 141 |
| AAT36581 | 134 | T.Y..N...N.RN..QRKF.NSP.-KVYFPRKSTLE...PN.YV.A.SF.G..    | 187 |
| ABB84883 | 53  | T.....S..SF.QRKF.NVPC-.VYFPRKGTME.H...TS.DV.G.SSHGI.     | 106 |
| AAT36594 | 134 | T.Y..N...K..RN..QRKF.NSP-N.VYFPRKSTME...PS.NV.A.SFCG..   | 187 |
| ABB84895 | 53  | T.....S..SF.QRKF.NVPC-.VYFPRKGTME.H...TS.DV.G.SSHGI.     | 106 |
| ABB84886 | 53  | T.....S..SF.QRKF.NVPC-.VYFPRKGTME.H...TS.DV.G.SSHGI.     | 106 |
| ABU41693 | 130 | T...N...N..RS..QRKF.NVPC-.VYFPRKGTMD.H...AS.DX.G.SSHGI.  | 183 |
| ABB84888 | 53  | T.....S..SF.QRKF.NVPC-.VYFPRKGT.E.Q...TS.DV.G.SSHGI.     | 106 |
| ABM05460 | 110 | T.Y..N...N.RD..QRKF.NSP-N.VYFPRKSTME...PS.DV.A.SFHGI.    | 163 |
| ABB84872 | 53  | T.....S..SF.Q.KF.NVPC-.VYFPRKGTME.H...AS.DV.G.SSHGI.     | 106 |
| ABM05446 | 110 | T.Y..N...N.RN..QRKF.NSP.-.VHFPRKSTME...PS.DV.A.SFHG..    | 163 |
| ABM05463 | 110 | T.Y..N...N.RD..QRKF.NSP.-.YFPRKSTME...PS.DV.A.SFHGI.     | 163 |
| AAT36593 | 134 | T.Y..N...K..RN..QRKF.NSP-N.VYFPRKSTME...SS.NV.A.SFCG..   | 187 |
| ABI78857 | 123 | T...K...N..NF.QRKF.NVP.-.VYFPRNGPKE.H...SG.EV.G.LA.G..   | 176 |
| ABM05477 | 110 | T...N...N..RN..QRKS.NSP.-.VYFPRKSSME...PS.DV.A.SFHG..    | 163 |
| ABM05475 | 103 | T.Y..N...N.RD..QRKF.NSP.-.VYFPRKSTME...PS.DV.A.SFHG..    | 156 |
| ABK59276 | 88  | T...IN...N..N.VQRKF.NFX.E.-.YFPRNGAME.H...SS.EV.G.SF.GX. | 141 |
| AAV90772 | 140 | T...K...Q..RA.VQ.KL.NSPC-.IFFPRQGP.E.H...S.DV.G.SSHG..   | 193 |
| AAV90798 | 140 | T...N...N..NA.Q.KF.NGP-Y.SCFPKKGTME.C...SS.S.TPSFHG..    | 193 |
| ABI78906 | 123 | T...K...N..NF.QRKF.NVP.-.VYFPRNGPME.H...SG.EV.G.LA.G..   | 176 |
| ABB84906 | 53  | T.....N..SF.QRKF.NVPC-.VYFPRKGTME.H...TS.DV.E.SSNGI.     | 106 |
| ABM05451 | 110 | T.Y..N...N.RN..QRKF.NSP.-.VYFPRKSTKE...PS.DV.A.SFHG..    | 163 |
| AAT36597 | 134 | T.Y..N...N..RN..QRKS.NSP-N.VYFPRKSTXE...PN.NV.A.SF.G..   | 187 |
| ABR28274 | 18  | T...IN...S..N.VQRKF.NFPCE.-.YFPRNGAME.K...ST.EV.G.SFXG.. | 71  |
| ABI78868 | 124 | ...K...N..NF.QRKF.NVP.-.VYFPRNGPME.H...AD.EV.G.LA.G..    | 176 |
| ABU43520 | 130 | T.....N..S.V.RRF.NAPC-.IYFPRKGTME.H...MSXD.V.G.SSHGI.    | 183 |
| ABS52660 | 87  | T...N.X.S..N..QRKF.NIPC-.VYFPRKGAME.H...TS.DV.G.SSHGI.   | 140 |
| AAT36595 | 134 | T.Y..N...N..RN..QRKS.NSP-N.VYFPRKSTTE...PN.NV.A.SF.G..   | 187 |
| AAT36596 | 134 | T.Y..N...N..RN..QRKS.NSP-N.VYFPRKSTAE...PN.NV.A.SF.G..   | 187 |
| ABK59269 | 89  | T...IN...X..N.VQRKF.NLPCE.-.YFPRNGTXE.H...SS.EX.G.SF.G.. | 142 |
| ABM05479 | 110 | T...N...N..RN..QRKS.NSP.-.VYFPRKSSME...PS.DV.A.SFHG..    | 163 |
| AAV90757 | 134 | T.Y..N...N..RN..QRKF.NSP.-.VY.PMKNTME...PS.D..A.SFCG..   | 187 |
| ABI78869 | 123 | T...K...N..NF.QRKF.NVP.-.VYFPRKYPME.H...SG.EV.G.LA.G..   | 176 |
| ABU43543 | 130 | T...N...N..S.VQRKF.SVPC-.VYFPRKGTME.H...TR.DX.G.SSCGI.   | 183 |
| ABM05478 | 110 | T...N...N..RN..QRKS.NSP.-.VYFPRKSSME...PS.DV.A.SFHG..    | 163 |
| ABB84879 | 53  | T.....S..SF.QRKF.NVPC-.VYFPRKGTME.Y...TS.DV.G.SSHGI.     | 106 |
| ABK59297 | 88  | T...IN...N..N.VQRKF.SFXCE.-.YFPRNGTXE.H...SS.XV.GPSF.G.. | 141 |
| ABB84878 | 53  | T.....S..SF.QRKF.NVPC-.VYFPRKGTME.Y...TS.DV.G.SSHGI.     | 106 |
| ABB84880 | 53  | T.....S..SF.QRKF.NVPC-.VYFPRKGTME.Y...TS.DV.G.SSHGI.     | 106 |
| ABB84896 | 53  | T.....S..SF.QRKF.NVPC-.VYFSRKGTE.H...TS.DV.G.SSHGI.      | 106 |
| ABB84868 | 53  | T.....S..SF.QRKF.NVPC-.VYFPRKGTME.Q...AS.DV.G.SPQGI.     | 106 |
| AAT36598 | 116 | T.Y..N...N..RN..QRKS.NSP-N.VYFPRKSTTE...PN.NV.A.SFHG..   | 169 |
| ABI78914 | 123 | T...K...N..KF.QXKF.NVP.-.YFPRNGSME.H...SG.EV.G.SA.G..    | 176 |
| ABI78926 | 121 | T...K...N..NFVQRKF.NVP.-.VYFPRNDPRE.H...SG.EV.G.LA.G..   | 174 |
| ABI78864 | 55  | T...XK...N..NF.QRKF.NVP.-.VYFPRNGPME.H...SG.EV.G.ST.G..  | 108 |
| ABB84874 | 53  | T.....S..SF.QRKF.NVPC-.VYFPRKGTMK.H...TS.DV.G.SSHGI.     | 106 |
| ABI78865 | 93  | T...K...N..NF.Q.KF.NVP.-.VYFPRNGPME.H...SG.EV.G.SA.G..   | 146 |
| ABB84903 | 54  | .....S..SF.QRKF.NVPC-.VYFPRKGTME.H...TS.DV.G.SSHGI.      | 106 |

|          |     |                                                          |     |
|----------|-----|----------------------------------------------------------|-----|
| AAV90799 | 140 | T...N..EN..N..O.KF.NAPC-.SYF.KKGAME.H...SV.NV.IPSFYG..   | 193 |
| ABK59312 | 88  | T...IN...N..N.VQRKF.NLPCE.-YFPRNGTTE.H...SX.XX.G.SF.G..  | 141 |
| ABB84869 | 53  | T.....S..SF.QRKFTSVPC-.VYFPRKGTME.H...SS.DV.G.SSHGI..    | 106 |
| ABB84871 | 53  | T.....S..SF.QRKFNVPCL.SYFPRKGTME.H...TS.DV.G.SSHGI..     | 106 |
| ABM05476 | 80  | T.Y..N...N.RD..QRKF.NSP.-.VYFPRKSTME.....PS.DV.A.SFHG..  | 133 |
| AAV90767 | 140 | T...K...Q...VE.KL.NSP-Y.IFFPRKSPME.QL..SS.EV.G.SP.G..    | 193 |
| AAV90779 | 125 | T...K...A..A.VQ.KL.NSPC-.IFFPRKDP.E.Q...R.DV.G.SSHG..    | 178 |
| AAV90774 | 140 | T...K...Q...VQ.KLNNSPC-..FFPMKGP.E.H..A.S.VV.G.SSHG..    | 193 |
| ABB84873 | 53  | T.Y.....S..SF.Q.KF.NVPC-.VYFPRKGTME.H...TS.DV.G.SSHGI..  | 106 |
| ABM05473 | 110 | T.Y..N...N.RD..QRKF.NSP.-.VYFPRKSTME.....PS.DV.A.SFCGI.. | 163 |
| ABB84904 | 53  | T.....S..SF.QRKFNVPCL.VYFPRKGTME.H...TS.DV.G.SSHGI..     | 106 |
| ABR28254 | 18  | T...I...N..N.VQRKF.NSPGE.-FFPMNGSME.H...AS.XV.A.SF.G..   | 71  |
| ABD49423 | 117 | T...K...Q...VQ.KLNNSPC-..FFPRKSL.E.H...PS.DV.GASFHG..    | 170 |
| ABK59317 | 88  | T...IN...N..N.VQRKF.NFP-X.XYFPSNGXME.X...SS.EV.G.SFHG..  | 141 |
| ABD49422 | 117 | T...K...Q...VQ.KLNNSPC-..FFPRKSL.E.H...PS.DV.GASFHG..    | 170 |
| ABI78929 | 123 | T...K...N..NF.QRKFXNVP-.VYFPRNGAME.H..TSG.EV.G.LACG..    | 176 |
| ABM05452 | 110 | T.Y..N...N.RN..QRKF.NFP.-.VYFPRKSTMK.....PS.NV.A.SFHG..  | 163 |
| ABR28252 | 18  | T.R.IN...N..N.VQRKF.NFPCE.-HFPRNGPME.Q...AS..V.G.SFHG..  | 71  |
| ABI78872 | 123 | T...K...N..IF.Q.KF.NVP-X.VYFPRNGPKE.H...SG.EV.G.SA.G..   | 176 |
| ABD49430 | 121 | T...K...Q...VQ.KLNNSPC-..FFPRKSL.E.H...PS.DV.GASFHG..    | 174 |
| ABD49429 | 121 | T...K...Q...VQ.KLNNSPC-..FFPRKSL.E.H...PS.DV.GASFHG..    | 174 |
| AAT36588 | 128 | T.Y..N...N.RN..QGKS.NSP-N.VYFPRKSTIE.....PS.NV.T.SF.G..  | 181 |
| ABI78905 | 123 | T...K...QN..NF.HRKFNVP.-.VYFPRNGPME.H...SG.EV.G.LA.G..   | 175 |
| ABB84905 | 53  | T.....S..SF.QRKFNVPCL.VYFPRKGTME.....TS.DV.G.SSHGI..     | 106 |
| AAT36590 | 122 | T.Y..N...N.RN..QGKS.NSP-N.VYFPRKSTIE.....PS.NV.T.SF.G..  | 175 |
| AAT36602 | 134 | T.Y..N...N.RN..QRKS.NSP-N.VYFPRKSITE.....PN.NV.T.SFHG..  | 187 |
| AAT36589 | 134 | T.Y..N...N.RN..QGKS.NSP-N.VYFPRKSTIE.....PS.NV.T.SF.G..  | 187 |
| ABD49414 | 121 | T...K...Q...VQ.KLNNSPC-..FFPRKSL.E.H...PS.DV.GASFHG..    | 174 |
| ABR28253 | 18  | T...IN..RN..N.VQRKF.NFPCE.-HFPRYGPME.Q...SS.EV.G.SFHG..  | 71  |
| ABD49426 | 121 | T...K...Q...VQ.KLNNSPC-..FFPRKSL.E.H...PS.DV.GASFHG..    | 174 |
| ABD49428 | 121 | T...K...Q...VQ.KLNNSPC-..FFPRKSL.E.H...PN.DV.GASFHG..    | 174 |
| ABB84897 | 53  | T.....S..SF.QRKFNVPCL.VYFPRKGTME.H...TS.DV.G.SSHGI..     | 106 |
| AAT36601 | 134 | T.Y..N...N.RN..QRKS.NSP-N.VYFPRKSITE.....PN.NV.T.SFHGI.. | 187 |
| ABB84870 | 53  | T.....S..SF.QRKFNAPC-.VYFPRKDTMQ.N...TS.DV.G.SSHGI..     | 106 |
| ABD49420 | 121 | T...K...Q...I.VQ.KLNNSPC-..FFPRKSL.E.H...PS.DV.GASFHG..  | 174 |
| ABI78920 | 123 | T...K...N..NF.QRKFNVPCL.VYF.RKGPQE.S...SN.EV.G.SALG..    | 176 |
| ABB84867 | 53  | T.....S..SF.QRKFNVPCL.VYFPRKGTRE.H...AS.DV.G.SPHGI..     | 106 |
| ABB84865 | 54  | T.....S..SF.QRKFNVPCL.VYFPRKGIME.H...AR.DV.G.SSHGI..     | 106 |
| AAV90775 | 140 | T...K...Q...A.Q.KL.NSPC-.FFPRKGL.E.N...S.DV.G.SSHG..     | 193 |
| ABD49415 | 121 | T...K...Q...I.VQ.KLNNSPC-..FFPRKSP.E.H...PN.DV..ASF.G..  | 174 |
| AAT36603 | 134 | T.Y..N...N.RN..QMKS.NSP-N.VYFPRKSTTE.....PN.NV.A.SF.G..  | 187 |
| ABD49427 | 121 | T...K...Q...VQ.KLNNSPC-..FFQRKSP.E.H...SS.DV.G.SL.G..    | 174 |
| ABD36599 | 134 | T.Y..N...N.RN..QMKS.NSP-N.VYFPRKSTTE.....PN.NV.A.SF.G..  | 187 |
| ABI78904 | 123 | T...K...QN..NF.XRKFNVP.-.VYFPRNGPME.H...SG.EV.G.LA.G..   | 176 |
| AAT36600 | 134 | T.Y..N...N.RN..QRKS.NSP-N.VYFPRKSITE.....PN.NV.T.SLHGI.. | 187 |
| ABM05458 | 94  | T.Y..N...N.RD..QRKF.NSP.-.VYFPRKSTME.....PS.DV.A.SFHG..  | 147 |
| ABD49416 | 121 | T...K...Q...VQ.KLNNSPC-..LFPRKSL.E.H...PS.DV.ASFHG..     | 174 |
| ABD49418 | 121 | T.V...K...Q...VQ.KLNNFPC-..FFPRKSL.E.H...PS.DV.GSSFHG..  | 174 |
| ABO28363 | 110 | T.Y..N...N.RN..QRKS.NSP-N.VYFPRKSTAE.....PN.NV.A.SF.G..  | 163 |
| ABD49417 | 121 | T...K...Q...VQ.KLNNFPC-..FFPKSL.E.H...PS.DV.GASFHG..     | 174 |
| ABO28362 | 110 | T.Y..N...N.RN..QRKS.NSP-N.VYFPRKSTAE.....PN.NV.A.SF.G..  | 163 |
| ABO28360 | 110 | T.Y..N...N.RN..QRKS.NSP-N.VYFPRKSTAE.....PN.NV.A.SF.G..  | 163 |
| ABB84885 | 53  | T.....S..RCF.QRKFNVPCL.VYFPRKGTME.H...TS.DV.G.SSYGI..    | 106 |
| AAV90791 | 139 | T...N...N..N..QRKV.NAP-H.ALLOQKDT.E.H...SS.DV.GISFCGI..  | 192 |
| ABM05444 | 110 | T.Y..N...N.RN..XRKF.NSP.-.VHFXRKSXME.....PS.DV.A.SFHG..  | 163 |
| ABU44956 | 118 | T...K...Q...VQ.KLNNSPC-..FFSRKSP.E.N...SS.DV.GASLHG..    | 171 |

|          |     |             |                  |            |                    |     |
|----------|-----|-------------|------------------|------------|--------------------|-----|
| ABD49425 | 121 | TV...K...Q  | ...VQ.KLNNFPC--  | FFPRKSL.E  | H...PS.DV.GASFHGM. | 174 |
| ABD49424 | 121 | TV...K...Q  | ...VQ.KLNNFPC--  | FFPRKSL.E  | H...PS.DV.GASFHGM. | 174 |
| ABD49421 | 121 | T...K...Q   | ...VQ.KLNNSPC--  | FLPRKSP.E  | H...XS.DV.ASFHG..  | 174 |
| ABO28361 | 105 | T.Y..N...N  | RN..QRKS.NSP-N.V | YFPRKSTAE  | ...PN.NV.A.SF.G..  | 158 |
| ABD49433 | 121 | T...K...Q   | ...VQ.KLNNSPC--  | FLPRKSP.E  | H...PS.DV..ASFHG.. | 174 |
| AAT36607 | 114 | T.Y..N...N  | RN..RKFCRSP.-V   | CFPSKSTMD  | ...SS.D..A.SFHG..  | 167 |
| ABO28359 | 105 | T.Y..N...N  | RN..QRKS.NSP-N.V | YFPRKSTAE  | ...PN.NV.A.SF.G..  | 158 |
| ABU44957 | 118 | T...K...Q   | ...VQ.KLNNSPC--  | FFSRKSP.E  | N...SS.DV.GASIHG.. | 171 |
| ABO28358 | 100 | T.Y..N...N  | RN..QRKS.NSP-N.V | YFPRKSTAE  | ...PN.NV.A.SF.G..  | 153 |
| ABU44947 | 116 | T...K...Q   | ...VQ.KLNNSPC--  | FFSRKSP.E  | N...SS.DV.GASLQG.. | 169 |
| AAT36609 | 134 | T.Y..N...N  | RN..RKFCRSP.-V   | CFPSKSTMD  | ...SS.D..A.SFHG..  | 187 |
| ABD49432 | 121 | T...K...Q   | ...VQ.KLNNXC--   | FLPRKSP.E  | H...PS.DV..ASF.G.. | 174 |
| ABU44885 | 118 | T...K...Q   | ...VQ.KLNNSPC--  | FFSRKSP.E  | N...SS.DV.GASLQG.. | 171 |
| ABU44953 | 116 | T...K...Q   | ...VQ.KLNNSPC--  | FFSRKSP.E  | N...SS.DV.GASLQG.. | 169 |
| AAV90789 | 139 | T.....N     | .K..QRKV.NAP-H.A | AHL.EKDP.E | Q...TS.D.V.SF.G..  | 192 |
| ABU44949 | 116 | T...K...Q   | ...VQ.KLNNSPC--  | FFSRKSP.E  | N...SS.DV.GASLQG.. | 169 |
| ABU44951 | 116 | T...K...Q   | ...VQ.KLNNSPC--  | FFSRKSP.E  | N...SS.DV.GASLQG.. | 169 |
| ABU44883 | 118 | T...K...Q   | ...VQ.KLNNSPC--  | FFSRKSP.E  | N...SS.DV.GASLQG.. | 171 |
| ABU44903 | 118 | T...K...Q   | ...VQ.KLNNSPC--  | FFSRKSP.E  | N...SS.DV.GASLQG.. | 171 |
| ABU44919 | 118 | T...K...Q   | ...VQ.KLNNSPC--  | FFSRKSP.E  | N...SS.DV.GASLQG.. | 171 |
| ABU44904 | 118 | T...K...Q   | ...VQ.KLNNSPC--  | FFSRKSP.E  | N...SS.DV.GASLQG.. | 171 |
| ABU44908 | 118 | T...K...Q   | ...VQ.KLNNSPC--  | FFSRKSP.E  | N...SS.DV.GASLQG.. | 171 |
| ABU44921 | 118 | T...K...Q   | ...VQ.KLNNSPC--  | FFSRKSP.E  | N...SS.DV.GASLQG.. | 171 |
| ABU44959 | 118 | T...K...Q   | ...VQ.KLNNSPC--  | FFSRKSP.E  | N...SS.DV.GASLHG.. | 171 |
| ABU44881 | 118 | T...K...Q   | ...VQ.KLNNSPC--  | FFSRKSP.E  | N...SS.DV.GASLQG.. | 171 |
| ABU44879 | 118 | T...K...Q   | ...VQ.KLNNSPC--  | FFSRKSP.E  | N...SS.DV.GASLQG.. | 171 |
| ABU44960 | 118 | T...K...Q   | ...VQ.KLNNSPC--  | FFSRKSP.E  | N...PS.DV.GASLHG.. | 171 |
| ABU44920 | 118 | T...K...Q   | ...VQ.KLNNSPC--  | FFSRKSP.E  | N...SS.DV.GASLQG.. | 171 |
| ABU44878 | 118 | T...K...Q   | ...VQ.KLNNSPC--  | FFSRKSP.E  | N...SS.DV.GASLQG.. | 171 |
| ABU44946 | 118 | T...K...Q   | ...VQ.KLNNSPC--  | FFSRKSP.E  | N...SS.DV.GASLQG.. | 171 |
| ABU44955 | 118 | T...K...Q   | ...VQ.KLNNSPC--  | FFSRKSP.E  | N...SS.DV.GASLHG.. | 171 |
| AAV90792 | 139 | TT.....N    | .K..QRKV.NAP-H.A | AHL.EKDP.E | H...TS.DV.V.SF.G.. | 192 |
| ABU44906 | 118 | T...K...Q   | ...VQ.KLNNSPC--  | FFSRKSP.E  | N...SS.DV.GASLQG.. | 171 |
| ABU44942 | 118 | T...K...Q   | ...VQ.KLNNSPC--  | FFSRKSP.E  | N...SS.DV.GASLQG.. | 171 |
| ABU44884 | 118 | T...K...Q   | ...VQ.KLNNSPC--  | FFSRKSP.E  | N...SS.DV.GASLQG.. | 171 |
| ABD49419 | 121 | T...K...Q   | ...VQ.KLNNFPC--  | FFPKKSL.Q  | H...PS.DV.GASFHG.. | 174 |
| ABU44888 | 118 | T...K...Q   | ...VQ.KLNNSPC--  | FFSRKSP.E  | N...SS.DV.GASLQG.. | 171 |
| ABU44899 | 118 | T...K...Q   | ...VQ.KLNNSPC--  | FFSRKSP.E  | N...SS.DV.GASLQG.. | 171 |
| ABU44891 | 118 | T...K...Q   | ...VQ.KLNNSPC--  | FFSRKSP.E  | N...SS.DV.GASLQG.. | 171 |
| ABU44913 | 118 | T...K...Q   | ...VQ.KLNNSPC--  | FFSRKSP.E  | N...SS.DV.GASLQG.. | 171 |
| ABU44890 | 118 | T...K...Q   | ...VQ.KLNNSPC--  | FFSRKSP.E  | N...SS.DV.GASLQG.. | 171 |
| ABU44915 | 118 | T...K...Q   | ...VQ.KLNNSPC--  | FFSRKSP.E  | N...SS.DV.GASLQG.. | 171 |
| ABU44897 | 118 | T...K...Q   | ...VQ.KLNNSPC--  | FFSRKSP.E  | N...SS.DV.GASLQG.. | 171 |
| ABU44892 | 118 | T...K...Q   | ...VQ.KLNNSPC--  | FFSRKSP.E  | N...SS.DV.GASLQG.. | 171 |
| ABU44905 | 118 | T...K...Q   | ...VQ.KLNNSPC--  | FFSRKSP.E  | N...SS.DV.GASLQG.. | 171 |
| ABU44916 | 118 | T...K...Q   | ...VQ.KLNNSPC--  | FFSRKSP.E  | N...SS.DV.GASLQG.. | 171 |
| ABU44896 | 118 | T...K...Q   | ...VQ.KLNNSPC--  | FFSRKSP.E  | N...SS.DV.GASLQG.. | 171 |
| ABU44935 | 118 | T...K...Q   | ...VQ.KLNNSPC--  | FFSRKSP.E  | N...SS.DV.GASLQG.. | 171 |
| ABU44950 | 102 | T...K...Q   | ...VQ.KLNNSPC--  | FFSRKSP.E  | N...SS.DV.GASLQG.. | 155 |
| ABU44898 | 118 | T...K...Q   | ...VQ.KLNNSPC--  | FFSRKSP.E  | N...SS.DV.GASLQG.. | 171 |
| ABU44929 | 118 | T...K...Q   | ...VQ.KLNNSPC--  | FFSRKSP.E  | N...SS.DV.GASLQG.. | 171 |
| ABM05469 | 76  | T.Y..X...XN | RD..QRKF.NSP.-V  | YFPRKSTME  | ...PX.DV.A.SF.GI.  | 129 |
| ABU44925 | 95  | T...K...Q   | ...VQ.KLNNSPC--  | FFSRKSP.E  | N...SS.DV.GASLQG.. | 148 |
| ABU44962 | 118 | T...K...Q   | ...VQ.KLNNSPC--  | LFSRKSP.E  | N...SS.DV.GASLHG.. | 171 |
| ABU44900 | 118 | T...K...Q   | ...XQ.KLNNSPC--  | FFSRKSP.E  | N...SS.DV.GASLQG.. | 171 |
| ABU44927 | 108 | T...K...Q   | ...VQ.KLNNSPC--  | FFSRKSP.E  | N...SS.DV.GASLQG.. | 161 |

|          |     |                                                          |     |
|----------|-----|----------------------------------------------------------|-----|
| ABU44952 | 86  | T...K...Q...VQ.KLNNSPC--..FFSRKSP.E.N...SS.DV.GASLQG..   | 139 |
| ABU44880 | 118 | T...K...Q...VQ.KLNNSPC--..FFSRKSP.E.N...SS.DV.XASLQG..   | 171 |
| AAV90790 | 136 | T...IY...P...N..QRK..NAP-HKVPLPGRDA.E.H...SI.DV.G.SSHG.. | 189 |
| ABU44914 | 118 | T...K...Q...VQ.KLNNSPC--..XFSRKSP.E.N...SI.DV.GASLQG..   | 171 |
| ABU44902 | 118 | T...K...Q...XQ.KLNNSPC--..FFSRKSP.E.N...SS.DV.GASLQG..   | 171 |
| ABU44893 | 118 | T...K...Q...VQ.KLNNSPC--..FFSRKSP.E.N...SS.DV.GAXLQG..   | 171 |
| ABM05459 | 110 | T.Y..N...N.RD..QRKF.NSP.-.VYFPRKSTME.....PS.DV.          | 155 |
| ABU44938 | 85  | T...K...Q...VQ.KLNNSPC--..FFSRKSP.E.N...SS.DV.GASLQG..   | 138 |
| ABM05456 | 110 | T.Y..N...N.RN..QRKF.NSP.-.VYFPRKSTME.....PS.NV.          | 155 |
| ABU44886 | 85  | T...K...Q...VQ.KLNNSPC--..FFSRKSP.E.N...SS.DV.GASLQG..   | 138 |
| ABU44918 | 77  | T...K...Q...VQ.KLNNSPC--..FFSRKSP.E.N...SS.DV.GASLQG..   | 130 |
| ABU44944 | 118 | T...K...Q...VQ.KLNNSPC--..FFSRKSP.E.N...SS.DV.GASLQG..   | 171 |
| ABU44930 | 118 | T...K...Q...VQ.KLNNSPC--..FFSRKSP.E.N...SS.NV.GASLQG..   | 171 |
| ABU44928 | 76  | T...K...Q...VQ.KLNNSPC--..FFSRKSP.E.N...SS.DV.GASLQG..   | 129 |
| ABU44961 | 118 | T...K...Q...VQ.KLNNSPC--..FFSXKSP.E.N...SS.DV.GASL.G..   | 171 |
| ABU44963 | 114 | T...K...Q...VQ.KLNNSPC-.TFYPRKSPIE.H...SS.DV.GASLCG..    | 167 |
| ABU44945 | 118 | T...K...Q...VQ.KLNNSPC--..FFSRKSP.E.N...SS.XV.GASLQG..   | 171 |
| ABU44934 | 118 | T...K...Q...VQ.KLNNSPC--..FFSRKSP.E.N...SS.GV.GASLQG..   | 171 |
| ABU44958 | 103 | T...K...Q...AVQ.KLNNSPC--..FFSRKSP.E.N...SS.DV.GASLHG..  | 156 |
| ABM05457 | 110 | T.Y..N...N.RD..QRKF.NSP.-.VYFPRKSTME.....PS.DV.          | 155 |
| AAT36606 | 134 | T.Y..N...N.XD..HRKFCRSP.-.VCFPNKSIMD.....SS.H..A.SFHG..  | 187 |
| AAT36605 | 134 | T.Y..N...N.RD..RKFCRSP.-.VCFPSKSIMD.....SS.H..A.SFHG..   | 187 |
| ABM05445 | 110 | T.Y..N...N.RN..QRKF.NSP.-.VHFPRKSTME.....PS.DV.          | 155 |
| AAT36604 | 134 | T.Y..N...N.RD..RKFCRSP.-.VCFPSKSIMD.....SS.H..A.SFHG..   | 187 |
| ABK59319 | 85  | T..IN...N..N.VORKFN---QGKKYFPRNGSME.H.P.SS.EGWGXS.F.G..  | 136 |
| ABM05461 | 110 | T.Y..N...N.RN..Q.KT.NSP.-.VYFPRKSTME.....PS.DV.          | 155 |
| ABM05454 | 110 | T.Y..N...N.RN..QRKF.NFP.-.VYFPRKSTMK.....PS.NV.          | 155 |
| ABM05472 | 110 | T.Y..N...N.RD..QRKF.NSP.-.VYFPRKSTME.....PX.XV.          | 155 |
| ABI78913 | 121 | T...IK...N..NF.HTKF.NDP.-.VYFPRIPIHXH...SG.EX.X.LPHKM.   | 174 |
| ABI78890 | 123 | T...K.X.N..NF.QRXXXNVP.-.VYFPRNGPME.HX..                 | 162 |

Database: All non-redundant GenBank CDS translations+PDB+SwissProt+PIR+PRF exclu  
environmental samples from WGS projects

Posted date: Jan 24, 2008 5:51 PM

Number of letters in database: 2,024,981,677

Number of sequences in database: 5,872,341

Lambda K H  
0.328 0.139 0.522

Gapped  
Lambda K H  
0.267 0.0594 0.140

Matrix: BLOSUM62

Gap Penalties: Existence: 11, Extension: 1

Number of Sequences: 5872341

Number of Hits to DB: 31550355

Number of extensions: 1618417

Number of successful extensions: 3976

Number of sequences better than 100: 3

Number of HSP's better than 100 without gapping: 0

Number of HSP's gapped: 3975

Number of HSP's successfully gapped: 3





|          |     |            |                           |                    |     |
|----------|-----|------------|---------------------------|--------------------|-----|
| ABF22642 | 134 | T....Q...N | .SI.HRKF.NTPC-.VYFPRNSMME | Q...SN.DV.H.TS.G.. | 187 |
| AAP03687 | 135 | T....R...N | .SI.HRKF.NTPC-.VYFPRNSTME | Q...PN.DV.H.TS.G.. | 188 |
| AAR16358 | 135 | T....Q...N | .SI.HRKF.NTLC-.VYFPRNSTME | Q...PN.DV.H.TR.G.. | 188 |
| AAR16403 | 135 | T....Q...N | .SI.HRKF.NTLC-.VYFPRNSTME | Q...PN.DV.H.TR.G.. | 188 |
| AAL18131 | 135 | T....Q...N | .SI.HRKF.NTLC-.VYFPRNSTME | Q...PN.DV.H.TR.G.. | 188 |
| AAR16339 | 135 | T....R...N | .SI.HRKF.NTLC-.VYFPRNSTME | Q...PN.DV.H.TR.G.. | 188 |
| AAP83904 | 135 | T....R...N | .SI.HRKF.NTLC-.VYFPRNSTME | Q...PN.DV.H.TR.G.. | 188 |
| AAL18114 | 135 | T....R...N | .SI.HRKF.NTLC-.VYFPRNSTME | Q...PN.DV.H.TR.G.. | 188 |
| AAR16368 | 135 | T....R...N | .SI.HRKF.NTLC-.VYFPRNSTME | Q...PN.DV.H.TR.G.. | 188 |
| AAP83900 | 135 | T....R...N | .SI.HRKF.NTLC-.VYFPRNSTME | Q...PN.DV.H.AR.G.. | 188 |
| AAL18136 | 135 | T....R...N | .SI.HRKF.NTLC-.VYFPRNSTME | Q...PN.DV.H.TR.G.. | 188 |
| ABA29174 | 90  | T....R...N | .SI.HRKF.NTPC-.VYFPRNSTME | Q...PN.DV.HATS.G.. | 143 |
| AAR16405 | 135 | T....Q...N | .SI.HRKF.NTLC-.VYFPRNSTME | Q...PS.DV.H.TR.G.. | 188 |
| AAR16362 | 135 | T....K...N | .SI.HRKF.NTLC-.VYFPRNSTME | Q...PN.DV.H.TR.G.. | 188 |
| AAR16396 | 135 | T....Q...N | .SI.HRKF.NTLC-.VYFPRNSTME | Q...PN.DV.H.TR.G.. | 188 |
| ABF22623 | 135 | T....R...N | .SI.HRKF.NAPC-.VYFPRNSTME | Q...PN.DV.HATS.G.. | 188 |
| AAR16351 | 135 | T....Q...N | .SI.HRKF.NTLC-.VYFPRNSTME | Q...PN.DV.H.AR.G.. | 188 |
| ABN80933 | 136 | ....R...N  | .SI.HRKF.NTPC-.VYFPRNSTME | Q...PN.DV.H.SS.G.. | 188 |
| AAZ20250 | 135 | T....R...N | .SI.HRKF.NTLC-.VYFPRNSTME | Q...PN.DV.H.TR.G.. | 188 |
| AAL18115 | 135 | T....R...N | .SI.HRKF.NTLC-.VYFPRNSTME | Q...PN.DV.H.TR.G.. | 188 |
| AAR16401 | 135 | T....R...N | .SI.HRKF.NTLC-.VYFPRNSTME | Q...PN.DV.H.TR.G.. | 188 |
| AAL18133 | 135 | T....R...N | .SI.HRKF.NTLC-.VYFPRNSTME | Q...PN.DV.H.TR.G.. | 188 |
| AAR16341 | 135 | T....R...N | .SI.HRKF.NTLC-.VYFPRNSTME | Q...PN.DV.HPTR.G.. | 188 |
| AAR16359 | 135 | T....Q...N | .I.HRKF.NTLC-.VYFPRNSTME  | Q...PN.DV.H.TR.G.. | 188 |
| ABD24383 | 135 | T....Q...N | .SI.HRKF.NTLC-.VYFPRNSTME | Q...PN.DV.H.TR.G.. | 188 |
| AAP03663 | 135 | T....R...N | .SI.HRKF.NAPC-.VYFPRNSTME | Q...PD.DV.H.TS.G.. | 188 |
| AAR16385 | 135 | T....Q...N | .SI.HRKF.NTLC-.VYFPRNSTME | Q...PN.DV.H.TR.G.. | 188 |
| AAR16370 | 135 | T....Q...N | .SI.HRKF.NTLC-.VYFPRNSTME | Q...PN.DV.H.TR.G.. | 188 |
| AAR16346 | 135 | T....Q...N | .SI.HRKF.NTPC-.VYFPRNSTME | H...SN.DV.C.TS.G.. | 188 |
| AAQ76054 | 135 | T....R...N | .SI.HRKF.NTLC-.VYFPRNSTME | Q...PN.DV.H.TR.G.. | 188 |
| ABC84850 | 135 | T....R...N | .SI.HRKF.NTPC-.VYFPRNSTME | Q...PN.DV.H.TS.G.. | 188 |
| AAR16348 | 135 | T....Q...N | .SI.HRKF.NTLC-.VYFPRNSTME | Q...PN.DV.H.TR.G.. | 188 |
| AAL18113 | 135 | T....R...N | .SI.HRKF.NTPC-.VYFPRNSAME | Q...PN.DV.H.TROG.. | 188 |
| AAL18099 | 135 | T....Q...N | .SI.HRKF.NTLC-.VYFPRNSTME | Q...PN.DV.H.TR.G.. | 188 |
| AAL18152 | 135 | T....Q...N | .SI.HRKF.NTLC-.VYFPRNSTME | Q...PN.DV.H.TR.G.. | 188 |
| AAP83908 | 135 | T....R...N | .SI.HRKF.NTLC-.VYFPRNSTME | H...PN.DV.H.PR.G.. | 188 |
| ABF22618 | 135 | T....R...N | .SI.HRKF.NTPC-.VYFPRNSTME | Q...PD.DV.H.AS.GI. | 188 |
| AAL18102 | 135 | T....R...N | .SI.HRKF.NTLC-.VYFPRNSTME | Q...PN.DV.H.TR.G.. | 188 |
| AAP03654 | 135 | T....R...N | .SI.HRKF.NTPC-.VYFPRNSTME | Q...PN.DV.HNTS.G.. | 188 |
| ABC84849 | 135 | T....R...N | .SI.HRKF.NTPC-.VYFPRNSTME | Q...PN.DV.H.TS.G.. | 188 |
| AAL18107 | 135 | T....R...N | .SI.HRKF.NTLC-.VYFPRNSTME | Q...PN.DV.H.TR.GI. | 188 |
| AAP03666 | 135 | T....R...N | .SI.HRKF.NAPC-.VYFPRNSXME | Q...PN.DV.H.TS.G.. | 188 |
| ABD24380 | 135 | T....Q...N | .SI.HRKF.NTLC-.VYFPRNSTME | Q...PN.DV.H.TR.G.. | 188 |
| AAP83910 | 135 | T....Q...N | .SI.HRKF.NTPC-.VYFPRNSTME | Q...QN.DV.H.TS.G.. | 188 |
| AAR16391 | 133 | T....R...N | .SI.HRKF.NTLC-.VYFPRNSTME | Q...PN.DV.H.TR.GI. | 186 |
| AAL18117 | 135 | T....Q...N | .SI.HRKF.NTLC-.VYFPRNSTME | Q...PN.DV.H.TR.G.. | 188 |
| AAL18157 | 135 | T....Q...N | .SI.HRKF.NTLC-.VYFPRNSTME | Q...PN.DV.H.TR.G.. | 188 |
| ABN50162 | 92  | T....R...N | .SI.HRKF.NTPC-.VYFPRNSTME | Q...PN.DV.H.TT.G.. | 145 |
| AAP03658 | 135 | T....R...N | .SI.HRKF.NTPC-.VYFPRNSAME | Q...PD.DV.H.SS.G.. | 188 |
| AAL18126 | 135 | T....R...N | .SI.HRKF.NTLC-.VYFPRNSTME | Q...PN.DV.H.SR.GI. | 188 |
| ABF01030 | 135 | T....Q...N | .SI.HSKF.NTPC-.VYFPRNSTME | Q...PN.DV.H.TR.G.. | 188 |
| ABF01031 | 135 | T....Q...N | .SI.HSKF.NTPC-.VYFPRNSTME | Q...PN.DV.H.TR.G.. | 188 |
| ABF01034 | 135 | T....Q...N | .SI.HSKF.NTPC-.VYFPRNSTME | Q...PN.DV.H.TR.G.. | 188 |
| ABF01028 | 135 | T....Q...N | .SI.HSKF.NTPC-.VYFPRNSTME | Q...PN.DV.H.TR.G.. | 188 |
| AAR16376 | 135 | T....Q...N | .SI.HRKF.NTRC-.VYFPRNSTME | Q...PN.DV.H.TR.G.. | 188 |
| ABN50182 | 92  | T....R...N | .SI.HRKF.NTPC-.VYFPRNSTME | Q...PD.DV.H.TS.G.. | 145 |
| AAP83919 | 135 | T....R...N | .SI.HRKF.NTLC-.VYFPRNSTME | Q...PN.DV.H.TROG.. | 188 |
| AAL18098 | 136 | T....Q...N | .SI.HRKF.NTLC-.VYFPRNSTME | Q...PN.DV.H.TR.G.. | 189 |
| AAZ93924 | 92  | T....R...N | .SI.HRKF.NTPC-.VYFPRNSTME | Q...PD.DV.H.TS.G.. | 145 |
| ABN80932 | 136 | ....R...N  | .SI.HRKF.NTPC-.VYFPRNSTME | Q...PN.DV.H.TS.G.. | 188 |
| AAR16375 | 135 | T....Q...N | .SI.HRKF.NTRC-.VYFPRNSTME | Q...PN.DV.H.TR.G.. | 188 |
| AAR16367 | 135 | T....Q...N | .SI.HRKF.NTLC-.VYFPRNSTME | K...PN.DV.H.TR.G.. | 188 |
| AAR16356 | 135 | T....Q...N | .SI.HRKF.NTLC-.VYFPRNSTME | K...PN.DV.H.TR.G.. | 188 |
| ABN50152 | 92  | T....R...N | .SI.HRKF.NTPC-.VYFPRNSTME | Q...PG.DV.H.TS.G.. | 145 |
| AAP03656 | 135 | T....Q...N | .SI.HRKF.NTPC-.VYFPRNSTME | Q...PN.DV.HNTS.G.. | 188 |
| AAL18132 | 133 | T....R...N | .SI.HRKF.NTLC-.VYFPRNSTME | Q...PN.DV.H.TR.GI. | 186 |
| ABF22626 | 135 | T....R...N | .SI.HRKF.NAPC-.VYFPRNSTME | Q...PN.DV.HAASOG.. | 188 |
| ABF22628 | 135 | T....R...N | .SI.HRKF.NAPC-.VYFPRNSTME | Q...PN.DV.HAASOG.. | 188 |
| ABN50155 | 92  | T....R...N | .SI.HRKF.NAPC-.VYFPRNSTME | Q...PN.DV.H.TSOGI. | 145 |
| ABN80967 | 135 | T....Q...N | .SI.HRKF.NTPC-.VYFPRNSTME | Q...PN.AV.H.TR.G.. | 188 |
| AAR16387 | 135 | T....R...N | .SI.HRKF.NTLC-.VYFPRNSTME | Q...PN.DV.H.TS.G.. | 188 |
| AAP83892 | 135 | T....R...N | .SI.HRKF.NTLC-.VYFPRNSTME | Q...PN.DV.H.TROG.. | 188 |
| ABF01035 | 135 | T....Q...N | .SI.HSKF.NTPC-.VYFPRNSTME | Q...PN.DV.H.TR.G.. | 188 |
| ABN80973 | 135 | T....Q...N | .SI.HRKF.NTPC-.VYFPRNSTME | Q...PN.AV.H.TR.G.. | 188 |
| AAR16412 | 135 | T....Q...N | .SI.HRKF.NTLC-.VYFPRNSTME | K...PN.DV.H.TR.G.. | 188 |
| ABF01027 | 135 | T....Q...N | .SI.HSKF.NTPC-.VYFPRNSTME | Q...PN.DV.H.TR.G.. | 188 |
| AAL18129 | 135 | T....R...N | .SI.HRKF.NTLC-.VYFPRNSTME | Q...PN.DV.H.TS.G.. | 188 |
| AAL18141 | 135 | T....Q...N | .SI.HRKF.NTLC-.VYFPRNSTME | Q...PN.DV.H.TR.G.. | 188 |
| ABD24386 | 135 | T....Q...N | .SI.HRKF.NTLC-.VYFPRNSTME | Q...PN.DV.HPTR.G.. | 188 |
| ABN80970 | 135 | T....Q...N | .SI.HRKF.NAPC-.VYFPRNSTME | Q...PN.AV.H.TR.G.. | 188 |
| ABB77692 | 134 | T....Q...N | .SI.HRKF.NTLC-.VYFPRNSTME | Q...PN.DV.H.TROG.. | 187 |
| ABN50144 | 92  | T....R...N | .SI.HRKF.NTPC-.VYFPRNSTME | Q...PD.DV.H.TS.G.. | 145 |
| ABA29175 | 90  | T....R...N | .SI.HRKF.NTPC-.VYFPRNSTME | Q...PN.DV.H.TS.GF. | 143 |
| ABN80949 | 135 | T....Q...N | .I.HRKF.NTPC-.VYFPRNSTME  | Q...PN.PV.H.TR.G.. | 188 |
| AAP03661 | 135 | T....R...N | .SI.HRKF.NTPC-.VYFPRNSTME | Q...PN.DV.HITS.G.. | 188 |
| ABN80946 | 135 | T....Q...N | .SI.HRKF.NTPC-.VYFPRNSTME | Q...PN.AV.H.TR.G.. | 188 |
| ABQ65642 | 91  | T....Q...N | .SI.HRKF.NTPC-.VYFPRNSTME | Q...SN.DV.H.TX.G.. | 144 |
| AAL18124 | 133 | T....R...N | .SI.HRKF.NTLC-.VYFPRNSTME | Q...PN.DV.H.TK.G.. | 186 |
| AAR16365 | 135 | T....Q...N | .SI.HRKF.NTLC-.VYFPRNSTME | K...PN.DV.HPTR.G.. | 188 |
| ABN80945 | 135 | T....Q...N | .SI.HRKF.NTPC-.VYFPRNSTME | Q...PN.AV.H.TR.G.. | 188 |
| ABN80976 | 135 | T....Q...N | .SI.HRKF.NTPC-.VYFPRNSTME | Q...PN.DV.R.TS.G.. | 188 |
| ABN50167 | 90  | T....R...N | .SI.HRKF.NTPC-.VYFPRNSAME | Q...PD.DV.H.SS.G.. | 143 |
| ABF22646 | 135 | T....Q...N | .SI.HRKF.NTPC-.VYFPRNSTME | Q...PN.DV.R.TS.G.. | 188 |
| ABN80969 | 135 | T....Q...N | .SI.HRKF.NTPC-.VYFPRNSTME | Q...PN.AV.H.TR.G.. | 188 |
| ABN80968 | 135 | T....Q...N | .SI.HRKF.NTPC-.VYFPRNSTME | Q...PN.AV.H.TR.G.. | 188 |
| ABN80923 | 135 | T....Q...N | .I.HRKF.NTPC-.VYFPRNSTME  | Q...PN.AV.H.TR.G.. | 188 |
| ABN80953 | 135 | T....Q...N | .SI.HRKF.NAPC-.VYFPRNSTME | Q...PN.AV.H.TR.G.. | 188 |
| AAQ76055 | 131 | T....Q...N | .SI.HSKF.NTPC-.VYFPRNSTME | Q...PN.DV.H.TR.G.. | 184 |
| ABN80942 | 135 | T....Q...N | .I.HRKF.NTPC-.VYFPRNSTME  | Q...PN.AV.H.TR.G.. | 188 |
| ABN80920 | 135 | T....Q...N | .SI.HRKF.NTPC-.VYFPRNSTME | Q...PN.AV.H.TR.G.. | 188 |
| ABN50189 | 92  | T....R...N | .SI.HRKF.NAPC-.VYFPRNSTME | Q...PD.DV.H.TS.GI. | 145 |
| ABN80948 | 135 | T....Q...N | .I.HRKF.NTPC-.VYFPRNSTME  | Q...PN.DV.H.AR.G.. | 188 |
| ABN80947 | 135 | T....Q...N | .SI.HRKF.NTPC-.VYFPRNSTME | Q...PN.AV.H.TR.G.. | 188 |

|          |     |    |     |   |    |   |    |    |       |       |   |            |   |     |     |    |      |        |      |     |     |     |
|----------|-----|----|-----|---|----|---|----|----|-------|-------|---|------------|---|-----|-----|----|------|--------|------|-----|-----|-----|
| ABN80917 | 135 | T  | ... | Q | .. | N | .. | I  | HRKF  | NTPC  | - | VYFPRNSTME | Q | ... | PN  | AV | H    | TR     | G    | ..  | 188 |     |
| ABN50166 | 92  | T  | ... | R | .. | N | .. | SI | HRKF  | NTPC  | - | VYFPRNSTME | Q | ... | PD  | DV | H    | TS     | G    | ..  | 145 |     |
| AAP83891 | 135 | T  | ... | R | .. | N | .. | SI | HRKF  | NTLC  | - | VYFPRNSTME | Q | ... | PN  | DV | H    | TR     | GI   | ..  | 188 |     |
| AAD34958 | 134 | T  | ... | R | .. | N | .. | SI | HRKF  | NTPC  | - | VYFPRNSTME | Q | ... | PN  | DV | H    | IS     | G    | ..  | 187 |     |
| ABN80955 | 135 | T  | ... | Q | .. | N | .. | I  | HRKF  | NTPC  | - | VYFPRNSTME | Q | ... | PN  | AV | H    | TR     | G    | ..  | 188 |     |
| ABN80915 | 135 | T  | ... | Q | .. | N | .. | I  | HRKF  | NTPC  | - | VYFPRNSTME | Q | ... | PN  | AV | H    | TR     | G    | ..  | 188 |     |
| ABN80918 | 135 | T  | ... | Q | .. | N | .. | I  | HRKF  | NTPC  | - | VYFPRNSTME | Q | ... | PN  | AV | H    | TR     | G    | ..  | 188 |     |
| ABN80935 | 135 | T  | ... | Q | .. | N | .. | I  | HRKF  | NTPC  | - | VYFPRNSTME | Q | ... | PN  | AV | H    | TR     | G    | ..  | 188 |     |
| ABN80959 | 135 | T  | ... | Q | .. | N | .. | SI | HRKF  | NTPC  | - | VYFPRNSTME | Q | ... | PN  | AV | H    | TR     | G    | ..  | 188 |     |
| ABN80930 | 135 | T  | ... | Q | .. | N | .. | I  | HRKF  | NTPC  | - | VYFPRNSTME | Q | ... | PN  | AV | H    | TR     | G    | ..  | 188 |     |
| ABN80916 | 135 | T  | ... | Q | .. | N | .. | I  | HRKF  | NTPC  | - | VYFPRNSTME | Q | ... | PN  | AV | H    | TR     | G    | ..  | 188 |     |
| ABD24379 | 135 | T  | ... | Q | .. | N | .. | SI | HRKF  | NTLC  | - | VYFPRNSTME | Q | ... | PN  | DV | HPTR | G      | ..   | 188 |     |     |
| AAP03683 | 135 | T  | ... | R | .. | N | .. | SI | HRKF  | NTPC  | - | VYFPRNSTME | Q | ... | PD  | DV | Y    | TS     | G    | ..  | 188 |     |
| AAP03655 | 135 | T  | ... | R | .. | N | .. | SI | HRKF  | NTPC  | - | VYFPRNSTME | Q | ... | PN  | DV | H    | HNTSQG | ..   | 188 |     |     |
| ABC84851 | 135 | T  | ... | R | .. | N | .. | I  | HRKF  | NTPC  | - | VYFPRNSTME | Q | ... | PN  | DV | H    | TS     | G    | ..  | 188 |     |
| ABC84848 | 135 | T  | ... | R | .. | N | .. | SI | HRKF  | NTPC  | - | VYFPRNSTME | Q | ... | PN  | DV | H    | TSQG   | ..   | 188 |     |     |
| ABF22634 | 135 | T  | ... | R | .. | N | .. | SI | HRKF  | NAPC  | - | VYFPRNSTME | Q | ... | PN  | DV | H    | HAPS   | G    | ..  | 188 |     |
| ABN80954 | 135 | T  | ... | Q | .. | N | .. | I  | HRKF  | NTPC  | - | VYFPRNSTME | Q | ... | PN  | AV | H    | TR     | G    | ..  | 188 |     |
| ABF01037 | 135 | T  | ... | Q | .. | N | .. | SI | HSKF  | NTPC  | - | VYFPRNSTME | K | ... | PN  | DV | H    | TR     | G    | ..  | 188 |     |
| ABF22629 | 135 | T  | ... | R | .. | N | .. | SI | HRKF  | NAPC  | - | VYFPRNST   | E | Q   | ... | PN | DV   | H      | HATS | G   | ..  | 188 |
| ABF22631 | 135 | T  | ... | R | .. | N | .. | SI | HRKF  | NAPC  | - | VYFPRNST   | E | Q   | ... | PN | DV   | H      | HATS | G   | ..  | 188 |
| AAQ76048 | 135 | T  | ... | Q | .. | N | .. | SI | HSKF  | NTPC  | - | VYFPRNSTME | K | ... | PN  | DV | H    | TR     | G    | ..  | 188 |     |
| AAQ76057 | 135 | T  | ... | Q | .. | N | .. | SI | HSKF  | NTPC  | - | VYFPRNSTME | K | ... | PN  | DV | H    | TR     | G    | ..  | 188 |     |
| ABN80924 | 135 | T  | ... | Q | .. | N | .. | I  | HRKF  | NTPC  | - | VYFPRNSTME | Q | ... | PN  | AV | H    | TR     | G    | ..  | 188 |     |
| ABN80939 | 135 | T  | ... | Q | .. | N | .. | I  | HRKF  | NTPC  | - | VYFPRNSTME | Q | ... | PN  | AV | H    | TR     | G    | ..  | 188 |     |
| ABF01036 | 135 | T  | ... | Q | .. | N | .. | SI | HSKF  | NTPC  | - | VYFPRNSTME | K | ... | PN  | DV | H    | TR     | G    | ..  | 188 |     |
| ABF01038 | 135 | T  | ... | Q | .. | N | .. | SI | HSKF  | NTPC  | - | VYFPRNSTME | K | ... | PN  | DV | H    | TR     | G    | ..  | 188 |     |
| ABF01022 | 135 | T  | ... | Q | .. | N | .. | SI | HSKF  | NTPC  | - | VYFPRNSTME | K | ... | PN  | DV | H    | TR     | G    | ..  | 188 |     |
| ABF22638 | 135 | T  | ... | R | .. | N | .. | SI | HRKF  | NAPC  | - | VYFPRNSTME | Q | ... | PN  | DV | QATS | G      | ..   | 188 |     |     |
| AAL18108 | 135 | T  | ... | Q | .. | N | .. | SI | HRKF  | NNLC  | - | VYFPRNSTME | Q | ... | PN  | DV | H    | TR     | G    | ..  | 188 |     |
| ABN50160 | 92  | T  | ... | R | .. | N | .. | SI | HRKF  | NTPC  | - | VYFPRNSTMC | Q | ... | PN  | DV | H    | TS     | G    | ..  | 145 |     |
| AAK20246 | 135 | T  | ... | R | .. | N | .. | SI | HRKF  | NTLC  | - | VYFPRNSTME | Q | ... | SN  | DV | H    | TR     | G    | ..  | 188 |     |
| AAQ76063 | 135 | T  | ... | Q | .. | N | .. | SI | HSKF  | NTPC  | - | VYFPRNSTME | Q | ... | PN  | DV | H    | TR     | G    | ..  | 188 |     |
| ABN80964 | 135 | T  | ... | Q | .. | N | .. | I  | HRKF  | NTPC  | - | VYFPRNSTME | Q | ... | PN  | AV | H    | TR     | G    | ..  | 188 |     |
| AA16361  | 135 | T  | ... | Q | .. | N | .. | SI | HRKF  | NNLC  | - | VYFPRNSTME | Q | ... | PN  | DV | H    | TR     | G    | ..  | 188 |     |
| ABQ65662 | 89  | T  | ... | R | .. | N | .. | SI | HRKF  | NTPC  | - | VYFPRNSTME | Q | ... | PN  | VV | H    | TR     | G    | ..  | 142 |     |
| AA16395  | 135 | T  | ... | R | .. | N | .. | SI | NRKF  | NTLC  | - | VYFPRNSTME | Q | ... | PN  | DV | H    | TR     | G    | ..  | 188 |     |
| AAQ76072 | 136 | T  | ... | Q | .. | N | .. | SI | HRKF  | NL    | - | VYFPRNSTME | Q | ... | PN  | DV | H    | TR     | G    | ..  | 189 |     |
| AA16347  | 135 | T  | ... | R | .. | N | .. | SI | HRKF  | NTLC  | - | VYFPRNSTME | Q | ... | PN  | DV | Q    | TR     | G    | ..  | 188 |     |
| AAK93938 | 92  | T  | ... | R | .. | N | .. | SI | HRKF  | NTPC  | - | VYFPRNSTME | Q | ... | PD  | DV | H    | HPTS   | G    | ..  | 145 |     |
| ABC84847 | 135 | T  | ... | R | .. | N | .. | SI | HRKF  | NTLC  | - | VYFPRNSTME | Q | ... | PN  | DV | H    | TS     | G    | ..  | 188 |     |
| ABN50170 | 92  | T  | ... | R | .. | N | .. | SI | HRKF  | NTPC  | - | VYFPRNSTME | R | ... | PD  | DV | H    | TS     | G    | ..  | 145 |     |
| ABN80958 | 135 | T  | ... | Q | .. | N | .. | SI | HRKF  | NTPC  | - | VYFPRNSTME | Q | ... | PN  | AV | H    | TS     | G    | ..  | 188 |     |
| ABQ65656 | 91  | T  | ... | R | .. | N | .. | SI | HRKF  | NTPC  | - | VYFPRNSTME | Q | ... | PN  | VV | H    | SS     | G    | ..  | 144 |     |
| ABN80913 | 135 | T  | ... | R | .. | N | .. | SI | HRKF  | NTPC  | - | VYFPRNSTME | Q | ... | PN  | DV | H    | PS     | G    | ..  | 188 |     |
| AA18355  | 135 | T  | ... | R | .. | N | .. | SI | HRKF  | NTPC  | - | VYFPRNSTMD | Q | ... | PN  | DV | H    | TK     | G    | ..  | 188 |     |
| AA18353  | 135 | T  | ... | R | .. | N | .. | SI | HRKF  | NTPC  | - | VYFPRNSTMD | Q | ... | PN  | DV | H    | TR     | G    | ..  | 188 |     |
| ABN50186 | 92  | T  | ... | R | .. | N | .. | SI | HRKF  | NTPC  | - | VYFPRNSTME | Q | ... | PD  | DV | Y    | TS     | G    | ..  | 145 |     |
| ABC71317 | 135 | T  | ... | R | .. | N | .. | SI | NRKF  | NTLC  | - | VYFPRNSTME | Q | ... | PN  | DV | H    | TR     | G    | ..  | 188 |     |
| AA18351  | 135 | T  | ... | R | .. | N | .. | SI | HRKF  | NTPC  | - | VYFPRNSTMD | Q | ... | PN  | DV | H    | TK     | G    | ..  | 188 |     |
| AA16354  | 155 | T  | ... | Q | .. | N | .. | SI | HRKF  | NTLC  | - | VYFPRNSTME | Q | ... | PN  | DV | H    | TR     | G    | ..  | 208 |     |
| ABN80950 | 135 | T  | ... | Q | .. | N | .. | SI | HRKF  | NTPC  | - | VYFPRNSTME | Q | ... | PN  | AV | H    | TS     | G    | ..  | 188 |     |
| AAL18130 | 135 | T  | ... | Q | .. | N | .. | SI | HRKF  | NTLC  | - | VYFPRNSTME | Q | ... | PN  | DV | N    | TR     | G    | ..  | 188 |     |
| ABN50156 | 92  | T  | ... | R | .. | N | .. | SI | MHRKF | NAPC  | - | VYFPRNSAMD | Q | ... | PN  | DV | H    | TS     | GL   | ..  | 145 |     |
| AA16379  | 135 | T  | ... | R | .. | N | .. | SI | HRKF  | NTLC  | - | VYFPRNSTME | Q | ... | PN  | DV | H    | TROG   | ..   | 188 |     |     |
| ABN80965 | 135 | T  | ... | Q | .. | N | .. | SI | HRKF  | NTPC  | - | VYFPRNSTME | Q | ... | PN  | AV | H    | TS     | G    | ..  | 188 |     |
| ABF22616 | 135 | T  | ... | Q | .. | N | .. | SI | HRKF  | NIP-G | - | VYFPRNSTME | Q | ... | PN  | DV | H    | AS     | G    | ..  | 188 |     |
| AAL18139 | 135 | T  | ... | R | .. | N | .. | SI | HRKF  | NTLC  | - | VYFPRNSTME | Q | ... | PN  | DV | H    | TR     | GI   | ..  | 188 |     |
| AA18354  | 135 | T  | ... | R | .. | N | .. | SI | HRKF  | NTPC  | - | VYFPRNSTMD | Q | ... | PN  | DV | H    | TK     | G    | ..  | 188 |     |
| ABN80963 | 135 | T  | ... | Q | .. | N | .. | SI | HRKF  | NTPC  | - | VYFPRNSTME | Q | ... | PN  | AV | H    | TS     | G    | ..  | 188 |     |
| AA120256 | 135 | TV | ... | R | .. | N | .. | SI | HRKF  | NTLC  | - | VYFPRNSTME | Q | ... | PN  | DV | H    | TR     | G    | ..  | 188 |     |
| AAL18095 | 135 | T  | ... | R | .. | N | .. | SI | HRKF  | NTLC  | - | VYFPRNSTME | Q | ... | PN  | DV | H    | HATR   | G    | ..  | 188 |     |
| ABN80938 | 135 | T  | ... | Q | .. | N | .. | SI | HRKF  | NTPC  | - | VYFPRNSTME | Q | ... | PN  | AV | H    | TS     | G    | ..  | 188 |     |
| ABN80936 | 135 | T  | ... | Q | .. | N | .. | SI | HRKF  | NTPC  | - | VYFPRNSTME | Q | ... | PN  | AV | H    | TS     | G    | ..  | 188 |     |
| AA18348  | 135 | T  | ... | R | .. | N | .. | SI | HRKF  | NTPC  | - | VYFPRNSTME | Q | ... | PN  | DV | H    | STKOG  | ..   | 188 |     |     |
| ABN80971 | 135 | T  | ... | Q | .. | N | .. | SI | HRKF  | NTPC  | - | VYFPRNSTME | Q | ... | PN  | AV | H    | TS     | G    | ..  | 188 |     |
| ABN80957 | 135 | T  | ... | Q | .. | N | .. | SI | HRKF  | NTPC  | - | VYFPRNSTME | Q | ... | PN  | AV | H    | TS     | G    | ..  | 188 |     |
| ABN80972 | 135 | T  | ... | Q | .. | N | .. | SI | HRKF  | NTPC  | - | VYFPRNSTME | Q | ... | PN  | AV | H    | TS     | G    | ..  | 188 |     |
| ABB77691 | 134 | T  | ... | X | .. | N | .. | SI | HRKF  | NTLC  | - | VYFPRNSTME | Q | ... | PN  | DV | H    | TR     | GI   | ..  | 187 |     |
| AA16411  | 135 | T  | ... | Q | .. | N | .. | SI | HRKF  | NTLC  | - | VYFPRNSTME | Q | ... | PN  | DV | R    | SR     | G    | ..  | 188 |     |
| ABN80919 | 135 | T  | ... | Q | .. | N | .. | SI | HRKF  | NTPC  | - | VYFPRNSTME | Q | ... | PN  | AV | H    | TS     | G    | ..  | 188 |     |
| ABQ65646 | 91  | T  | ... | R | .. | N | .. | SI | HRKF  | NTPC  | - | VYFPRNSTME | Q | ... | PN  | VV | H    | TS     | G    | ..  | 144 |     |
| ABC84844 | 135 | T  | ... | R | .. | N | .. | SI | HRKF  | NNLC  | - | VYFPRNSTME | Q | ... | PN  | DV | H    | TS     | G    | ..  | 188 |     |
| ABN80929 | 135 | T  | ... | Q | .. | N | .. | SI | HRKF  | NTPC  | - | VYFPRNSTME | Q | ... | PN  | AV | H    | TS     | G    | ..  | 188 |     |
| ABQ65675 | 89  | T  | ... | R | .. | N | .. | SI | HRKF  | NTPC  | - | VYFPRNSTME | Q | ... | PN  | VV | H    | TS     | G    | ..  | 142 |     |
| ABQ65652 | 91  | T  | ... | R | .. | N | .. | SI | HRKF  | NTPC  | - | VYFPRNSTME | Q | ... | PN  | VV | H    | TS     | G    | ..  | 144 |     |
| AAD34960 | 135 | T  | ... | R | .. | N | .. | SI | HRKF  | NTPC  | - | VYFPRNSTMD | Q | ... | PN  | DV | H    | TSQG   | ..   | 188 |     |     |
| ABA29184 | 90  | T  | ... | R | .. | N | .. | SI | HRKF  | NTPC  | - | VYFPRNSTMD | Q | ... | PN  | DV | H    | TSQG   | ..   | 143 |     |     |
| ABA29186 | 90  | T  | ... | R | .. | N | .. | SI | HRKF  | NTPC  | - | VYFPRNSTMD | Q | ... | PN  | DV | H    | TSQG   | ..   | 143 |     |     |
| ABQ65667 | 91  | T  | ... | R | .. | N | .. | SI | HRKF  | NTPC  | - | VYFPRNSTME | Q | ... | PN  | VV | H    | TS     | G    | ..  | 144 |     |
| ABC84842 | 135 | T  | ... | R | .. | N | .. | SI | HRKF  | NNLC  | - | VYFPRNSTME | H | ... | PN  | DV | H    | TS     | GI   | ..  | 188 |     |
| AA16398  | 135 | T  | ... | R | .. | N | .. | SI | HRKF  | NTLC  | - | VYFPRNSTME | Q | ... | PN  | DV | H    | TX     | G    | ..  | 188 |     |
| AA16350  | 135 | T  | ... | Q | .. | N | .. | SI | HRKF  | NTLC  | - | VYFPRNSTME | Q | ... | PK  | DV | H    | TR     | G    | ..  | 188 |     |
| ABF22622 | 135 | T  | ... | R | .. | N | .. | SI | HRKF  | NAPC  | - | VYFPRNSTME | Q | ... | PN  | XV | H    | HATS   | G    | ..  | 188 |     |
| ABA29180 | 90  | T  | ... | R | .. | N | .. | SI | HRKF  | NTPC  | - | VYFPRNSTMD | Q | ... | PN  | DV | H    | TSQG   | ..   | 143 |     |     |
| ABN80937 | 135 | T  | ... |   |    |   |    |    |       |       |   |            |   |     |     |    |      |        |      |     |     |     |

|              |     |                        |                           |                             |     |
|--------------|-----|------------------------|---------------------------|-----------------------------|-----|
| AAR16373     | 136 | T . . . . Q . . . N .  | .SI.HRKF.NTLC-.VYFPRNSTME | Q . . . . PN.DV.H.TR.G . .  | 188 |
| AAP03686     | 135 | T . . . . R . . . N .  | .SI.HRKF.NTPC-.VYFPRNSTME | Q . . . . PN.EV.HITS.G . .  | 188 |
| AAD34954     | 140 | T . . . . R . . . N .  | .SI.HRKF.NTPC-.VYFPRNSTME | Q . . . . TN.VV.H.TS.G . .  | 193 |
| AAH50158     | 92  | T . . . . R . . . N .  | .SI.HRKF.NTPC-.VYFPRNSTME | Q . . . . PD.DV.H.TS.G . .  | 145 |
| ABN83899     | 135 | T . . . . R . . . N .  | .SI.HRKF.NTLC-.VYFPRNSTME | Q . . . . PN.XV.H.TR.G . .  | 188 |
| ABC84833     | 135 | T . . . . R . . . N .  | .SI.HRKF.NTLC-.VYFPRNSTME | Q . . . . PN.DV.H.TSQG . .  | 188 |
| ABF22620     | 135 | T . . . . R . . . N .  | .SI.HRKF.NTPC-.VYFPRNSTME | Q . . . . PN.DV.HAMS.G . .  | 188 |
| AAR16404     | 135 | T . . . . Q . . . N .  | .SI.HRKF.NTLC-.VYFPRNSTME | Q . . . . PN.DV.H.TR.G . .  | 188 |
| ABF22633     | 135 | T . . . . R . . . N .  | .SI.HRKF.NAPC-.VYFPRNST.E | Q . . . . PN.DV.HATSQG . .  | 188 |
| ABA29187     | 90  | T . . . . R . . . N .  | .SI.HRKF.NTPC-.VYFPRNSTMD | Q . . . . PN.DV.H.TSQG . .  | 143 |
| ABF01029     | 135 | T . . . . Q . . . N .  | .I.HSKF.NTPC-.VYFPRNSTME  | Q . . . . PN.DV.HATR.G . .  | 188 |
| ABQ65650     | 91  | T . . . . R . . . N .  | .SI.HRKF.NTPC-.VYFPRNSTME | Q . . . . PN.VV.H.TS.G . .  | 144 |
| ABD24387     | 135 | T . . . . Q . . . N .  | .SI.HRKF.NTLC-.VYFPRNSTME | Q . . . . PN.DV.H.TR.G . .  | 188 |
| ABQ65659     | 89  | T . . . . R . . . N .  | .SI.HRKF.NTPC-.VYFPRNSTME | Q . . . . PN.VV.H.TS.G . .  | 142 |
| AAZ29192     | 90  | T . . . . R . . . N .  | .SI.HRKF.NTPC-.VYFPRNSTMD | Q . . . . PN.DV.H.TSQG . .  | 143 |
| AAS18350     | 135 | T . . . . R . . . N .  | .SI.QRKF.NTPC-.VYFPRNSTME | Q . . . . PN.DV.HSTROG . .  | 188 |
| ABC84846     | 135 | T . . . . R . . . N .  | .SI.HRKF.NNLC-.VYFPRNSTME | Q . . . . PN.DV.H.TS.G . .  | 188 |
| ABN80921     | 135 | T . . . . Q . . . N .  | .I.HRKF.NTPC-.VYFPRNSTME  | Q . . . . PN.DV.H.TK.G . .  | 188 |
| AAN46465     | 140 | T . . . . R . . . N .  | .SI.HRKF.NTPC-.VYFPRNSTME | Q . . . . TN.VV.H.TS.G . .  | 193 |
| ABN80925     | 135 | T . . . . Q . . . N .  | .I.HRKF.NTPC-.VYFPRNSTME  | Q . . . . PN.DV.H.TK.G . .  | 188 |
| ABQ65678     | 89  | T . . . . R . . . N .  | .SI.HRKF.NTPC-.VYFPRNSTME | Q . . . . PN.VV.H.TS.G . .  | 142 |
| AAP83923     | 135 | T . . . . R . . . N .  | .SI.HRKF.NTPC-.VYFPRNNPIV | Q . . . . PN.DV.H.TR.G . .  | 188 |
| ABQ65666     | 89  | T . . . . R . . . N .  | .SI.HRKF.NTPC-.VYFPRNSTME | Q . . . . PN.VV.H.TS.G . .  | 142 |
| AAP03652     | 135 | T . . . . R . . . K .  | .SI.HRKF.NTPC-.VYFPRNSMME | Q . . . . PN.DV.H.TS.G . .  | 188 |
| ABN80926     | 135 | T . . . . Q . . . N .  | .I.HRKF.NTPC-.VYFPRNSTME  | Q . . . . PN.AV.H.TK.G . .  | 188 |
| ABN80962     | 135 | T . . . . Q . . . N .  | .SI.HRKF.NTPC-.VYFPRNSTME | Q . . . . PN.AV.HATR.G . .  | 188 |
| ABQ65647     | 89  | T . . . . R . . . N .  | .SIMHRKF.NTPC-.VYFPRNSTME | Q . . . . PN.VV.H.TS.G . .  | 142 |
| ABQ65665     | 91  | T . . . . R . . . N .  | .SI.HRKF.NTPC-.VYFPRNSTME | Q . . . . PN.VV.H.TS.GI . . | 144 |
| CAE53135     | 135 | T . . . . Q . . . N .  | .SI.HRKF.NTPC-.VYFPRNSTME | Q . . . . PN.AV.H.TR.G . .  | 188 |
| AAP03673     | 135 | T . . . . R . . . N .  | .SI.HRKF.NTSC-.VYFPRNSTME | Q . . . . PN.DV.H.TSQG . .  | 188 |
| ABQ65669     | 91  | T . . . . R . . . N .  | .SI.HRKF.NTPC-.VYFPRNSTME | Q . . . . PN.VV.H.TS.G . .  | 144 |
| AAS18340     | 135 | T . . . . Q . . . N .  | .I.HRKF.NTPC-.VYFPRNSTME  | Q . . . . PN.AV.H.TK.G . .  | 188 |
| AAN46464     | 140 | T . . . . R . . . N .  | .SI.HRKF.NTPC-.VYFPRNSTME | Q . . . . TN.VV.H.TS.G . .  | 193 |
| AAV32565     | 135 | T . . . . R . . . N .  | .SI.HRKF.NTPC-.VYFPRNSTME | Q . . . . PN.DV.H.TG . .    | 188 |
| ABQ65654     | 89  | T . . . . R . . . N .  | .SI.HRKF.NTPC-.VYFPRNSTME | Q . . . . PN.VV.H.TS.G . .  | 142 |
| ABF22619     | 135 | T . . . . R . . . N .  | .SI.HRKF.NTPC-.VYFPRNSTME | Q . . . . PG.DV.H.AS.GT . . | 188 |
| ABQ65676     | 91  | T . . . . R . . . N .  | .SI.HRKF.NTPC-.VYFPRNSTME | Q . . . . PN.VV.H.TS.G . .  | 144 |
| AAL18145     | 135 | T . . . . R . . . N .  | .SI.HRKF.NTLC-.VYFPRNSTME | Q . . . . PS.DV.H.TRXG . .  | 188 |
| ABQ65649     | 79  | T . . . . R . . . N .  | .SI.HRKF.NTPC-.VYFPRNSTME | Q . . . . PN.DV.H.TS.G . .  | 132 |
| ABC84837     | 135 | T . . . . R . . . N .  | .SI.HRKF.NNLC-.VYFPRNSTME | Q . . . . PN.DV.H.TS.G . .  | 188 |
| NP_001026359 | 168 | T . . . . R . . . N .  | .SI.HRKF.NTPC-.VYFPRNSTME | Q . . . . AN.EV.H.PS.G . .  | 221 |
| AAL18104     | 135 | T . . . . Q . . . N .  | .SI.HRKF.NTLC-.VYFPRNSTME | H . . . . SN.DV.R.TS.G . .  | 188 |
| ABN80922     | 135 | T . . . . Q . . . N .  | .SI.HRKF.STPC-.VYFPRNSTME | Q . . . . PN.AV.H.TS.G . .  | 188 |
| ABF22621     | 135 | T . . . . R . . . N .  | .SI.HRKF.NAPC-.VYFPRNSTME | Q . . . . PN.DV.HATS.G . .  | 188 |
| AAL18154     | 135 | T . . . . Q . . . N .  | .SI.HRKF.NTLC-.VYFPRNSTME | Q . . . . PN.EV.N.TR.G . .  | 188 |
| AAV32559     | 135 | T . . . . R . . . N .  | .SI.HRKF.NTPC-.VYFPRNSTME | Q . . . . PN.DV.H.TG . .    | 188 |
| AAL18118     | 135 | T . . . . R . . . N .  | .SI.HRKF.NTLC-.VYFPRNSTME | Q . . . . PN.DV.HITROG . .  | 188 |
| ABN80927     | 135 | T . . . . Q . . . N .  | .I.HRKF.NTPC-.VYFPRNSTME  | Q . . . . PN.AV.H.TK.G . .  | 188 |
| AAR16384     | 135 | T . . . . R . . . N .  | .SI.HRKF.NVPC-.VYFPRNSMME | Q . . . . PK.DV.H.TS.G . .  | 188 |
| ABQ65651     | 91  | T . . . . R . . . N .  | .SI.HRKF.NTPC-.VYFPRNSTME | Q . . . . PN.VV.H.TS.G . .  | 144 |
| ABN80951     | 135 | T . . . . Q . . . N .  | .I.HRKF.NTPC-.VYFPRNSTME  | Q . . . . PN.AV.H.TK.G . .  | 188 |
| ABN80944     | 135 | T . . . . Q . . . N .  | .I.HRKF.NTPC-.VYFPRNSTME  | Q . . . . PN.AV.H.TK.G . .  | 188 |
| CAE53140     | 135 | T . . . . Q . . . N .  | .SI.HRKF.NAPC-.VYFPRNSTME | Q . . . . PN.AV.H.TR.G . .  | 188 |
| AAR16416     | 135 | T . . . . Q . . . N .  | .SI.HRKF.NTLC-.VYFPRNSTME | Q . . . . PN.DV.H.TR . .    | 188 |
| ABN80928     | 135 | T . . . . Q . . . N .  | .I.HRKF.NTPC-.VYFPRNSTME  | Q . . . . PN.AV.H.TK.G . .  | 188 |
| ABN80934     | 135 | T . . . . Q . . . N .  | .I.HRKF.NTPC-.VYFPRNSTME  | Q . . . . PN.AV.H.TK.G . .  | 188 |
| AAQ76081     | 135 | T . . . . Q . . . N .  | .SI.HSKF.NTLC-.VYFPRNSTME | Q . . . . PN.DV.H.TR.G . .  | 188 |
| ABF22630     | 135 | TV . . . . R . . . N . | .SI.HRKF.NAPC-.VYFPRNST.E | Q . . . . PN.DV.HATS.G . .  | 188 |
| AAQ76062     | 135 | T . . . . Q . . . N .  | .SI.HSKF.NTPC-.VYFPRNSTME | Q . . . . PN.DV.HXTR.G . .  | 188 |
| ABQ65663     | 89  | T . . . . R . . . N .  | .SI.HRKF.NTPC-.VYFPRNSTME | Q . . . . PN.VV.H.TS.G . .  | 142 |
| AAR16388     | 135 | T . . . . Q . . . N .  | .SI.HRKF.NTLC-.VYFPRNSTME | Q . . . . PN.DV.N.TROG . .  | 188 |
| CAE53134     | 135 | T . . . . Q . . . N .  | .SI.HRKF.NTPC-.VYFPRNSTME | Q . . . . PN.AV.H.TR.G . .  | 188 |
| AAR16349     | 135 | T . . . . R . . . N .  | .SI.HRKF.NTLC-.VYFPRNSTME | Q . . . . PN.DV.H.TT.G . .  | 188 |
| CAE53116     | 135 | T . . . . Q . . . N .  | .SI.HRKF.NTPC-.VYFPRNSTME | Q . . . . PN.AV.H.TR.G . .  | 188 |
| CAE53114     | 135 | T . . . . Q . . . N .  | .SI.HRKF.NTPC-.VYFPRNSTME | Q . . . . PN.AV.H.TR.G . .  | 188 |
| AAL18138     | 135 | T . . . . R . . . N .  | .SI.HRKF.NNLC-.VYFPRNSTME | Q . . . . PN.DV.H.TS.GI . . | 188 |
| CAH23276     | 135 | T . . . . Q . . . N .  | .SI.HRKF.NTPC-.VYFPRNSTME | Q . . . . PN.AV.H.TR.G . .  | 188 |
| CAE53126     | 135 | T . . . . Q . . . N .  | .SI.HRKF.NTPC-.VYFPRNSTME | Q . . . . PN.AV.H.TR.G . .  | 188 |
| CAE53118     | 135 | T . . . . Q . . . N .  | .SI.HRKF.NTPC-.VYFPRNSTME | Q . . . . PN.AV.H.TR.G . .  | 188 |
| CAE53137     | 135 | T . . . . Q . . . N .  | .SI.HRKF.NTPC-.VYFPRNSTME | Q . . . . PN.AV.H.TR.G . .  | 188 |
| CAE53121     | 135 | T . . . . Q . . . N .  | .SI.HRKF.NTPC-.VYFPRNSTME | Q . . . . PN.AV.H.TR.G . .  | 188 |
| CAE53115     | 135 | T . . . . Q . . . N .  | .SI.HRKF.NTPC-.VYFPRNSTME | Q . . . . PN.AV.H.TR.G . .  | 188 |
| AAL18109     | 135 | TT . . . . R . . . N . | .SI.HRKF.NTLC-.VYFPRNSTME | Q . . . . PN.DV.H.TR.G . .  | 188 |
| ABN50191     | 92  | T . . . . R . . . N .  | .SI.HRKF.NTSC-.VYFPRNSTME | Q . . . . PN.DV.H.TSQG . .  | 145 |
| ABQ65644     | 91  | T . . . . R . . . N .  | .SI.HRKF.NTPC-.VYFPRNSTME | Q . . . . PG.DV.H.AS.GT . . | 144 |
| CAE53130     | 135 | T . . . . Q . . . N .  | .SI.HRKF.NTPC-.VYFPRNSTME | Q . . . . PN.AV.H.TR.G . .  | 188 |
| AAR16413     | 135 | T . . . . Q . . . N .  | .SI.HRKF.NTLC-.VYFPRNSTME | Q . . . . PN.AV.H.TR.G . .  | 188 |
| ABN80940     | 135 | T . . . . Q . . . N .  | .I.HRKF.NTPC-.VYFPRNSTME  | Q . . . . PN.AV.H.TX.G . .  | 188 |
| CAE53129     | 135 | T . . . . Q . . . N .  | .SI.HRKF.NTPC-.VYFPRNSTME | Q . . . . PN.AV.H.TR.G . .  | 188 |
| CAE53127     | 135 | T . . . . Q . . . N .  | .SI.HRKF.NTPC-.VYFPRNSTME | Q . . . . PN.AV.H.TR.G . .  | 188 |
| AAQ76083     | 135 | T . . . . Q . . . N .  | .SI.HSKF.NTLC-.VYFPRNSTME | Q . . . . PN.DV.H.TR.G . .  | 188 |
| AAR16399     | 135 | T . . . . R . . . N .  | .SI.HRKF.NTLC-.VYFPRNSTME | Q . . . . PK.DV.H.TS.G . .  | 188 |
| AAL18140     | 135 | T . . . . R . . . N .  | .SI.HRKF.NTLC-.VYFPRNSTME | Q . . . . PK.DV.H.TS.G . .  | 188 |
| ABN80961     | 135 | T . . . . Q . . . N .  | .SI.HRKF.STPC-.VYFPRNSTME | Q . . . . PN.AV.H.TS.G . .  | 188 |
| AAP03682     | 135 | T . . . . R . . . N .  | .SI.HRKF.NTPC-.VYFPRNSTME | R . . . . N.DV.HNTS.G . .   | 188 |
| ABC84845     | 135 | T . . . . R . . . N .  | .SI.HRKF.NNLC-.VYFPRNSTME | Q . . . . PN.EV.H.TS.G . .  | 188 |
| ABC84838     | 135 | T . . . . R . . . N .  | .SI.HRKF.NNLC-.VYFPRNSTME | Q . . . . PN.DV.H.TS.GI . . | 188 |
| ABN80960     | 135 | T . . . . Q . . . N .  | .I.HRKF.NTPC-.VYFPRNSTME  | Q . . . . PN.AV.H.TK.G . .  | 188 |
| ABQ65670     | 91  | T . . . . R . . . N .  | .SI.HRKF.NTPC-.VYFPRNSTME | Q . . . . PN.VV.H.TS.GI . . | 144 |
| ABN50161     | 92  | T . . . . R . . . N .  | .SI.HRKF.NTPC-.VYFPRNSTME | Q . . . . PN.DL.HITS.G . .  | 145 |
| ABF01032     | 135 | T . . . . Q . . . N .  | .SI.HSKF.NTPC-.VYFPRNSTME | Q . . . . PN.DV.HXSR.G . .  | 188 |
| ABF22632     | 135 | T . . . . Q . . . N .  | .SI.HRKF.NAPC-.VYFPRNST.E | Q . . . . PN.DV.HAXS.G . .  | 188 |
| AAR16371     | 135 | T . . . . Q . . . N .  | .SI.HRKF.NTLC-.VYFPRNSTME | Q . . . . PN.DV.R.TR.G . .  | 188 |
| ABC71316     | 135 | T . . . . R . . . N .  | .SI.QRKF.NTLC-.VYFPRNSTME | Q . . . . PN.DV.H.TR.G . .  | 188 |
| AAL18092     | 135 | T . . . . R . . . N .  | .SI.HRKF.NTLC-.VYFPRNST.E | Q . . . . PN.DV.H.TROG . .  | 188 |
| AAD34956     | 140 | T . . . . R . . . N .  | .SI.HRKF.NTPC-.VYFPRNSTME | Q . . . . AN.EV.H.PS.G . .  | 193 |
| AAS18343     | 135 | T . . . . R . . . N .  | .SI.HRKF.NTPC-.VYFPRNSTME | Q . . . . AN.DV.H.TK.G . .  | 188 |
| ABN50146     | 92  | T . . . . R . . . N .  | .SI.HRKF.NTPC-.VYFPRNSAME | Q . . . . PD.DV.HATS.G . .  | 145 |
| AAQ76069     | 135 | T . . . . Q . . . N .  | .SI.HSKF.NTLC-.VYFPRNSTME | Q . . . . PN.DV.H.TR.G . .  | 188 |
| AAL18143     | 135 | T . . . . R . . . N .  | .SI.HRKF.NTLC-.VYFPRNSTME | Q . . . . PN.DV.R.TS.G . .  | 188 |
| AAL18146     | 135 | T . . . . R . . . N .  | .SI.HRKY.NTLC-.VYFPRNSTME | Q . . . . PN.DV.H.TS.G . .  | 188 |
| AAR16360     | 135 | T . . . . R . . . N .  | .SI.HRKF.NTLC-.VYFPRNSTME | Q . . . . PN.DV.H.TRXGI . . | 188 |
| AAL18137     | 135 | T . . . . R . . . N .  | .SI.HRKY.NTLC-.VYFPRNSTME | Q . . . . PN.DV.H.TS.G . .  | 188 |

|          |     |             |                            |                     |     |
|----------|-----|-------------|----------------------------|---------------------|-----|
| ABN50172 | 92  | T...R...R   | .SI.HRKF.NAPC-.VYFPRNSTME  | Q...PN.DV.H.TSWG..  | 145 |
| CAE53117 | 135 | T...Q...N   | .SI.HRKF.NTPC-.VYFPRNSTME  | Q...PN.AV.H.TR.G..  | 188 |
| ABN80914 | 135 | T...X...N   | .SILHRKF.NTPC-.VYFPRNSTME  | Q...PK.DV.H.TS.G..  | 188 |
| ABN50168 | 92  | TV...R...N  | .SI.HRKF.NTPC-.VYFPRNSTME  | Q...PD.DV.H.TS.G..  | 145 |
| ABO65658 | 77  | T...R...N   | .SI.HRKF.NTPC-.VYFPRNSTME  | Q...PN.VV.H.TS.G..  | 130 |
| CAE53138 | 135 | T...Q...N   | .SI.HRKF.NTPC-.VYFPRNSTME  | Q...PN.AV.H.TR.G..  | 188 |
| AAR16372 | 135 | T...R...N   | .SI.HRKF.NTPC-.VYFPRNSTME  | Q...PN.DV.Q.TR.G..  | 188 |
| AAP03678 | 135 | T...Q...N   | .SI.HRKF.NTPC-.VYFPRNSTME  | Q...QN.DV.HNTS.G..  | 188 |
| AAO76067 | 135 | T...Q...N   | .SI.HSKF.NTPC-.VYFPRNSTME  | Q...PN.DV.H.TR.G..  | 188 |
| ABO65677 | 89  | T...R...N   | .SI.HRKF.NTPC-.VYFPRNSTME  | Q...PN.VV.H.TSQG..  | 142 |
| AAN46474 | 140 | T...R...N   | .SI.HRKF.NTPC-.VYFPRNSTME  | Q...AN.DV.H.PSQGI.. | 193 |
| AAN46477 | 140 | T...R...N   | .SI.HRKF.NTPC-.VYFPRNSTME  | Q...AN.DV.H.PSQGI.. | 193 |
| AAR16397 | 135 | T...R...N   | .SI.HRKF.NTPC-.VYFPRNSTME  | Q...PN.EV.H.TS.G..  | 188 |
| AAO76080 | 135 | T...Q...N   | .SI.HSKF.NTPC-.VYFPRNSTME  | Q...PN.DV.H.TR.G..  | 188 |
| AAN46475 | 140 | T...R...N   | .SI.HRKF.NTPC-.VYFPRNSTME  | Q...AN.DV.H.PSQGI.. | 193 |
| AAN46469 | 140 | T...R...N   | .SI.HRKF.NTPC-.VYFPRNSTME  | Q...AN.DV.H.PSQGI.. | 193 |
| ABO65657 | 91  | T...R...N   | .SI.HRKF.NTPC-.VYFPRNSTME  | Q...PN.VV.H.TS.G..  | 144 |
| ABN80941 | 134 | T...Q...N   | .SI.HRKF.STPC-.VYFPRNSTME  | Q...PN.AV.H.TS.G..  | 187 |
| AAP03676 | 135 | T...R...N   | .SI.HRKF.YTPC-.VYFPRNSTME  | Q...PN.DV.HITS.G..  | 188 |
| AAN46471 | 140 | T...R...N   | .SI.HRKF.NTPC-.VYFPRNSTME  | Q...AN.DV.H.PSQGI.. | 193 |
| AAO76065 | 135 | T...Q...N   | .SI.HSKF.NTPC-.VYFPRNSTME  | Q...PN.DV.H.TR.G..  | 188 |
| AAN46473 | 140 | T...R...N   | .SI.HRKF.NTPC-.VYFPRNSTME  | Q...AN.DV.H.PSQGI.. | 193 |
| ABN80943 | 135 | T...Q...N   | .SI.HRKF.NTAC-.VYFPRNSTME  | Q...PN.AV.H.TR.G..  | 188 |
| AAO76078 | 135 | T...Q...N   | .SI.HSKF.NTPC-.VYFPRNSTME  | Q...PN.DV.H.TR.G..  | 188 |
| AAP83905 | 135 | TV...R...N  | .SI.HRKF.NTPC-.VYFPRNSTME  | Q...PN.DV.HNTR.G..  | 188 |
| AAR16343 | 135 | T...Q...N   | .SI.HSKF.NTPC-.VYFPRNSTME  | Q...PN.DV.H.TR.GI.. | 188 |
| AAO76077 | 135 | T...Q...N   | .SI.HSKF.NTPC-.VYFPRNSTME  | Q...PN.DV.H.TR.G..  | 188 |
| AAN46476 | 140 | T...R...N   | .SI.HRKF.NTPC-.VYFPRNSTME  | Q...AN.DV.H.PSQGI.. | 193 |
| ABF01033 | 135 | T...Q...N   | .SI.HSKF.NTPC-.VYFPRNSTME  | Q...PN.DV.H.TR.G..  | 188 |
| AAN46467 | 140 | T...R...N   | .SI.HRKF.NTPC-.VYFPRNSTME  | Q...AN.DV.H.PSQGI.. | 193 |
| AAN46472 | 140 | T...R...N   | .SI.HRKF.NTPC-.VYFPRNSTME  | Q...AN.DV.H.PSQGI.. | 193 |
| AAP03669 | 135 | T...R...N   | .SI.HRKF.NTPC-.VYFPRNSTME  | Q...PN.DV.R.TS..    | 188 |
| AAL18120 | 135 | T...R...N   | .SI.HRKF.NTPC-.VYFPRNSTME  | Q...PK.DV.H.TK.G..  | 188 |
| ABF22641 | 135 | T...Q...N   | .SIIHRKF.NTAC-.VYFPRNSTME  | Q...SN.DV.H.ASQG..  | 188 |
| AAR16415 | 135 | T...R...N   | .SI.HRKY.NTPC-.VYFPRNSTME  | Q...PN.DV.H.TS.G..  | 188 |
| AAD34964 | 135 | T...R...N   | .SI.HRKF.NTPC-.VYFPRNSTME  | Q...PN.DV.H.TRGG..  | 188 |
| AAR16344 | 135 | T...R...N   | .SI.HRKF.NTPC-.VYFPRNSTME  | X...PK.DV.H.TR.G..  | 188 |
| ABN80952 | 134 | T...Q...N   | .SI.HRKF.STPC-.VYFPRNSTME  | Q...PN.AV.H.TS.G..  | 187 |
| AAP83917 | 135 | T...Q...N   | .SI.HSKF.NTPC-.VYFPRNSTME  | Q...PN.DV.H.TR.G..  | 188 |
| AAN46470 | 140 | T...R...N   | .SI.HRKF.NTPC-.VYFPRNSTME  | Q...AN.DV.H.PSQGI.. | 193 |
| AAO76075 | 135 | T...Q...X   | .SI.HSKF.NTPC-.VYFPRNSTME  | Q...PN.DV.H.TR.G..  | 188 |
| AAL18096 | 133 | T...Q...N   | .SI.HRKF.NTPC-.VYFPRNSTME  | Q...PN.DV.H.TG.G..  | 186 |
| AAV32574 | 135 | T...R...N   | .SI.HRKF.NTPC-.VYFPRNSTME  | Q...PN.DV.H.TG..    | 188 |
| AAN46468 | 140 | T...R...N   | .SI.HRKF.NTPC-.VYFPRNSTME  | Q...AN.DV.H.PSQGI.. | 193 |
| CAE53113 | 135 | T...R...N   | .SI.HRKF.STPC-.VYFPRNSTME  | Q...PN.DV.H.PS.G..  | 188 |
| AAR16394 | 138 | T...Q...N   | .SI.HRKF.NTPC-.VYFPRNSTME  | Q...PN.DV.H.TR.GA.. | 191 |
| AAL18153 | 134 | T...Q...N   | .RSI.HRKF.NTPC-.VYFPRNSTME | Q...PN.DV.H.TR.G..  | 187 |
| ABN80956 | 135 | T...Q...N   | .SI.HRKF.NTAC-.VYFPRNSTME  | Q...PN.AV.H.TR.G..  | 188 |
| AAP03677 | 135 | T...R...N   | .SI.HRKF.NTPC-.VYFPRNSTME  | Q...PD.DV.R.TS.G..  | 188 |
| ABO65655 | 74  | T...R...N   | .SI.HRKF.NTPC-.VYFPRNSTME  | Q...PN.VV.H.TS.G..  | 127 |
| CAE53123 | 135 | T...Q...N   | .SI.HRKF.NTPC-.VYFPRNSTME  | Q...PN.AV.H.TS.G..  | 188 |
| AAL18116 | 135 | T...L...N   | .RSIHRKF.NTPC-.VYFPRNSTME  | Q...PD.DV.H.AR.G..  | 188 |
| AAV32568 | 135 | T...R...N   | .SI.HRKF.NTPC-.VYFPRNSTME  | Q...PN.DV.H.TG..    | 188 |
| AAO76049 | 121 | T...Q...N   | .SI.HSKF.NTPC-.VYFPRNSTME  | Q...PN.DV.H.TR.G..  | 174 |
| AAP83901 | 135 | T...R...N   | .SI.HRKF.NTPC-.VYFPRNSTME  | Q...PN.EV.H.TT.G..  | 188 |
| AAV32573 | 135 | T...R...N   | .SI.HRKF.NTPC-.VYFPRNSTME  | Q...PN.DV.H.TG..    | 188 |
| AAR16417 | 135 | T...Q...N   | .RSI.HRKF.NTPC-.VYFPRNSTME | Q...PN.DV.H.SR.G..  | 188 |
| ABF01024 | 135 | T...Q...N   | .SI.HSKF.NTPC-.VYFPRNSTME  | Q...PN.DV.H.TR.G..  | 188 |
| AAV93930 | 92  | T...R...N   | .SI.HRKF.NTPC-.VYFPRNSTME  | Q...D.DV.Y.TS.G..   | 145 |
| AAV32566 | 135 | T...R...N   | .SI.HRKF.NTPC-.VYFPRNSTME  | Q...PN.DV.H.TG..    | 188 |
| AAV32567 | 135 | T...R...N   | .SI.HRKF.NTPC-.VYFPRNSTME  | Q...PN.DV.H.TG..    | 188 |
| AAV32570 | 135 | T...R...N   | .SI.HRKF.NTPC-.VYFPRNSTME  | Q...PN.DV.H.TG..    | 188 |
| ABD24378 | 135 | T...Q...N   | .RSI.HRKF.NTPC-.VYFPRNSTME | Q...PN.DV.H.TR.G..  | 188 |
| AAO76052 | 135 | T...Q...N   | .SI.HSKF.NTPC-.VYFPRNSTME  | Q...PN.DV.H.TR.GI.. | 188 |
| AAO76050 | 135 | T...Q...N   | .SI.HSKF.NTPC-.VYFPRNSTME  | Q...PN.DV.H.TR.G..  | 188 |
| AAO76061 | 135 | T...Q...N   | .SI.HSKF.NTPC-.VYFPRNSTME  | Q...SN.DV.H.TR.G..  | 188 |
| AAV32558 | 135 | T...Q...N   | .I.HRKF.NTPC-.VYFPRNSTME   | Q...PN.DV.H.TG..    | 188 |
| CAE53132 | 135 | T...R...N   | .SILHRKF.NTPC-.VYFPRNSTME  | Q...PK.DV.H.TS.G..  | 188 |
| AAV32562 | 135 | T...Q...N   | .I.HRKF.NTPC-.VYFPRNSTME   | Q...PN.DV.H.TG..    | 188 |
| ABF01040 | 135 | T...Q...N   | .SI.HSKF.NTPC-.VYFPRNSTME  | K...PN.DV.H.TRKG..  | 188 |
| AAV32560 | 135 | T...R...N   | .SI.HRKF.NTPC-.VYFPRNSTME  | Q...PN.DV.H.TG..    | 188 |
| AAP83912 | 136 | T...R...N   | .SI.HRKF.NTPC-.VYFPRNSTME  | Q...PN.DV.R.TR.G..  | 189 |
| AAR16363 | 135 | T...R...N   | .SI.HRKF.NTPC-.VYFPRNSTME  | Q...PK.DV.HITR.G..  | 188 |
| AAL18127 | 135 | T...Q...N   | .RSI.HRKF.NTPC-.VYFPRNSTME | Q...PN.DV.H.TR.G..  | 188 |
| ABO65672 | 89  | T...R...N   | .SI.HRKF.NTPC-.VYFPRNSTME  | Q...PK.VV.H.TS.G..  | 142 |
| AAL18147 | 135 | T...R...N   | .SI.HRKF.NTPC-.VYFPRNSTME  | Q...XPN.GV.H.TROG.. | 188 |
| AAV32555 | 135 | T...Q...N   | .I.HRKF.NTPC-.VYFPRNSTME   | Q...PN.DV.H.TG..    | 188 |
| AAL18128 | 135 | T...Q...N   | .RSI.HRKF.NTPC-.VYFPRNSTME | Q...PN.DV.H.TR.G..  | 188 |
| AAR16340 | 135 | T...Q...N   | .SI.HRKF.NTPC-.VYFPRNSTME  | Q...PN.DV.H.TK.G..  | 188 |
| ABO65664 | 76  | T...R...N   | .SI.HRKF.NTPC-.VYFPRNSTME  | Q...PN.VV.H.TS.G..  | 129 |
| AAR16386 | 135 | T...Q...N   | .RSI.HRKF.NTPC-.VYFPRNSTME | Q...PN.DV.H.TR.G..  | 188 |
| ABN50184 | 92  | T...R...N   | .SI.HRKF.NTPC-.VYFPRNSTME  | Q...PN.DV.H.TS..    | 145 |
| ABF22640 | 131 | T.X...R...N | .SI.HRKF.NAPC-.VYFPRNSTME  | Q...PN.DV.HATS.G..  | 184 |
| AAV32556 | 135 | T...Q...N   | .I.HRKF.NTPC-.VYFPRNSTME   | Q...PN.DV.H.TG..    | 188 |
| AAL18121 | 135 | T...R...N   | .SI.HRKF.NTPC-.VYFPRNSTME  | Q...PN.DV.R.TS.G..  | 188 |
| AAR16345 | 135 | T...Q...N   | .SI.HRKF.NTPC-.VYFPRNSTME  | Q...PN.DV.X.TR.G..  | 188 |
| ABN50141 | 92  | T...R...N   | .SI.HRKF.NTPC-.VYFPRNSTME  | Q...PN.DV.H.TSQG..  | 145 |
| AAV32571 | 135 | T...R...N   | .SI.HRKF.NTPC-.VYFPRNSTME  | Q...PN.DV.H.TG..    | 188 |
| AAR16381 | 135 | T...R...N   | .SI.HRKF.NTPC-.VYFPRNSTME  | Q...PN.DV.HVTR.G..  | 188 |
| ABA01046 | 135 | T...R...N   | .SI.HRKF.NTPC-.VYFPRNSTME  | Q...PN.NV.HATR.G..  | 188 |
| AAP83907 | 135 | T...Q...N   | .SI.HSKF.NTPC-.VYFPRNSTME  | Q...PN.DV.Y.TR.G..  | 188 |
| AAP83916 | 135 | T...IR...N  | .SI.HRKF.NTPC-.VYFPRNSTME  | Q...PN.DV.H.TT.G..  | 188 |
| AAR16389 | 135 | T...R...N   | .SI.HRKF.NTPC-.VYFPRNSTME  | Q...PN.DV.H.TQ.G..  | 188 |
| ABA01047 | 135 | T...R...N   | .SI.HRKF.NTPC-.VYFPRNSTME  | Q...PN.NV.HATR.G..  | 188 |
| AAV32582 | 135 | T...R...N   | .SI.HRKF.NTPC-.VYFPRNSTME  | Q...PN.DV.H.TG..    | 188 |
| ABO65653 | 89  | T...R...N   | .SI.HRKF.NTPC-.VYFPRNSTME  | Q...PN.VV.H.TS.G..  | 142 |
| AAV32557 | 135 | T...Q...N   | .I.HRKF.NTPC-.VYFPRNSTME   | Q...PN.DV.H.TG..    | 188 |
| AAL18151 | 130 | T...R...N   | .SI.HRKF.NTPC-.VYFPRNSTME  | Q...PN.DV.H.TT.G..  | 183 |
| AAL18097 | 135 | T...Q...N   | .SI.HRKF.NTPC-.VYFPRNSTME  | Q...PN.DV.H.TK.G..  | 188 |
| ABA29190 | 90  | T...R...N   | .SIIHRKF.NTPC-.VYFPRNSTME  | Q...RN.DV.H.TSQG..  | 143 |
| ABC84843 | 135 | T...R...N   | .XI.HRKF.NTPC-.VYFPRNSTME  | Q...PN.DV.H.TS.GI.. | 188 |
| CAE53133 | 135 | T...Q...N   | .SI.HRKF.NTPC-.VYFPRNSTME  | Q...PN.AV.HATR.G..  | 188 |
| AAO76059 | 135 | T...Q...N   | .SI.HSKY.NTPC-.VYFPRNSTME  | H...PN.DV.H.TR.G..  | 188 |

|          |     |                                       |                      |     |
|----------|-----|---------------------------------------|----------------------|-----|
| AAR16392 | 135 | T....Q...N..SI.HGKF.NTLC-.VYFPRNSAME  | Q...PN.DV.H.AR.G..   | 188 |
| AAR16369 | 135 | T....Q...N.RSI.HRKF.NTLC-.VYFPRNSTME  | Q...PN.DV.H.TR.G..   | 188 |
| AAPO3674 | 135 | T....R...N..SI.HRKF.NTPC-.VYFPRNSMME  | Q...PN.DV.HITS.G..   | 188 |
| ABA29189 | 90  | T....R...N..I.HRKF.NTPC-.VYFPRNSTMD   | Q...QN.DV.H.TSQG..   | 143 |
| AAV32580 | 135 | T....R...N..SI.HRKFNDTPC-.VYFPRNSTME  | Q...PN.DV.H.TG...G.. | 188 |
| AAR16338 | 135 | T....R...N..SI.HRKF.NNLC-.VYFPRNSTME  | Q...PN.DV.R.TS.G..   | 188 |
| ABA29188 | 90  | T....R...N..I.HRKF.NTPC-.VYFPRNSTMD   | Q...QN.DV.H.TSQG..   | 143 |
| ABA01036 | 135 | T....R...N..SI.HRKF.STPC-.VYFPRNSTMK  | Q...PN.NV.HATS.G..   | 188 |
| AAP83898 | 135 | T....Q...N..SI.HSKF.NTLC-.VYFPRNSTME  | Q...PN.DV.H.XR.G..   | 188 |
| AAPO3667 | 135 | T....Q...N..SI.HRKF.NTPC-.VYFPRNSMME  | K...QN.DV.HMNTS.G..  | 188 |
| AAV32561 | 135 | T....R...N..SI.HRKFNDTPC-.VYFPRNSTME  | Q...PN.DV.H.TG...G.. | 188 |
| AAV32578 | 135 | T....R...N..SI.HRKFNDTPC-.VYFPRNSTME  | Q...PN.DV.H.TG...G.. | 188 |
| ABA01035 | 135 | T....R...N..SI.HRKF.STPC-.VYFPRNSTMK  | Q...PN.NV.HATS.G..   | 188 |
| AAL18119 | 135 | T....Q...N.RSI.HRKF.NTLC-.VYFPRNSTME  | K...PN.DV.HPTR.G..   | 188 |
| ABA01038 | 135 | T....R...N..SI.HRKF.STPC-.VYFPRNSTMK  | Q...PN.NV.HATS.G..   | 188 |
| ABA01037 | 135 | T....R...N..SI.HRKF.STPC-.VYFPRNSTMK  | Q...PN.NV.HATS.G..   | 188 |
| ABA01039 | 135 | T....R...N..SI.HRKF.STPC-.VYFPRNSTMK  | Q...PN.NV.HATS.G..   | 188 |
| AAV32579 | 135 | T....R...N..SI.HRKFNDTPC-.VYFPRNSTME  | Q...PN.DV.H.TG...G.. | 188 |
| AAS18345 | 135 | T....R...N..SI.HRKF.NTLC-.VYFPRNSTMD  | Q...PN.DV.H.TK.G..   | 188 |
| ABO65674 | 91  | T....R...N..SI.HTKF.NTPC-.VYFPRNSTME  | Q...PN.VV.H.TS.G..   | 144 |
| AAPO3675 | 135 | T....R...N..SI.HRKF.NTPC-.VYFPRNSTME  | E...PN.NV.HITS.G..   | 188 |
| ABN80975 | 135 | T....R...N..SI.HRKF.NTLC-.VYFPRNSTMD  | Q...PN.DV.H.TK.G..   | 188 |
| AAS18344 | 135 | T....R...N..SI.HRKF.NTLC-.VYFPRNSTMD  | Q...PN.DV.H.TK.G..   | 188 |
| AAS18346 | 135 | T....R...N..SI.HRKF.NTLC-.VYFPRNSTMD  | Q...PN.DV.H.TK.G..   | 188 |
| AAQ76056 | 134 | T....Q...N..SI.HSKY.NTPC-.VYFPRNSTME  | Q...PN.DV.HATR.G..   | 187 |
| ABO65661 | 91  | T....R...N..SISHRKF.NTPC-.VYFPRNSTME  | Q...PN.VV.H.TS.G..   | 144 |
| AAL18156 | 135 | T....Q...N..SI.HSKF.NTLC-.VYFPRNSTMQ  | Q...PN.DV.H.TK.G..   | 188 |
| AAS18347 | 135 | T....R...N..SI.HRKF.NTLC-.VYFPRNSTMD  | Q...PN.DV.H.TK.G..   | 188 |
| ABA01042 | 135 | T....R...N..SI.HRKF.STPC-.VYFPRNSTMK  | Q...PN.NV.HATS.G..   | 188 |
| AAQ76071 | 135 | T....Q...N..SI.HSKF.NTLC-.VYFPRNSTME  | Q...PN.DV.HATR.G..   | 188 |
| ABC84836 | 135 | T....R...N..SI.HRKF.NTLC-.VYFPRNSTME  | Q...PN.EV.H.T.G..    | 188 |
| ABC84839 | 135 | T....R...N..SI.HRKY.NNLC-.VYFPRNSTME  | Q...PN.DV.H.TS.G..   | 188 |
| AAPO3688 | 135 | T....R...N..GX.HRKF.NTPC-.VYFPRNSTME  | K...PN.DV.HITS.G..   | 188 |
| AAP83913 | 135 | T....R...N.XSI.HRKF.NTLC-.VYFPRNSTME  | Q...PN.DV.H.TR.G..   | 188 |
| AAR16408 | 135 | T....R...N..SI.HRKY.NNLC-.VYFPRNSTME  | Q...PN.DV.H.TS.G..   | 188 |
| AAL18112 | 135 | T....R...N..SI.HRKF.NTLC-.VYFPRNST.E  | Q...PN.DV.H.TT.G..   | 188 |
| AAR16378 | 136 | ...Q...N..SI.HRKF.NTLC-.VYFPRNSTME    | Q...PN.EV.N.TR.G..   | 188 |
| AAV32564 | 135 | T....R...N..SI.HRKFNDTPC-.VYFPRNSTME  | R...PN.DV.H.TG...G.. | 188 |
| AAR16377 | 135 | T....Q...N.RSI.HRKF.NTLC-.VYFPRNSTME  | K...PN.DV.HPTR.G..   | 188 |
| AAV32049 | 135 | TV...R...N..SI.QRKF.NNLC-.VYFPRNSTME  | Q...PN.DV.HNTR.G..   | 188 |
| AAV32058 | 135 | T....R...N..SI.HRKF.NTLC-.VYFPRNSTME  | Q...PN.DV.HISRGG..   | 188 |
| ABF22627 | 135 | T....R...N..SI.HRKF.NAP-X.VYFPRNSTME  | Q...PB.DV.HAAS.G..   | 188 |
| AAL18094 | 135 | T....Q...N..SI.HRKF.NTLC-.VYFPRNSTME  | Q...PN.DV.C.TK.G..   | 188 |
| AAQ76074 | 135 | T....Q...N..SI.HSKF.NTLC-.VYFPRNSTMQ  | Q...PN.DV.H.TR.G..   | 188 |
| ABA01030 | 135 | T....R...N..SI.QRKF.STPC-.VYFPRNSTMK  | Q...PN.SV.H.TS.G..   | 188 |
| AAQ76082 | 135 | T....Q...N..SI.HNKF.NTLC-.VYFPRNSTMQ  | Q...PN.DV.H.TR.G..   | 188 |
| AAL18134 | 135 | T....Q...N..SI.HGKF.NTLC-.VYFPRNSAME  | Q...SN.DV.H.AR.G..   | 188 |
| AAV32048 | 135 | TV...R...N..SI.QRKF.NNLC-.VYFPRNSTME  | Q...PN.DV.HNTR.G..   | 188 |
| ABA01044 | 135 | T....R...N..SI.HRKF.STPC-.VYFPRNSTMK  | Q...PN.NV.HATS.G..   | 188 |
| AAL18155 | 134 | T....Q...N..SI.HSKF.NTLC-.VYFPRNSTME  | Q...PN.NV.H.TR.G..   | 187 |
| CAE53124 | 135 | T....Q...N..SI.HRKF.NTAC-.VYFPRNSTME  | Q...PN.AV.H.TR.G..   | 188 |
| ABA01050 | 135 | T....R...N..SI.HRKF.STPC-.VYFPRNSTMK  | Q...PN.NV.HATS.G..   | 188 |
| AAL18149 | 135 | T....Q...N..SI.HSKF.NTPC-.VYFPRNSTME  | X...PN.DV.H.TRXG..   | 188 |
| AAQ76068 | 135 | T....Q...N..SI.HSKF.NTLC-.VYFPRNSTME  | Q...PN.DV.H.TK.G..   | 188 |
| AAR16393 | 136 | ...Q...N..SI.HRKF.NTLC-.VYFPRNSTME    | Q...PN.EV.N.TR.G..   | 188 |
| ABA01032 | 135 | T....R...N..SI.HRKF.STPC-.VYFPRNSTMK  | Q...PN.NV.HATS.G..   | 188 |
| AAQ76058 | 135 | T....Q...N..SI.HSKF.NTLC-.VYFPRNSTMX  | Q...PN.DV.H.TR.G..   | 188 |
| ABA01040 | 135 | T....R...N..SI.HRKF.STPC-.VYFPRNSTMK  | Q...PN.NV.HATS.G..   | 188 |
| AAS18356 | 135 | T....R...N..SI.HRKF.NNPC-.VYFPRNSTMD  | Q...PN.DV.H.TX...G.. | 188 |
| ABF01023 | 135 | T....IQ...N..SI.HSKF.NTLC-.VYFPRNSTME | Q...PN.DV.H.TR.G..   | 188 |
| AAQ76064 | 135 | T....Q...N..SI.HSKY.NTLC-.VYFPRNSTME  | Q...PN.DV.H.TR.G..   | 188 |
| AAR16380 | 135 | TV...R...N..SI.HRKY.NTLC-.VYFPRNSTME  | Q...PN.DV.H.TS.G..   | 188 |
| AAQ76073 | 135 | T....Q...N..SI.HSKY.NTLC-.VYFPRNSTME  | Q...PN.DV.H.TR.G..   | 188 |
| ABF22648 | 135 | T....R...N..SI.HRKF.NIP-Y.VYFPRNSTME  | Q...PN.NV.H.TSQG..   | 188 |
| AAPO3653 | 133 | T....R...N..SI.HRKF.NTPC-.VYFPRNST.E  | Q...PK.VV.H.TS.G..   | 186 |
| ABR26565 | 135 | T....R...N..SI.HRKF.NTLC-.VYFPRNSTME  | Q...PN.DV.R.TT.G..   | 188 |
| CAE53125 | 135 | T....Q...N..SI.HRKF.NTAC-.VYFPRNSTME  | Q...PN.AV.H.TR.G..   | 188 |
| ABF01039 | 135 | T....Q...N..SI.HSKF.NTPC-.VYFPRNSTME  | X...PN.DV.H.TRXG..   | 188 |
| ABA01028 | 135 | T....R...N..SI.QRKF.STPC-.VYFPRNSTMK  | Q...PN.SV.H.TS.G..   | 188 |
| ABO65648 | 89  | T....R...N..SI.HRKF.NTPC-.VYFPRNST.E  | Q...PK.VV.H.TS.G..   | 142 |
| ABA01033 | 135 | T....R...N..SI.HRKF.STPC-.VYFPRNSTMK  | Q...PN.NV.HATS.G..   | 188 |
| AAV32563 | 135 | T....Q...N..I.HRKFNDTPC-.VYFPRNSTME   | Q...PN.DV.HATR.G..   | 188 |
| ABN50188 | 92  | T....R...N..GX.HRKF.NTPC-.VYFPRNSTME  | K...PN.DV.HITS.G..   | 145 |
| AAR16352 | 135 | T....R...YN..SI.HRKF.NTLC-.VYFPRNSTME | H...SN.DV.R.TS.G..   | 188 |
| ABC84834 | 135 | T....R...N..SI.HSKF.NTLC-.VYFPRNSTME  | Q...PN.DV.H.TSQG..   | 188 |
| AAL18125 | 135 | T....Q...N..SI.HSKY.NTLC-.VYFPRNSTME  | Q...PN.DV.H.AR.G..   | 188 |
| AAD34965 | 134 | TV...R...N..SI.HRKY.NTLC-.VYFPRNSTME  | Q...PN.DV.H.TS.G..   | 187 |
| ABA01029 | 135 | T....R...N..SI.QRKF.STPC-.VYFPRNSTMK  | Q...PN.SV.H.TS.G..   | 188 |
| ABO65645 | 91  | T....R...N..SI.HRKF.NAPC-.VYFPRNST.E  | Q...PN.DV.HAXSXG..   | 144 |
| ABA01019 | 135 | T....R...N..SI.HRKF.STPC-.VYFPRNSTMK  | K...SN.DV.H.TSHG..   | 188 |
| ABF01026 | 135 | T....Q...N..SI.HSKY.NTLC-.VYFPRNSTME  | Q...PN.DV.H.TR.G..   | 188 |
| AAP83906 | 135 | T....Q...N..SI.HGKF.NTLC-.VYFPRNSTME  | Q...PN.DV.L.AR.G..   | 188 |
| ABA01015 | 135 | T....R...N..SI.HRKF.STPC-.VYFPRNSTMK  | K...SN.DV.H.TSHG..   | 188 |
| ABA01049 | 135 | T....R...N..SI.HRKF.STPC-.VYFPRNSTMK  | Q...PN.NV.HAXS.G..   | 188 |
| ABA01043 | 135 | T....R...N..SI.HRKF.STPC-.VYFPRNSTMK  | Q...PN.V.HATS.G..    | 188 |
| AAQ76076 | 135 | T....Q...N..SI.HSKY.NTLC-.VYFPRNSTME  | Q...PN.DV.H.TR.G..   | 188 |
| AAQ76051 | 135 | T....Q...N..SI.HSKF.NTLC-.VYFPRNSTMD  | Q...PN.DV.H.SRQG..   | 188 |
| AAV32572 | 135 | T....Q...N..SI.HRKFNDTPC-.VYFPRNST.E  | Q...PN.DV.H.TG...G.. | 188 |
| AAR16410 | 135 | T....R...N..SI.QRKF.NTLC-.VYFPRNST.E  | Q...PN.GV.H.TSQG..   | 188 |
| AAR16342 | 135 | T....R...N..SI.HRKFNDTPC-.VYFPRNSTME  | Q...PN.DV.HATT.G..   | 188 |
| AAR16364 | 132 | T....R...N..SI.HRKF.NTLC-.VYFPRNSTME  | Q...PN.DV.H.T.G..    | 184 |
| AAL18100 | 135 | T....Q...N..SI.HRKF.NTLC-.VYFPRNSTAKE | Q...SN.DV.H.IR.G..   | 188 |
| ABA01031 | 135 | T....R...N..SI.HRKF.STPC-.VYFPRNSTMK  | Q...PN.NV.HATS.G..   | 188 |
| AAV32577 | 135 | T....R...N..SI.HRKFNDTPC-.VYFPRNSTME  | Q...PN.NV.H.TG...G.. | 188 |
| AAV32575 | 135 | T....R...N..SI.HRKFNDTPC-.VYFPRNSTME  | Q...PN.NV.H.TG...G.. | 188 |
| AAV32569 | 135 | T....R...N..SI.HRKFNDTPC-.VYFPRNSTMD  | Q...PN.DV.H.TG...G.. | 188 |
| CAE53128 | 135 | T....Q...N..SI.HRKF.XXPC-.VYFPRNSTME  | Q...PN.AV.H.TR.G..   | 188 |
| AAR16366 | 135 | T....Q...N.RSI.HRKF.NTLC-.VYFPRNSTME  | Q...PK.DV.HPTR.G..   | 188 |
| ABN50176 | 92  | TX...R...N..SI.HRKF.NTPC-.VYFPRNSTME  | Q...PD.DV.R.TS.G..   | 145 |
| ABC84840 | 135 | T....R...N..SI.HRKY.NNLC-.VYFPRNSTME  | Q...PN.DV.H.TI.G..   | 188 |
| AAL18106 | 135 | T....Q...N..SI.HRKF.NTLC-.VYFPRNSTME  | Q...PN.NV.H.TRXG..   | 208 |
| ABN50178 | 92  | T....R...N..SI.HRKF.NTPC-.VYFPRNSTME  | Q...PN.VV.H.TS.G..   | 145 |
| AAD34952 | 140 | T....R...N..SI.HRKF.NALC-.VYFPRNSTME  | Q...PN.AV.HPTC.G..   | 193 |

|          |     |             |                            |                      |     |
|----------|-----|-------------|----------------------------|----------------------|-----|
| AAL18158 | 135 | T....Q...N  | RSI.HRKF.NTLC-.VYFPRNSTME  | Q...PN.DV.C.TR.G..   | 188 |
| AAR16383 | 134 | T....R...N  | .SI.HSKY.NTLC-.VYFPRNSTME  | Q...PN.DV.H.IR.G..   | 187 |
| AAQ76053 | 134 | T....Q...N  | .SI.HSKY.NTPC-.VYFPRNSTME  | Q...PN.DV.HATR.XG..  | 187 |
| ADD34957 | 140 | T....R...N  | .SI.HRKF.NTLC-.VYFPRNSTME  | Q...AN.DV.HAPS.GL.   | 193 |
| ABN50190 | 92  | TV...R...N  | .SI.HRKF.NAPC-.VYFPRNSAME  | Q...PD.DV.RATS.G..   | 145 |
| ABQ65668 | 89  | T....R...N  | .SI.HRKF.NTPC-.VYFPRYSTIE  | Q...PN.VV.H.TS.G..   | 142 |
| ABA01048 | 135 | T....R...X  | .SI.HRKF.STPC-.VYFPRNSTMK  | Q...PN.VV.HATR.G..   | 188 |
| ABA01013 | 135 | T....R...N  | .SI.HRKF.STPC-.VYFPRSSSTMK | K...PN.NV.H.TSHG..   | 188 |
| ABA01014 | 135 | T....R...N  | .SI.HRKF.STPC-.VYFPRSSSTMK | K...PN.NV.H.TSHG..   | 188 |
| AAD34963 | 135 | T....R...QN | .SI.HRKF.NTLC-.VYFPRNSTMK  | Q...PN.DV.H.TS.G..   | 188 |
| AAN46466 | 140 | T....R...N  | .SI.HRKF.NTLC-.VYFPRNSTME  | Q...AN.DV.HAPS.GL.   | 193 |
| AAP83896 | 135 | T....R...N  | .SI.HRKF.NTLC-.VYFPRNSTME  | Q..APN.DV.R.TR.G..   | 188 |
| ABA01041 | 135 | T....R...N  | .SI.HRKF.STPC-.VYFPRNSTMK  | Q...PN.NV.HATI.G..   | 188 |
| AAL18110 | 135 | T....R...N  | .SI.HRKF.NTLC-.VYFPRNSTMK  | Q...PN.DV.RIAA.G..   | 188 |
| ABQ65641 | 91  | TV...R...N  | .SI.HRKF.NTLC-.VYFPRNSTME  | Q...PN.VV.H.TS.G..   | 144 |
| AAV32581 | 135 | T....R...N  | .SI.HRKFNDTLC-.VYFPRNSTME  | Q...PN.DV.H.SG..     | 188 |
| AAK20255 | 134 | T....Q...N  | .SI.HSKY.NTLC-.VYFPRNSTME  | Q...PN.DV.H.MR.G..   | 187 |
| AAL18135 | 135 | T....R...XN | .SI.HRKF.NTPC-.VYFPRNSM.E  | Q...PD.DV.H.TS.G..   | 188 |
| ABA01017 | 135 | T....R...N  | .SI.HRKF.STPC-.VYFPRSSSTMK | K...PN.YV.H.TSHG..   | 188 |
| AAR16382 | 135 | T....Q...N  | RSI.HRKF.NTLC-.VYFPRNSTME  | Q...PK.DV.HPTRQG..   | 188 |
| AAP83894 | 135 | T....R...N  | .SI.HRKF.NTLC-.VYFPRNSTME  | Q...PN.DV.H.--.G.    | 186 |
| ABA01018 | 135 | T....R...N  | .SI.HRKF.ITPC-.VYFPRSSSTMK | K...SN.DV.H.TSHG..   | 188 |
| ABA01026 | 135 | T....R...N  | .SI.HRKF.STPC-.VYFPRNSTMK  | Q...PN.SV.HGTS.G..   | 188 |
| AAQ76070 | 135 | T....Q...N  | .SI.HSKY.NTLC-.VYFPRNSTME  | X...PN.DV.H.TR.G..   | 188 |
| AAQ3681  | 135 | T....R...N  | .GI.HRKF.NTP-.VYFPRNS.IE   | Q...PN.DV.HITSQG..   | 188 |
| AAP83918 | 135 | T....Q...N  | .SI.HSKF.NTLC-.VYFPRNSTME  | Q...PN.HV.H.PR.G..   | 188 |
| ABN80931 | 135 | T....Q...N  | .SIXHRKF.STPC-.VYFPRNSTME  | Q...PN.AV.H.TS.GX.   | 188 |
| ABA01045 | 135 | T....R...N  | .SIXHRKF.STPC-.VYFPRNSTMK  | Q...PN.NV.HATS.G..   | 188 |
| ABA01011 | 136 | T....R...N  | .SI.HRKF.STPC-.VYFPRNGTMK  | Q...PS.DV.RSTS.G..   | 188 |
| AAQ76060 | 135 | T....Q...N  | .SI.HSKY.NTLC-.VYFPRNSTME  | Q...PN.DV.H.TR..     | 188 |
| ABN50145 | 92  | T....R...N  | .GI.HRKF.NTP-.VYFPRNS.IE   | Q...PN.DV.HITSQG..   | 145 |
| ABA01016 | 135 | T....R...N  | .SI.HRKF.STPC-.VYFPRSSSTMK | K...PN.YV.H.TSHG..   | 188 |
| AAS18352 | 135 | T....R...N  | .SI.HRKF.NTPC-.VYFPRXSTMD  | Q...AN.DV.H.TKXG..   | 188 |
| AAR16407 | 135 | T....Q...K  | RSI.HRKF.NTLC-.VYFPRNSTME  | Q...PN.DV.H.TR.G..   | 188 |
| AAS18342 | 135 | T....R...N  | .SI.HRKF.NTPC-.VYFPRNSTMD  | Q...PN.DVXH.TK.GX.   | 188 |
| ABA01023 | 135 | T....R...N  | .SI.QRKF.STPC-.VYFPRNSTIK  | Q...PN.SV.HATS.G..   | 188 |
| ABA01027 | 135 | T..S.R...N  | .SI.QRKF.STPC-.VYFPRNSTMK  | Q...PN.SV.H.TS.G..   | 188 |
| ABA01022 | 135 | T....R...N  | .SI..RKF.STPC-.VYFPRISTMK  | K...N.DV.H.TSHG..    | 188 |
| AAV32576 | 135 | T....R...N  | .SI.HRKFNTPC-.VYFPRNSTME   | Q...PN.NV.H.TXGT..   | 188 |
| ABA01012 | 135 | T....R...N  | .SI.HRKF.STP-.VYFPRNSTMK   | Q...AN.DV.RAAS.G..   | 188 |
| ABA01021 | 135 | T....R...N  | .SI.HRKF.STPC-.VYFPRISTMK  | K...N.NV.H.TSHG..    | 188 |
| AAR16406 | 135 | T....R...N  | .SI.HRKF.NVLC-.VYFPRSSSTME | Q..FPN.DV.HITRQG..   | 188 |
| ABA01024 | 135 | T....R...N  | .SI.HRKF.STPC-.VYFPRNSTMK  | Q...PN.SV.HGTS.G..   | 188 |
| AAL18122 | 135 | T....Q...RN | .SI.HSKY.NTLC-.VYFPRNSTME  | Q...PN.DV.H.TR.G..   | 188 |
| ABN50149 | 92  | T....R...N  | .CI.HRKF.NTPC-.LYFPRNSTME  | Q..Q..PN.DVHRH.T.G.. | 145 |
| ABA01025 | 135 | T....R...N  | .SI.HRKF.STPC-.VYFPRNSIMK  | Q...PN.SV.HGTS.GL.   | 188 |
| ABA01034 | 135 | T....R...N  | .SI.HRKF.STPC-.VYFPRNSTMK  | Q.X..PN.NV.HPTR.GX.  | 188 |
| ABA29173 | 90  | T....R...N  | RSI.HRKF.NTPC-.VYFPRNSTME  | Q...AN.DV.RGTS.G..   | 143 |
| ABN50187 | 92  | T....R...N  | .SI.HRKFRTSC-.VYFPRNSTME   | Q...PN.DV.H.TS.R..   | 145 |
| ADD34961 | 145 | T....Q...N  | .SI.HRKF.STP-.VYFPRNSTME   | Q...SN.NV.HATS.G..   | 188 |
| AAR16409 | 135 | T....R...N  | .SIMHRKF.NTLC-.VYFPRNSTME  | Q...PN.AV.H.IT.R..   | 188 |
| AAQ76079 | 134 | T....Q...N  | .SI.HSKY.NTLC-.VYFPRNSTME  | Q...PN.DV.L.TRKG..   | 187 |
| ABN50088 | 92  | T....Q...N  | .SI.HRKF.STP-.VYFPRNSTME   | Q...SN.NV.HATS.G..   | 145 |
| ADD34953 | 140 | T....R...N  | .SI.HGKF.NALC-.VYFPRNSTAME | Q...PN.AV.R.AR.G..   | 193 |
| ABA01020 | 135 | T....R...N  | .SI.HRKF.STPC-.VYFPRSSSTMK | K...PN.YX.H.TSHG..   | 188 |
| AAL18123 | 135 | T....Q...N  | RSI.HRKF.NTLC-.VYFPRNSTME  | Q...K.NV.HPTR.G..    | 188 |
| ABF22645 | 135 | TT...R...N  | .SI.HRKF.NIPC-.VYFPRNSTME  | Q...PK.DV.C.TS.RL.   | 188 |
| AAQ93931 | 102 | T....R...N  | .SI.HRKF.NTPC-.VYFPRNSTME  | Q...PD.DV.H.AS.G..   | 155 |
| CAE53136 | 135 | T....Q...N  | .SI.HRKLXXPC-.VYFPRNSTME   | Q...PN.AV.H.TR.G..   | 188 |
| AAQ76066 | 134 | T....Q...N  | .SI.HSKY.NTLC-.VYFPRNSTME  | Q...PN.DV.H.IRGG..   | 187 |
| AAK93936 | 102 | T....R...N  | .SI.HRKF.NAPC-.VYFPRNSTME  | Q...PN.DV.H.TS.G..   | 155 |
| AAK93939 | 102 | T....R...N  | .SI.HRKF.NAPC-.VYFPRNSTME  | Q...PN.DV.H.TS.G..   | 155 |
| AAK93932 | 102 | T....R...N  | .SI.HRKF.NTPC-.VYFPRNSTME  | Q...PD.DV.H.TS.G..   | 155 |
| AAK93925 | 102 | T....R...N  | .SI.HRKF.NTPC-.VYFPRNSTME  | Q...PD.DV.H.TS.G..   | 155 |
| AAK93934 | 102 | T....R...N  | .SI.HRKF.NTPC-.VYFPRNSTME  | Q...PD.DV.H.TS.G..   | 155 |
| AAK93928 | 102 | T....R...N  | .SI.HRKF.NTPC-.VYFPRNSTME  | Q...PD.DV.H.TS.G..   | 155 |
| AAK93940 | 102 | T....R...N  | .SI.HRKF.NAPC-.VYFPRNSTME  | Q...PD.DV.H.TS.G..   | 155 |
| AAK93937 | 102 | T....R...N  | .SI.HRKF.NTPC-.VYFPRNSTME  | Q...PD.DV.H.TS.G..   | 155 |
| AAK93926 | 102 | T....R...N  | .SI.HRKF.NTPC-.VYFPRNSTME  | Q...PD.DV.HATS.G..   | 155 |
| AAK93933 | 102 | T....R...N  | .SI.HRKF.NTPC-.VYFPRNSTME  | Q...D.DV.H.TS.G..    | 155 |
| ABS81428 | 107 | T....R...N  | .SI.HRKF.NTP-YKVCFSRNSTKE  | QR..PN.DV.C.TRQG..   | 160 |
| AAP83922 | 135 | T....R...N  | RSI.HRKF.NTLC-.VYFPRNSTKE  | Q...PN.DV.H.TR.GD.   | 188 |
| ABF22647 | 131 | T....R...D  | .SI.HRKF.NTP-YKVCFSRNSTKE  | QR..PN.DV.H.TRQG..   | 184 |
| ABF22644 | 134 | T....Q...N  | .SI..RKF.NTA-.VYFPRNSTME   | Q..GPD.GV.H.TQQG..   | 187 |
| ABS81427 | 107 | T....R...D  | .SI.HRKF.NTP-YKVCFSRNSTKE  | QR..PN.DV.H.TRQG..   | 160 |
| ABF22643 | 134 | T....Q...N  | .SI..SKF.HTA-.VYFPRNSTME   | Q..APN.DV.H.AQQG..   | 187 |
| ABA19433 | 107 | T....R...D  | .SI.HRKF.NTP-YKVCFSRNSTKE  | QR..PN.DV.H.TCQG..   | 160 |
| ABA19434 | 107 | T....R...D  | .SI.HRKF.NTP-YKVCFSRNSTKE  | QR..PN.DV.H.TCQG..   | 160 |
| ABA19438 | 107 | T....R...D  | .SI.HRKF.NTP-YKVCFSRNSTKE  | QR..PN.DV.H.TCQG..   | 160 |
| ABA19436 | 107 | T....R...D  | .SI.HRKF.NTP-YKVCFSRNSTKE  | QR..PN.DV.H.TCQG..   | 160 |
| ABA19416 | 107 | T....R...D  | .SI.HRKF.NTP-YKVCFSRNSTKE  | QR..PN.DV.H.TCQG..   | 160 |
| ABA19417 | 107 | T....R...D  | .SI.HRKF.NTP-YKVCFSRNSTKE  | QR..PN.DV.H.TCQG..   | 160 |
| ABA19439 | 107 | T....R...D  | .SI.HRKF.NTP-YKVCFSRNSTKE  | RR..PN.DV.H.TCQG..   | 160 |
| ABA19443 | 108 | T....R...D  | .SI.HRKF.NTP-YKVCFSRNSTKE  | QR..PN.DV.H.TRQG..   | 160 |
| ABA19444 | 107 | T....R...D  | .SI.HRKF.NTP-YKVCFSRNSTKE  | QR..PD.DV.H.TC.G..   | 160 |
| AAK93935 | 102 | T....R...N  | .SI.HRKFNTPC-.VYFPRNSTME   | Q...PD.DV.R.TS.G..   | 155 |
| ABA19420 | 108 | T....R...D  | .NI.HRKF.NTP-YKVCFSRNSTKE  | QR..PN.DV.H.TCQG..   | 160 |
| ABA19429 | 108 | T....R...D  | .NI.HRKF.NTP-YKVCFSRNSTKE  | QR..PN.DV.H.TCQG..   | 160 |
| ABA19418 | 108 | T....R...D  | .NI.HRKF.NTP-YKVCFSRNSTKE  | QR..PN.DV.H.TCQG..   | 160 |
| ABA19430 | 108 | T....R...D  | .NI.HRKF.NTP-YKVCFSRNSTKE  | QR..PN.DV.H.TCQG..   | 160 |
| ABA19415 | 108 | T....R...D  | .NI.HRKF.NTP-YKVCFSRNSTKE  | QR..PN.DV.H.TCQG..   | 160 |
| ABA19425 | 108 | T....R...D  | .NI.HRKF.NTP-YKVCFSRNSTKE  | QR..PN.DV.H.TCQG..   | 160 |
| ABA19432 | 108 | T....R...D  | .NI.HRKF.NTP-YKVCFSRNSTKE  | QR..PN.DV.H.TCQG..   | 160 |
| ABA19419 | 108 | T....R...D  | .NI.HRKF.NTP-YKVCFSRNSTKE  | QR..PN.DV.H.TCQG..   | 160 |
| ABA19435 | 107 | T....R...D  | .SI.HRKF.NTP-YKVCFSRNSTKE  | QR..N.DV.H.TCQG..    | 160 |
| ABA19440 | 107 | T....R...D  | .SI.HRKF.NTP-YKVCFSRNSTKE  | QR..PN.DV.HITCQG..   | 160 |
| ABA19442 | 108 | T....R...D  | .SI.HRKF.NTP-YKVCFSRNSTKE  | QR..PN.DV.H.TCQG..   | 160 |
| ABA19423 | 108 | T....R...D  | .SI.HRKF.NTP-YKVCFSRNSTKE  | QR..PN.DV.H.TCQG..   | 160 |
| ABA19441 | 107 | T....R...D  | .SI.YRKF.NTP-YKVCFSRNSTKE  | RR..PN.DV.H.TCQG..   | 160 |
| ABA19414 | 107 | T....Q...D  | .GI.HRKF.NTP-YKVCFSRNSTKE  | QR..SN.DV.H.TCQG..   | 160 |
| ABA19428 | 108 | T....R...D  | .SI.HRKF.NTP-YKVCFSRNSTKE  | QR..PN.DV.H.TCQG..   | 160 |
| ABA19427 | 108 | T....R...D  | .SI.HRKF.NTP-YKVCFSRNSTKE  | QR..PN.DV.H.TWQG..   | 160 |
| ABS81425 | 107 | T....R...D  | .SI.HRKF.NA-YKVCFSRNSTKE   | QR..PN.EV.H.TRQR..   | 160 |

|                 |     |              |                          |                     |     |
|-----------------|-----|--------------|--------------------------|---------------------|-----|
| <b>ABA19431</b> | 108 | ....R...D..  | SI.HRKF.NTP-YKVCFSRNSMKE | .QC..PN.DV.H.TCQG.. | 160 |
| <b>ABA19421</b> | 108 | ....R...D..  | SI.HRKF.NTP-YKVCFSRNSMKE | .QR..PN.DV.H.TCQG.. | 160 |
| <b>ABA19426</b> | 108 | ....R...D..  | NI.HRKF.NTP-YKVCFSR.STKE | .QR..PN.DV.H.TCQG.. | 160 |
| <b>ABA19437</b> | 107 | T....R...D.. | SI.HRKF.NTP-YKVCFSRNSMKE | .RR..PN.DV.H.TCQG.. | 160 |
| <b>ABS81426</b> | 107 | T....R...D.. | SI.HREC.NTP-YKVCFSRNSMKE | .RR..PN.DV.H.THQG.. | 160 |

Database: All non-redundant GenBank CDS translations+PDB+SwissProt+PIR+PRF excluding environmental samples from WGS projects

Posted date: Jan 24, 2008 5:51 PM

Number of letters in database: 2,024,981,677

Number of sequences in database: 5,872,341

Lambda K H  
0.328 0.139 0.522

Gapped

Lambda K H  
0.267 0.0594 0.140

Matrix: BLOSUM62

Gap Penalties: Existence: 11, Extension: 1

Number of Sequences: 5872341

Number of Hits to DB: 31550355

Number of extensions: 1618417

Number of successful extensions: 3976

Number of sequences better than 100: 3

Number of HSP's better than 100 without gapping: 0

Number of HSP's gapped: 3975

Number of HSP's successfully gapped: 3

Length of query: 55

Length of database: 2024981677

Length adjustment: 28

Effective length of query: 27

Effective length of database: 1860556129

Effective search space: 50235015483

Effective search space used: 50235015483

T: 11

A: 40

X1: 15 (7.1 bits)

X2: 38 (14.6 bits)

X3: 64 (24.7 bits)

S1: 40 (19.5 bits)

S2: 65 (29.1 bits)

# RAY-FINNED FISH Alignments

| Query    | 1   | VIIHPHFCHCTC | WTVIRK | WISDPNS | QEMGLADRVV      | WLP            | PHSLFKIC | CDT  | ---- | G        | ---- | 50   |      |     |
|----------|-----|--------------|--------|---------|-----------------|----------------|----------|------|------|----------|------|------|------|-----|
| AAR03708 | 137 | ..PM..R      | ..AMR  | ----    | GGGICFSFRT      | .PI            | .K.      | .NSQ | .LQ  | .YP      | -K   | ---- | 180  |     |
| ABG47788 | 124 | ..SR...R     | ..AMR  | ----    | GGGICFSFRT      | .PI            | .K.      | .SH  | .LH  | .YP      | -K   | ---- | 167  |     |
| ABG47790 | 124 | ..PM..R      | ..AMR  | ----    | GGGICFSFRT      | .PI            | .K.      | .SH  | .LH  | .YP      | -K   | ---- | 167  |     |
| ABG47796 | 124 | ..PM..R      | .N     | .AMR    | ----            | GGGICFSFRT     | .PI      | .K.  | .NSQ | .LH      | .YP  | -K   | ---- | 167 |
| ABG47743 | 122 | ..SM..R      | ..AMR  | ----    | GGGICFSFRT      | .PI            | .K.      | .NSH | .LH  | .YP      | -K   | ---- | 165  |     |
| ABG47767 | 124 | ..PM..R      | ..AMR  | ----    | GGGICFSFRT      | .PI            | .K.      | .NSH | .LH  | .YP      | -K   | ---- | 167  |     |
| ABG47721 | 124 | ..SM..R      | ..AMR  | ----    | GGGICFSFRT      | .PI            | .K.      | .NSH | .LH  | .YP      | -K   | ---- | 167  |     |
| ABG47757 | 123 | ..PM..R      | .N     | .AMR    | ----            | GGGICFSFRTM    | .PI      | .K.  | .NSH | .LH      | .YP  | -K   | ---- | 166 |
| ABG47722 | 124 | ..SM..R      | ..AMR  | ----    | GGGICFSFRT      | .PI            | .K.      | .NSH | .LH  | .YP      | -K   | ---- | 167  |     |
| ABG47798 | 124 | ..PM..R      | ..AMR  | ----    | GGGICFSFRT      | .PI            | .K.      | .NSH | .LH  | .HP      | -K   | ---- | 167  |     |
| ABG47715 | 124 | ..PM..R      | .N     | .AMR    | ----            | GGGICFSFRTMIPV | .K.      | .NSH | .LH  | .YP      | -K   | ---- | 167  |     |
| ABG47775 | 124 | ..PM..R      | .S     | .AMR    | ----            | GGGICFSFRT     | .PI      | .K.  | .NSH | .LH      | .YP  | -Q   | ---- | 167 |
| ABG47732 | 124 | ..PM..R      | ..AMR  | ----    | GGGICFSFRT      | .PI            | .K.      | .NSH | .LH  | .YP      | -K   | ---- | 167  |     |
| ABG47741 | 124 | ..PM..R      | .N     | .AMR    | ----            | GGGICFSFRT     | .PI      | .K.  | .NSQ | .LH      | .YP  | -K   | ---- | 167 |
| ABG47799 | 124 | ..PM..R      | ..AMR  | ----    | GGGICSFTRT      | .PI            | .K.      | .NSH | .LH  | .HP      | -K   | ---- | 167  |     |
| ABG47785 | 124 | ..PR..R      | ..AMR  | ----    | GGGICFSFRT      | .PV            | .K.      | .NSH | .LH  | .YP      | -K   | ---- | 167  |     |
| ABG47723 | 121 | ..PM..R      | ..AMR  | ----    | GGGICFSFRT      | .PI            | .K.      | .NSH | .LH  | .YP      | -K   | ---- | 164  |     |
| ABG47744 | 124 | ..PM..R      | ..AMR  | ----    | GGGICFSFRT      | .PI            | .K.      | .NSH | .LH  | .YP      | -K   | ---- | 167  |     |
| ABG47700 | 124 | ..PM..R      | .N     | .AMR    | ----            | GGGICFSFRTM    | .PI      | .K.  | .NSH | .LH      | .YP  | -K   | ---- | 167 |
| ABG47752 | 124 | ..PM..R      | ..AMR  | ----    | GGGICFSFRT      | .PI            | .K.      | .NSH | .LH  | .YP      | -K   | ---- | 167  |     |
| ABG47693 | 124 | ..PM..R      | .N     | .AMR    | ----            | GGGICFSFRTMIP  | .K.      | .NSH | .LH  | .YP      | -K   | ---- | 167  |     |
| ABG47706 | 124 | ..PM..R      | ..AMR  | ----    | GGGICFSFRT      | .PI            | .K.      | .NSH | .LH  | .YP      | -K   | ---- | 167  |     |
| ABG47710 | 124 | ..PR..R      | ..AIR  | ----    | GGGICFSFRT      | .PI            | .K.      | .TSH | .LH  | .YP      | -K   | ---- | 167  |     |
| ABG47716 | 124 | ..PM..R      | ..AMR  | ----    | GGGICFSFRT      | .PI            | .K.      | .NSH | .LH  | .YP      | -K   | ---- | 167  |     |
| ABG47746 | 124 | ..PM..R      | ..AMR  | ----    | GGGICFSFRT      | .PI            | .K.      | .NSH | .LH  | .YP      | -K   | ---- | 167  |     |
| ABG47699 | 124 | ..SR..R      | ..AMR  | ----    | GGGICFSFRT      | .PI            | .K.      | .NSH | .LH  | .YP      | -K   | ---- | 167  |     |
| ABG47738 | 124 | ..SM..R      | ..AMR  | ----    | GGGICFSFRT      | .PI            | .K.      | .NTH | .LH  | .YP      | -K   | ---- | 167  |     |
| ABG47719 | 124 | ..PM..R      | .S     | .AMR    | ----            | GGGICFSFRTS    | .PI      | .K.  | .NSH | .HH      | .YP  | -K   | ---- | 167 |
| ABG47720 | 120 | ..PR..R      | ..AIR  | ----    | GGGICFSFRT      | .PI            | .K.      | .TSH | .LH  | .YP      | -K   | ---- | 163  |     |
| ABG47786 | 124 | ..SR..R      | ..AMR  | ----    | GGGICFSFRT      | .PI            | .K.      | .NSH | .LH  | .YP      | -K   | ---- | 167  |     |
| ABG47694 | 124 | ..PM..R      | ..AMR  | ----    | GGGICFSFRTS     | .PI            | .K.      | .NTH | .LH  | .YP      | -K   | ---- | 167  |     |
| ABG47697 | 124 | ..PM..R      | ..AMR  | ----    | GGGICFSFRT      | .PI            | .K.      | .NSH | .LQ  | .HP      | -K   | ---- | 167  |     |
| ABG47776 | 111 | ..PM..R      | .S     | .AMR    | ----            | GGGICFSFRT     | .PI      | .K.  | .NSH | .LH      | .YP  | -Q   | ---- | 154 |
| ABG47691 | 114 | ..PM..R      | .N     | .AMR    | ----            | GGGICFSFRTM    | .PI      | .K.  | .NSH | .ML      | .YP  | -K   | ---- | 157 |
| ABG47789 | 124 | ..SM..R      | ..AMR  | ----    | GGGICXFSRT      | .PI            | .K.      | .NSH | .LH  | .YP      | -K   | ---- | 167  |     |
| ABG47712 | 124 | ..PM..R      | ..AMR  | ----    | GGGICFSFRT      | .PI            | .K.      | .NAH | .LH  | .YP      | -K   | ---- | 167  |     |
| ABG47784 | 124 | ..PM..R      | ..AMR  | ----    | GGGICSFTRT      | .PI            | .K.      | .NSH | .LH  | .YP      | -K   | ---- | 167  |     |
| ABG47748 | 123 | ..PM..R      | ..AMR  | ----    | GGGICFSFRT      | .PI            | .K.      | .NSH | .LQ  | .YP      | -K   | ---- | 166  |     |
| ABG47782 | 124 | ..PR..R      | ..AIR  | ----    | GGGICFSFRT      | .PI            | .K.      | .TSH | .LH  | .YP      | -K   | ---- | 167  |     |
| ABG47711 | 124 | ..PM..R      | .S     | .AMR    | ----            | GGGICSFTRTS    | .PI      | .K.  | .NSH | .LH      | .YP  | -Q   | ---- | 167 |
| ABG47770 | 124 | ..PR..R      | ..AIR  | ----    | GGGICFSFRT      | .PI            | .K.      | .TSH | .LH  | .YP      | -K   | ---- | 167  |     |
| ABG47772 | 124 | ..PM..R      | ..AMR  | ----    | GGGICFSFRT      | .PI            | .K.      | .NSH | .LQ  | .YP      | -K   | ---- | 167  |     |
| ABG47703 | 124 | ..PM..R      | ..AMR  | ----    | GGGICFSFRTS     | .PI            | .K.      | .NSQ | .LQ  | .YP      | -K   | ---- | 167  |     |
| ABK33045 | 124 | ..SR..R      | .A     | .AMR    | ----            | GGGICFSFRTM    | .PI      | .K.  | .NSH | .LH      | .YP  | -K   | ---- | 167 |
| ABG47730 | 124 | ..PM..R      | ..AMR  | ----    | GGGICFSFRTS     | .PI            | .K.      | .NSQ | .LQ  | .YP      | -K   | ---- | 167  |     |
| ABG47704 | 124 | ..PR..R      | ..AMR  | ----    | GGGICFSFRT      | .PI            | .K.      | .NSH | .LH  | .YP      | -K   | ---- | 167  |     |
| ABG47762 | 124 | ..PM..R      | .N     | .AMR    | ----            | GGGICFSFRT     | .PI      | .K.  | .NSH | .PH      | .YP  | -K   | ---- | 167 |
| ABG47718 | 124 | ..PM..R      | .S     | .AMR    | ----            | GGGICFSFRTS    | .PI      | .K.  | .NSH | .HH      | .YP  | -K   | ---- | 167 |
| ABG47734 | 124 | ..PM..R      | ..AIR  | ----    | GGGICFSFRT      | .PI            | .K.      | .NSH | .LY  | .YP      | -K   | ---- | 167  |     |
| ABG47725 | 105 | ..PM..R      | ..AMR  | ----    | GGGICFSFRT      | .PI            | .K.      | .NSH | .LH  | .YP      | -K   | ---- | 148  |     |
| ABG47792 | 124 | ..PM..R      | ..AMR  | ----    | GGGICFSFRT      | .PI            | .K.      | .NSH | .LQ  | .YP      | -K   | ---- | 167  |     |
| ABG47777 | 124 | ..PM..R      | ..AMR  | ----    | GGGICFSFRT      | .PI            | .K.      | .NSH | .LL  | .YP      | -K   | ---- | 167  |     |
| ABG47769 | 122 | ..PM..R      | ..AMR  | ----    | GGGICFSFRT      | .PI            | .K.      | .NSH | .LH  | .YP      | -K   | ---- | 170  |     |
| ABG47783 | 124 | ..SM..R      | ..AMR  | ----    | GGGICFSFRT      | .PI            | .K.      | .NAH | .LH  | .YP      | -K   | ---- | 167  |     |
| ABG47774 | 123 | ..PM..R      | .N     | .AMR    | ----            | GGGICNFSRIM    | .PI      | .K.  | .NSQ | .LH      | .YP  | -K   | ---- | 166 |
| ABG47781 | 124 | ..PM..R      | ..AIR  | ----    | GGGICFSFRT      | .PI            | .K.      | .NSH | .LY  | .YP      | -K   | ---- | 167  |     |
| ABG47764 | 124 | ..PK..R      | ..AMR  | ----    | GGGICFSFRTM     | .PM            | .K.      | .TSH | .LQ  | .YP      | -K   | ---- | 167  |     |
| ABG47708 | 124 | ..PM..R      | ..AIR  | ----    | GGGICFSFRT      | .PI            | .K.      | .NSH | .LH  | .YP      | -K   | ---- | 167  |     |
| ABG47787 | 124 | ..PM..R      | .N     | .AMR    | ----            | GGGICFSFRIMPT  | .K.      | .TSH | .VH  | .YP      | -Q   | ---- | 167  |     |
| ABG47735 | 124 | ..PM..R      | ..AMR  | ----    | GGGICFSFRT      | .PI            | .K.      | .NSH | .LY  | .YP      | -R   | ---- | 167  |     |
| ABG47765 | 123 | T..SL..R     | ..AMR  | ----    | GGGFCFSFRTS     | .PV            | .K.      | .SH  | .PL  | .FP      | -K   | ---- | 167  |     |
| ABG47707 | 124 | ..PM..R      | ..SMR  | ----    | GGGICFSFRT      | .PI            | .K.      | .NSQ | .LH  | .YP      | -K   | ---- | 167  |     |
| ABG47736 | 122 | T..SM..R     | ..AMR  | ----    | GGGFCFSFRT      | .PV            | .K.      | .H   | .LL  | .FP      | -K   | ---- | 171  |     |
| ABG47756 | 124 | ..PM..R      | ..SMR  | ----    | GGGICFSFRT      | .PI            | .K.      | .NSH | .LH  | .YP      | -K   | ---- | 167  |     |
| ABG47709 | 124 | ..PM..R      | ..AMR  | ----    | GGGICFSFRT      | .PI            | .K.      | .NTH | .LH  | .YP      | -K   | ---- | 167  |     |
| ABG47771 | 124 | ..PM..R      | ..AIR  | ----    | GGGICFSFRT      | .PI            | .K.      | .NSH | .LY  | .YP      | -K   | ---- | 167  |     |
| ABG47751 | 120 | ..SM..R      | ..AIR  | ----    | GGGICFSFRT      | .PI            | .K.      | .SH  | .LY  | .YP      | -K   | ---- | 168  |     |
| ABG47698 | 123 | ..SM..R      | ..AIR  | ----    | GGGICFSFRT      | .PI            | .K.      | .NAH | .LH  | .YP      | -K   | ---- | 166  |     |
| ABG47759 | 91  | ..PR..R      | ..AIR  | ----    | GGGICSFTRTM     | .PI            | .K.      | .TSH | .LH  | .YP      | -K   | ---- | 134  |     |
| ABG47793 | 114 | ..PM..R      | .A     | .AMR    | ----            | GGGICFSFRT     | .PI      | .K.  | .NSQ | .LH      | .YP  | -K   | ---- | 157 |
| ABG47754 | 124 | ..PM..R      | ..AMR  | ----    | GGGICFSFRT      | .TI            | .K.      | .N   | .H   | .LH      | .YP  | -K   | ---- | 167 |
| ABG47778 | 124 | ..PM..R      | .A     | .AMR    | ----            | GGGICFSFRT     | .PI      | .K.  | .NSQ | .LH      | .YP  | -K   | ---- | 167 |
| ABG47742 | 124 | ..PM..R      | ..AIR  | ----    | GGGICFSFRT      | .PI            | .K.      | .N   | .H   | .LH      | .YP  | -K   | ---- | 167 |
| ABG47740 | 101 | ..PM..R      | ..AIR  | ----    | GGGICFSFRT      | .PI            | .K.      | .NSH | .LH  | .YP      | -K   | ---- | 144  |     |
| ABM46911 | 163 | TV..SL..R    | ..AAMR | ----    | GGGFCFSFTRTQIPD | .K.            | .TSN     | .DL  | .FP  | -K       | ---- | 207  |      |     |
| ABG47753 | 124 | ..PM..R      | .YN    | .AMR    | ----            | GGGICFSFRT     | .PM      | .K.  | .NSQ | .LH      | .YP  | -K   | ---- | 167 |
| ABG47749 | 124 | ..PM..R      | ..AIR  | ----    | GGGICSFTRT      | .PI            | .K.      | .NSH | .LY  | .YP      | -K   | ---- | 172  |     |
| ABG47763 | 123 | T..AM..O     | ..AIR  | ----    | GGGICSFTRTQ     | .PV            | .K.      | .TSN | .LL  | .YPIRKLH | ---- | 172  |      |     |
| ABG47696 | 113 | ..PM..R      | ..AIR  | ----    | GGGICFSFRT      | .PI            | .R.      | .N   | .H   | .LH      | .YP  | -K   | ---- | 156 |
| ABG47773 | 124 | ..PM..R      | .FN    | .AMR    | ----            | GGGICFSFRT     | .PI      | .K.  | .NSQ | .PH      | .YP  | -K   | ---- | 167 |
| ABG47727 | 30  | T..PM..R     | .I     | .AMR    | ----            | GGGICFSFRT     | .PV      | .K.  | .NTH | .LH      | .YP  | -K   | ---- | 74  |
| ABG47692 | 124 | ..SM..R      | ..AIR  | ----    | GGGICFSFRT      | .PI            | .R.      | .NSH | .LY  | .YP      | -K   | ---- | 167  |     |
| ABG47726 | 31  | T..PM..R     | .I     | .AMR    | ----            | GGGICFSFRT     | .PV      | .K.  | .NTH | .LL      | .YP  | -K   | ---- | 75  |
| ABG47695 | 120 | ..SM..R      | ..AIR  | ----    | GGGICFSFRT      | .PI            | .K.      | .NSH | .LY  | .YP      | -K   | ---- | 163  |     |
| ABG47750 | 103 | ..PM..R      | ..AIR  | ----    | GGGICFSFRT      | .PX            | .K.      | .NSH | .LY  | .YP      | -K   | ---- | 151  |     |
| ABG47794 | 116 | T..SM..O     | ..AIR  | ----    | GGGFCFSFRT      | .O             | .R.      | .TSQ | .LL  | .YP      | -K   | ---- | 165  |     |
| ABG47747 | 61  | ..PM..R      | ..AMR  | ----    | GGGICSFTRT      | .PI            | .K.      | .NSH | .LH  | .YP      | -K   | ---- | 104  |     |



|           |     |            |              |                |             |             |      |      |           |           |        |        |      |        |     |
|-----------|-----|------------|--------------|----------------|-------------|-------------|------|------|-----------|-----------|--------|--------|------|--------|-----|
| ABG47768  | 117 | ...PR...R  | ...AMR----   | GGGICFSFSRT    | .PV         | .KS         | .NSH | .LQ  | .YP       | ----      | K      | ----   | 160  |        |     |
| ABK33043  | 124 | ...LR...R  | ...AMR----   | GGGICFSFSRT    | .PI         | .K          | .NSH | .LH  | .YP       | ----      | K      | ----   | 167  |        |     |
| ABG47761  | 31  | ...PM...R  | ...AMR----   | GGGICFSFSRT    | .PI         | .K          | .NSH | .LY  | .YP       | ----      | K      | ----   | 74   |        |     |
| ABG47766  | 123 | T...M...R  | ...AIR----   | GGGICFSFSRT    | .PV         | .K          | .NSH | .LL  | .YP       | ----      | K      | ----   | 167  |        |     |
| ABG47795  | 131 | ...PK...R  | ...AIR----   | GGGICFSFSRT    | .PV         | .K          | .NSH | .LH  | .YP       | ----      | K      | ----   | 174  |        |     |
| ABG47733  | 116 | ...SK...R  | ...AIR----   | GGGICFSFSRT    | .PI         | .K          | .NSH | .LY  | .YP       | ----      | K      | ----   | 159  |        |     |
| ABG47755  | 108 | T...SM...R | .R           | .ALR----       | GGGICFSFSRT | .PV         | .R   | .NSH | .SX       | .YPKIKIFK | ----   | ----   | 157  |        |     |
| ABG47731  | 123 | T...SM...R | ...ALR----   | GGGICFSFSRT    | .PV         | .R          | .NSH | .SL  | .YPKIKIFK | ----      | ----   | ----   | 172  |        |     |
| ABG47705  | 105 | ...PK...R  | ...AIR----   | GGGICFSFSRT    | .PI         | .K          | .NSQ | .LY  | .YP       | ----      | K      | ----   | 148  |        |     |
| ABG47800  | 119 | ...PM...R  | ...IAMR----  | GGGICFSFSRT    | .PN         | .S          | .NSQ | .MH  | .YP       | ----      | Q      | ----   | 162  |        |     |
| ABG47780  | 61  | ...PM...R  | ...AIR----   | GGGICFSFTRT    | .PI         | .K          | .NSH | .LH  | .YP       | ----      | KRNILO | ----   | 109  |        |     |
| ABM65103  | 163 | TV..SL...R | ...AAMR----  | GGGFCSFTRTHIPD | .K          | .TSH        | .NL  | .FP  | ----      | ----      | ----   | ----   | 207  |        |     |
| ABG47714  | 24  | T...ST...R | ...AIR----   | GGGFCSFTRTQ    | .PE         | .R          | ..   | .SH  | .LL       | .YP       | ----   | KIKTFR | 73   |        |     |
| AA83678   | 139 | V..LS...R  | ...AAIR----  | GGGFCSFSRT     | .PE         | .K          | ..   | .SS  | .HL       | ----      | ----   | ----   | 179  |        |     |
| ABG47779  | 130 | ...PM...R  | .A           | .AMR----       | GGGICFSFSQT | .PI         | .K   | .NSQ | .LH       | .YP       | ----   | K      | ---- | 173    |     |
| ABG47791  | 31  | T...SM...Q | ...AXR----   | GGGFCSFTRTN    | .PX         | .R          | .NSN | .LL  | .YPKIKLA  | ----      | ----   | ----   | 80   |        |     |
| AA116495  | 163 | TV..SL...R | ...AAMR----  | GGGFCSFTRTQIPD | .K          | .TTH        | .NL  | .FP  | ----      | ----      | ----   | ----   | 207  |        |     |
| CAG03454  | 161 | V..LF...R  | ...MTAIR---- | GGGVCSFSRI     | .PE         | .K          | ..   | .SH  | .EL       | .SP       | ----   | ----   | 203  |        |     |
| ABG47739  | 124 | ...LM...R  | ...TIR----   | GGGICFSFSRT    | .PI         | .V          | .NSR | .VH  | .YP       | ----      | K      | ----   | 167  |        |     |
| ABG47713  | 123 | T...AM...L | ...AIR----   | GGGFCSFTRTQ    | .PV         | .K          | .T   | .N   | .LL       | .YPOIKKLO | ----   | ----   | 172  |        |     |
| ABG47701  | 123 | T...SM...R | .K           | .AM            | ----        | GGGICFSFSRT | .TPV | .R   | .NTQ      | .LL       | .YP    | ----   | K    | 167    |     |
| ABG47702  | 123 | T...SM...R | .K           | .AM            | ----        | GGGICFSFSRT | .IPV | .R   | .NSQ      | .LL       | .YP    | ----   | K    | 167    |     |
| ABG47745  | 112 | ...PM...C  | .N           | .AIR           | ----        | GGGICNFSRIM | .PL  | .K   | .N        | .H        | .LH    | .YP    | ---- | K      | 155 |
| ABG47760  | 60  | T...SM...R | ...ALR----   | GGGICFSFSRT    | .PV         | .R          | .NSH | .SL  | .YP       | ----      | ----   | ----   | 103  |        |     |
| NP 571464 | 163 | TV..SL...R | ...AAIR----  | GGGFCSFTNT     | .IPD        | .K          | .TSQ | .NL  | .FP       | ----      | ----   | ----   | 207  |        |     |
| ABG47797  | 112 | ...PM...H  | .N           | .AIR           | ----        | GGGICNFSRIM | .PV  | .K   | .NVQ      | .LH       | .YP    | ----   | K    | 155    |     |
| ABG47717  | 87  | ...PM...R  | ...IAMR----  | GGGICNFSRT     | .PHGS       | .NS         | .MH  | .YA  | ----      | Q         | ----   | ----   | 130  |        |     |
| ABG47728  | 123 | T...SL..PR | .S           | .ALR           | ----        | GGGFCSFSRT  | .PV  | .K   | .T        | .H        | .LL    | .FP    | ---- | KRLILO | 172 |
| Q91187    | 169 | .V..PF..QR | ...LAMR----  | GGGFCSFSRTH    | .P          | .R          | .TTL | .LL  | .TP       | ----      | ----   | ----   | 212  |        |     |
| ABD20561  | 173 | V..LF...H  | ...MTAIR---- | GGGVCSLSRT     | .RA         | .K          | ..   | .SL  | .EL       | .SP       | ----   | ----   | 215  |        |     |
| ABG47724  | 3   |            |              | GGGFCSFSRTQ    | .PV         | .K          | ..   | .SH  | .LL       | .YP       | ----   | ----   | K    | 30     |     |
| ABG47729  | 3   |            |              |                |             | .PI         | .K   | .NSH | .LY       | .YP       | ----   | ----   | K    | 19     |     |

|          |     |       |     |
|----------|-----|-------|-----|
| Query    | 51  | NRAVK | 55  |
| AA03708  | 181 | RH    | 182 |
| ABG47788 | 168 | RHTL  | 171 |
| ABG47790 | 168 | RH    | 169 |
| ABG47796 | 168 | R     | 169 |
| ABG47743 | 166 | R     | 169 |
| ABG47767 | 168 | RHTL  | 171 |
| ABG47721 | 168 | R     | 171 |
| ABG47757 | 167 | RHTL  | 170 |
| ABG47722 | 168 | R     | 171 |
| ABG47798 | 168 | RH    | 169 |
| ABG47715 | 168 | RHTL  | 171 |
| ABG47775 | 168 | R     | 169 |
| ABG47732 | 168 | R     | 169 |
| ABG47741 | 168 | RH    | 169 |
| ABG47799 | 168 | RH    | 169 |
| ABG47785 | 168 | RH    | 169 |
| ABG47723 | 165 | RH    | 166 |
| ABG47744 | 168 | R     | 171 |
| ABG47700 | 168 | RHTL  | 171 |
| ABG47752 | 168 | RH    | 169 |
| ABG47693 | 168 | RHTL  | 171 |
| ABG47706 | 168 | RH    | 169 |
| ABG47710 | 168 | RH    | 169 |
| ABG47716 | 168 | RH    | 169 |
| ABG47746 | 168 | RH    | 169 |
| ABG47699 | 168 | RH    | 169 |
| ABG47738 | 168 | RH    | 169 |
| ABG47719 | 168 | RH    | 169 |
| ABG47720 | 164 | RH    | 165 |
| ABG47786 | 168 | RH    | 169 |
| ABG47694 | 168 | RH    | 169 |
| ABG47697 | 168 | RH    | 169 |
| ABG47776 | 155 | R     | 156 |
| ABG47691 | 158 | RH    | 159 |
| ABG47789 | 168 | RH    | 169 |
| ABG47712 | 168 | RHTI  | 171 |
| ABG47784 | 168 | RH    | 169 |
| ABG47748 | 167 | RH    | 168 |
| ABG47782 | 168 | RH    | 169 |
| ABG47711 | 168 | R     | 169 |
| ABG47770 | 168 | RH    | 169 |
| ABG47772 | 168 | RH    | 169 |
| ABG47703 | 168 | RH    | 169 |
| ABK33045 | 168 | RH    | 169 |
| ABG47730 | 168 | RH    | 169 |
| ABG47704 | 168 | RH    | 169 |
| ABG47762 | 168 | RH    | 169 |
| ABG47718 | 168 | RH    | 169 |
| ABG47734 | 168 | RH    | 169 |
| ABG47725 | 149 | RH    | 150 |
| ABG47792 | 168 | RH    | 169 |
| ABG47777 | 168 | R     | 169 |
| ABG47769 | 171 | R     | 175 |
| ABG47783 | 168 | RH    | 169 |
| ABG47774 | 167 | RH    | 168 |
| ABG47781 | 168 | RH    | 169 |
| ABG47764 | 168 | R     | 169 |
| ABG47708 | 168 | RH    | 169 |
| ABG47787 | 168 | RHKL  | 171 |
| ABG47735 | 168 | RH    | 169 |
| ABG47765 | 168 | R     | 168 |
| ABG47707 | 168 | RH    | 169 |
| ABG47736 | 172 | R     | 176 |
| ABG47756 | 168 | RQ    | 169 |
| ABG47709 | 168 | RH    | 169 |
| ABG47771 | 168 | RH    | 169 |
| ABG47751 | 169 | R     | 173 |
| ABG47698 | 167 | RH    | 168 |
| ABG47759 | 135 | RH    | 136 |

|                 |     |       |     |
|-----------------|-----|-------|-----|
| <b>ABG47793</b> | 158 | RH    | 159 |
| <b>ABG47754</b> | 168 | RH    | 169 |
| <b>ABG47778</b> | 168 | RH    | 169 |
| <b>ABG47742</b> | 168 | RH    | 169 |
| <b>ABG47740</b> | 145 | RH    | 146 |
| <b>ABG47753</b> | 168 | R.    | 169 |
| <b>ABG47749</b> | 173 | R.GR. | 177 |
| <b>ABG47763</b> | 173 | R.GR. | 177 |
| <b>ABG47696</b> | 157 | RH    | 158 |
| <b>ABG47773</b> | 168 | R.TL  | 171 |
| <b>ABG47727</b> | 75  | RH    | 76  |
| <b>ABG47692</b> | 168 | RH    | 169 |
| <b>ABG47726</b> | 76  | RH    | 77  |
| <b>ABG47695</b> | 164 | RH    | 165 |
| <b>ABG47750</b> | 152 | R.GR. | 156 |
| <b>ABG47794</b> | 166 | R.GR. | 170 |
| <b>ABG47747</b> | 105 | RH    | 106 |
| <b>ABG47768</b> | 161 | RH    | 162 |
| <b>ABK33043</b> | 168 | R.    | 169 |
| <b>ABG47761</b> | 75  | RHTI  | 78  |
| <b>ABG47795</b> | 175 | R     | 175 |
| <b>ABG47733</b> | 160 | RHKL  | 163 |
| <b>ABG47755</b> | 158 | R.GR. | 162 |
| <b>ABG47731</b> | 173 | Q.GR. | 177 |
| <b>ABG47705</b> | 149 | RHKL  | 152 |
| <b>ABG47800</b> | 163 | RH    | 164 |
| <b>ABG47780</b> | 110 | R.GR. | 114 |
| <b>ABG47714</b> | 74  | R.GR. | 78  |
| <b>ABG47779</b> | 174 | KH    | 175 |
| <b>ABG47791</b> | 81  | R.GR. | 85  |
| <b>ABG47739</b> | 168 | RH    | 169 |
| <b>ABG47713</b> | 173 | R.GR. | 177 |
| <b>ABG47717</b> | 131 | RH    | 132 |
| <b>ABG47728</b> | 173 | R.GR. | 177 |
| <b>ABG47729</b> | 20  | RHKL  | 23  |

Database: All non-redundant GenBank CDS translations+PDB+SwissProt+PIR+PRF excluding environmental samples from WGS projects

Posted date: Jan 24, 2008 5:51 PM

Number of letters in database: 2,024,981,677

Number of sequences in database: 5,872,341

|        |       |       |  |
|--------|-------|-------|--|
| Lambda | K     | H     |  |
| 0.328  | 0.139 | 0.522 |  |

Gapped

|        |        |       |  |
|--------|--------|-------|--|
| Lambda | K      | H     |  |
| 0.267  | 0.0594 | 0.140 |  |

Matrix: BLOSUM62

Gap Penalties: Existence: 11, Extension: 1

Number of Sequences: 5872341

Number of Hits to DB: 31550355

Number of extensions: 1618417

Number of successful extensions: 3976

Number of sequences better than 100: 3

Number of HSP's better than 100 without gapping: 0

Number of HSP's gapped: 3975

Number of HSP's successfully gapped: 3

Length of query: 55

Length of database: 2024981677

Length adjustment: 28

Effective length of query: 27

Effective length of database: 1860556129

Effective search space: 50235015483

Effective search space used: 50235015483

T: 11

A: 40

X1: 15 (7.1 bits)

X2: 38 (14.6 bits)

X3: 64 (24.7 bits)

S1: 40 (19.5 bits)

S2: 65 (29.1 bits)
